# Supplementary material for: The [1,2,3]Triazolo[1,5-a]pyridine ring: A sensitive sensor for the electronic profile of phosphorus substituents
Source: Royal Society of Chemistry journal article supplement (doi:10.1039/b906034k), 2009-01-01
Supplement: b906034k.pdf [file b906034k.pdf]

## *Electronic Supplementary Information for*

### **The [1,2,3]Triazolo[1,5-a]pyridine Ring: A Sensitive Sensor for the Electronic Profile of Phosphorus Substituents**

Rafael Ballesteros-Garrido,<sup>a</sup> Laurence Bonnafoux,<sup>a</sup> Frédéric R. Leroux,<sup>a\*</sup> Belén Abarca<sup>b\*</sup>  
and Françoise Colobert<sup>a\*</sup>

<sup>a</sup> CNRS and University of Strasbourg (ECPM), UMR 7509, 25 rue Becquerel, 67087 Strasbourg  
(France)

<sup>b</sup> Departament de Química Orgànica, Facultat de Farmàcia, Universitat de València, Avda. Vicente  
Andrés Estellés s/n, 46100 Burjassot; València, (Spain).

## **Table of Contents**

|                                                                                          |    |
|------------------------------------------------------------------------------------------|----|
| Experimental Section .....                                                               | 2  |
| Example of NMR assignment .....                                                          | 4  |
| Experimental data .....                                                                  | 10 |
| Copies of <sup>1</sup> H, <sup>13</sup> C, <sup>31</sup> P NMR and COSY NMR spectra..... | 17 |
| Crystal Structure Analysis.....                                                          | 57 |

## Experimental Section

### General Methods

Starting materials, if commercial, were purchased and used as such, provided that adequate checks (melting ranges, refractive indices, and gas chromatography) had confirmed the claimed purity. When known compounds had to be prepared according to literature procedures, pertinent references are given. Air- and moisture-sensitive materials were stored in Schlenk tubes. They were protected by and handled under an atmosphere of argon, using appropriate glassware. Diethyl ether and tetrahydrofuran were dried by distillation from sodium after the characteristic blue color of sodium diphenyl ketyl (benzophenone-sodium “radical-anion”) had been found to persist. Ethereal or other organic extracts were dried by washing with brine and then by storage over sodium sulfate. If no reduced pressure is specified, boiling ranges (b.p.) refer to ordinary atmosphere conditions ( $725 \pm 25$  Torr). Melting ranges (m.p.) given were found to be reproducible after recrystallization, unless stated otherwise (“decomp.”), and are uncorrected. If melting points are missing, it means all attempts to crystallize the liquid at temperatures down to  $-75$  °C failed. Thin-layer chromatography (TLC) were carried out on 0.25 mm Merck silica-gel (60-F254). The TLC plates were visualized with UV light and 7% phosphomolybdic acid. Column chromatography was carried out on a column packed with silica-gel 60N spherical neutral size 63-210  $\mu\text{m}$ . The solid support was suspended in hexanes and, when all air bubbles had escaped, was washed into the column. When the level of the liquid was still 3 – 5 cm above the support layer, the dry powder, obtained by adsorption of the crude mixture to some 25 mL of silica and subsequent evaporation of the solvent, was poured on top of the column.  $^1\text{H}$  and ( $^1\text{H}$  decoupled)  $^{13}\text{C}$  nuclear magnetic resonance (NMR) spectra were recorded at 400 or 300 and 101 or 75 MHz, respectively. Chemical shifts are reported in  $\delta$  units, parts per million (ppm) and were measured relative to the signals for residual chloroform (7.27 ppm). Coupling constants  $J$  are given in Hz. Coupling patterns are abbreviated as, for example, s (singlet), d (doublet), t (triplet), q (quartet), quint (quintet), td (triplet of doublets) and m (multiplet). H-H COSY experiment were performed for all compounds.

### Assignment of hydrogen atoms:

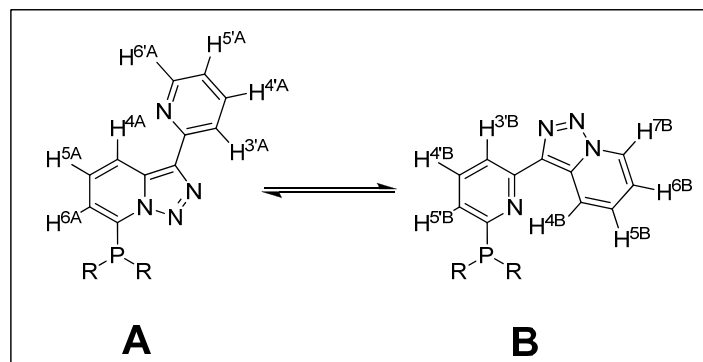

### Typical Experimental procedure for the preparation of [1,2,3]triazolo[1,5-*a*]pyridine phosphines:

At -40 °C, butyllithium (3.6 mL, 5.6 mmol, 1.1 eq ) in hexanes (1.5M) was added to a solution of 3-(pyridin-2'-yl)-[1,2,3]triazolo[1,5-*a*]pyridine **1** (1.0 g, 5.1 mmol, 1.0 eq) in toluene (60 mL). The mixture was kept for 30 min at -40 °C before a solution of the corresponding chlorophosphine (5.9 mmol, 1.15 eq) in toluene (6.0 mL) was added and allowed to reach 20 °C (2 h). The reaction mixture was quenched with water (20 mL). The resulting mixture was extracted with dichloromethane (3×50 mL) and the combined organic extracts were washed with brine (10 mL), dried over Na<sub>2</sub>SO<sub>4</sub>, filtered, and concentrated. Chromatography (silica gel, ethyl acetate/cyclohexane = 3:7) provided the corresponding isomeric A/B mixture of phosphines. The corresponding selenides were prepared according to standard procedure: the phosphines were allowed to react with selenium powder in refluxing chloroform during 5 hours.

## Example of NMR assignment

$^1\text{H}$  NMR from systems **2d** are described in detail in order to show how the assignment has been done.

$^1\text{H}$  NMR of **2d**:

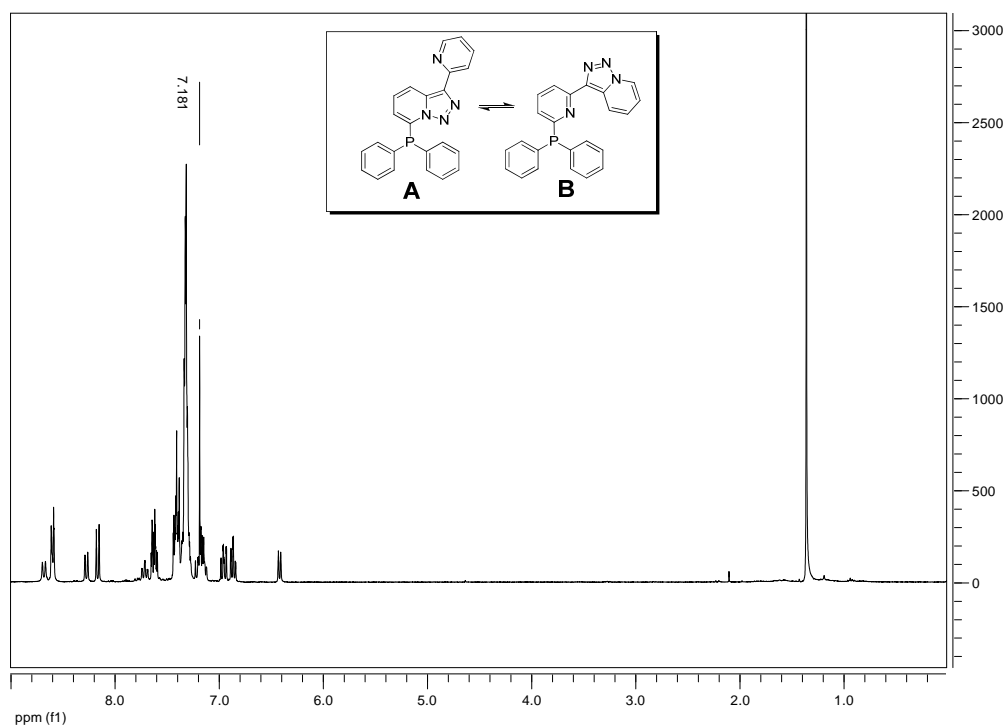

**Zoom of the aromatic region of 2d:**

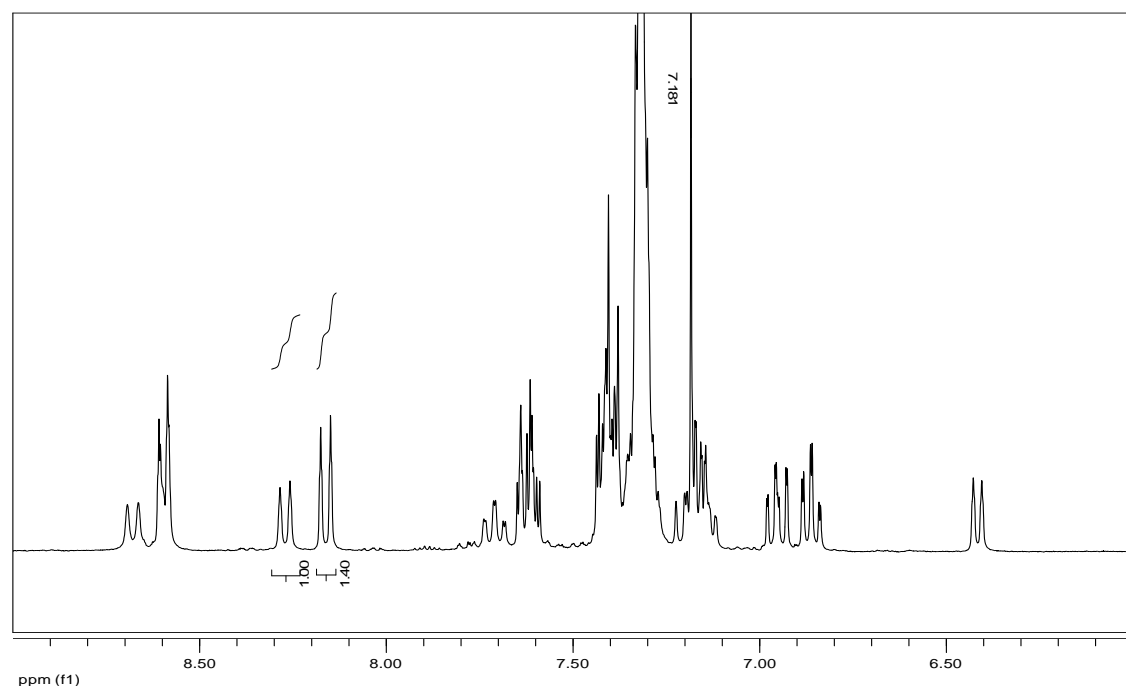

The  $\delta$  and  $J$  values for isomers **A** compared to other **A** isomers described in the literature<sup>(ref 5)</sup> indicates that they have a pyridyl-triazolopyridinephosphine structure. They contain a 3,7-disubstituted triazolopyridine moiety and a 2-substituted pyridine. The presence of a proton near 8.8 ppm with a coupling constant of  $J = 8.8\text{--}9.0$  Hz is significant, corresponding to the  $4^{\text{A}}\text{H}$  triazolopyridine proton. Furthermore, another signal with the same integration can be found near 6.5 ppm with  $J = 6.7\text{--}6.9$  Hz consistent with a  $6^{\text{A}}\text{H}$  proton. In the same way two more signals (appearing as a doublet) with the same integration must be found ( $3^{\text{A}}\text{H}$  and  $6^{\text{A}}\text{H}$ ). Although  $6^{\text{A}}\text{H}$  has, normally, a similar chemical shift than  $7^{\text{B}}\text{H}$ ,  $3^{\text{A}}\text{H}$  can be perfectly found near 8.4 ppm ( $J = 8.0$  Hz). H-H COSY correlation allows assign all protons of these systems.

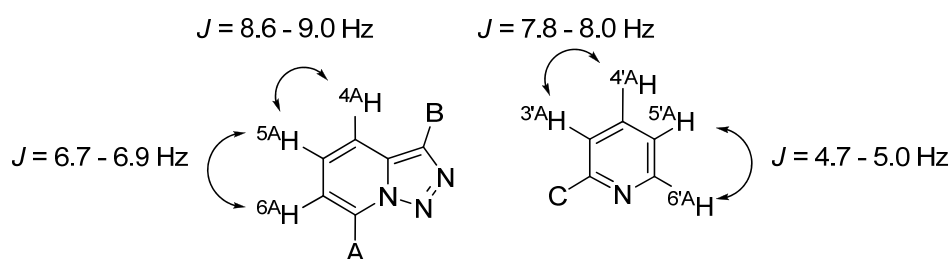

On the other hand, the isomers **B** have a 3-substituted triazolopyridine and a 2,6-disubstituted pyridine. The triazolopyridine presents its 4 hydrogen atoms; in this case  $7^{\text{B}}\text{H}$  and  $4^{\text{B}}\text{H}$  are mixed with other signals from the **A** and/or **B** structure. However,  $6^{\text{B}}\text{H}$  and  $5^{\text{B}}\text{H}$  appears as two apparent triplets. Once these signals are identified, H-H COSY allows the assignation of the whole 3-substituted triazolopyridine. Near 8.3 ppm a doublet with  $J = 8.0$  Hz can be found with the same integration than  $6^{\text{B}}\text{H}$  and  $5^{\text{B}}\text{H}$ . As it has been shown before ( $3^{\text{A}}\text{H}$  : 8.5 ppm, d,  $J = 8.0$  Hz) this signal can be assigned to  $3^{\text{B}}\text{H}$ .

In the  $^1\text{H}$  NMR Spectrum

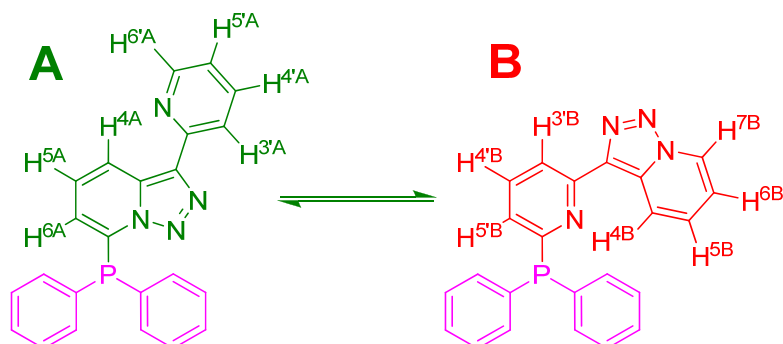

$\text{P}(\text{A}\text{Ph}_2)$  and  $\text{P}(\text{B}\text{Ph}_2)$  are coloured in purple.

Red colour corresponds to the signals of the major isomer (**B** in this case):  $^3\text{B}\text{H}$ ,  $^5\text{B}\text{H}$  and  $^6\text{B}\text{H}$ .

Green colour corresponds to the signals of minor isomer (**A** in this case):  $^4\text{A}\text{H}$ ,  $^3\text{A}\text{H}$ ,  $^5\text{A}\text{H}$  and  $^6\text{A}\text{H}$ .

No colour is used when more than one hydrogen atom provides a signal at the same chemical shift.

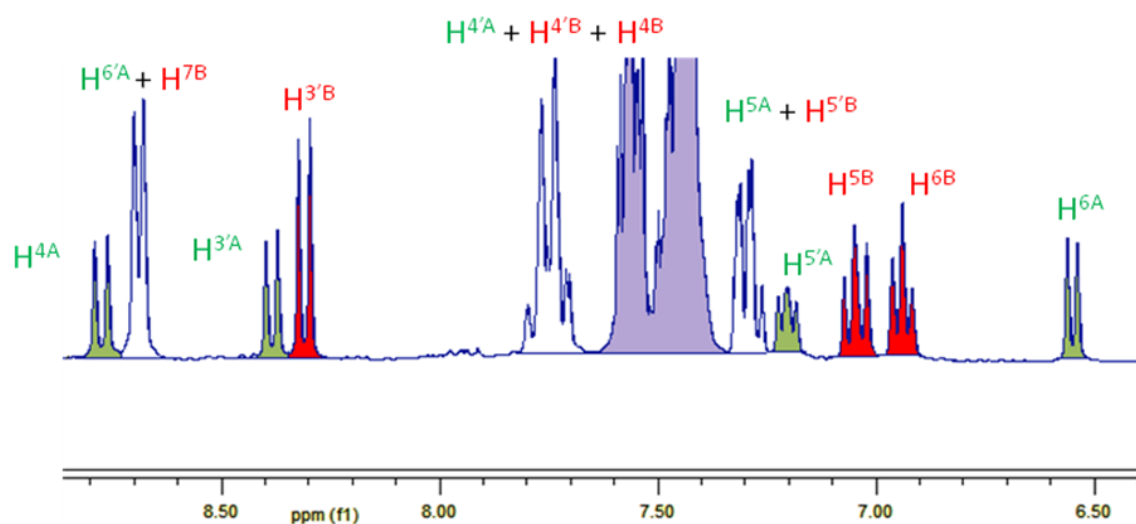

### COSY NMR of 2d:

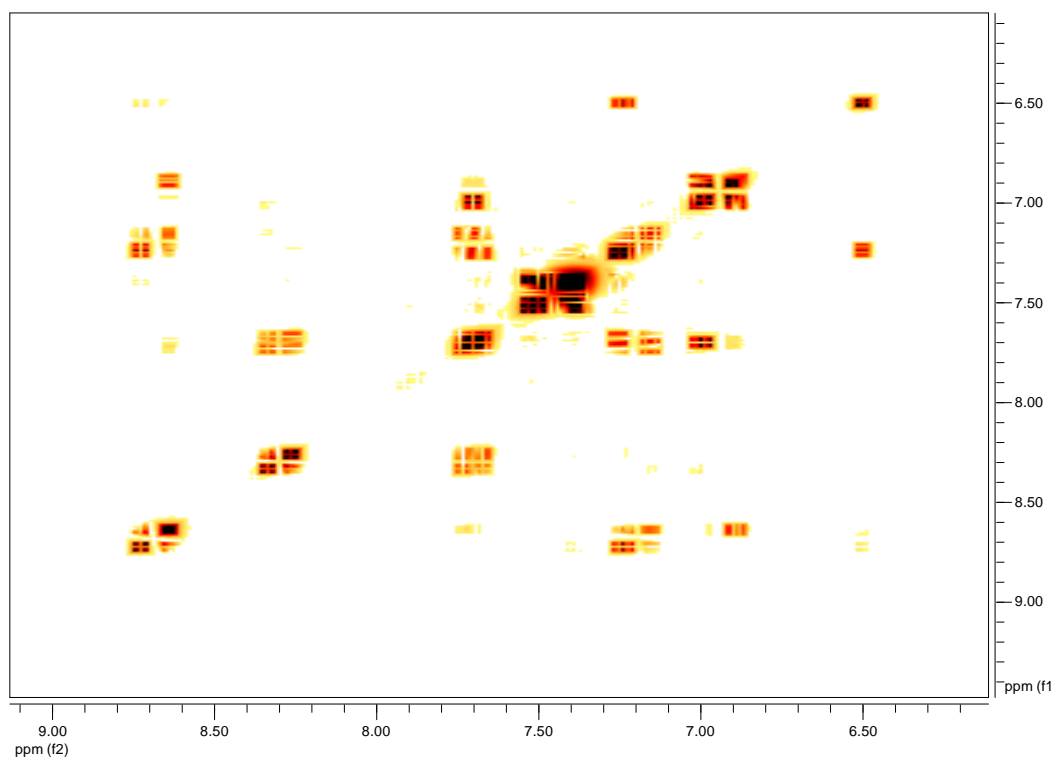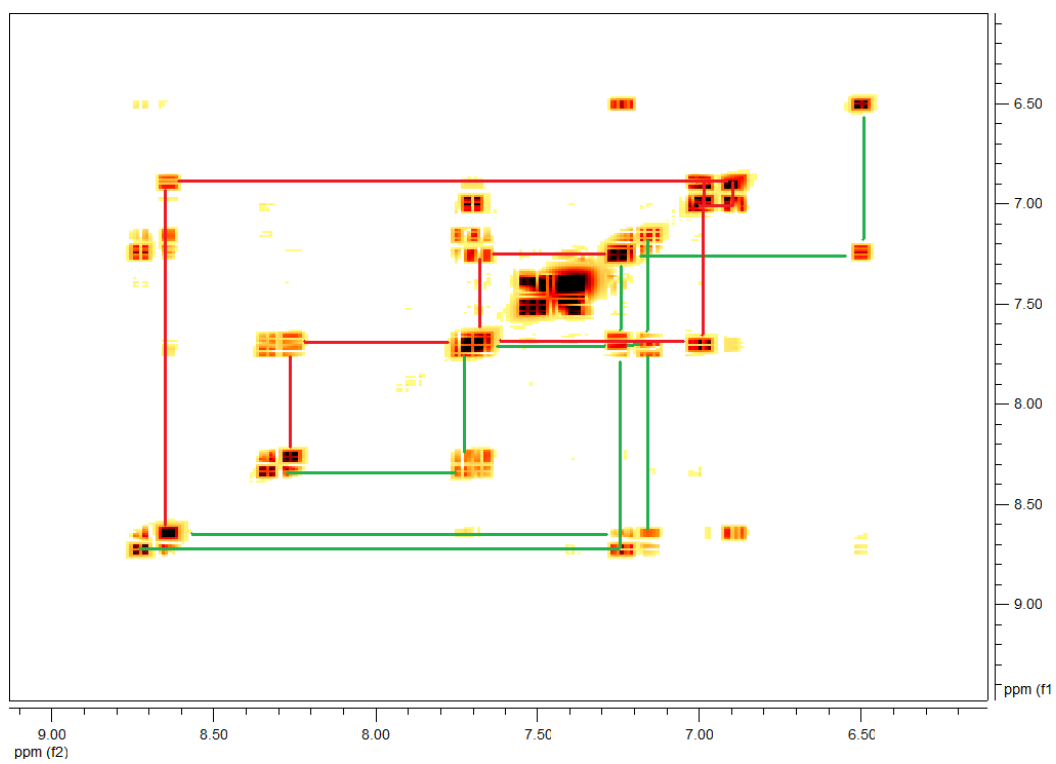



From Up to down: R = PCy<sub>2</sub> (**2a**), P(*p*-OMePh)<sub>2</sub> (**2b**), P(<sup>*i*</sup>Pr)<sub>2</sub> (**2c**), P(Ph)<sub>2</sub> (**2d**), P(*p*-MePh)<sub>2</sub> (**2e**), P(*p*-FPh)<sub>2</sub> (**2f**), P(*p*-CF<sub>3</sub>Ph)<sub>2</sub> (**2g**)

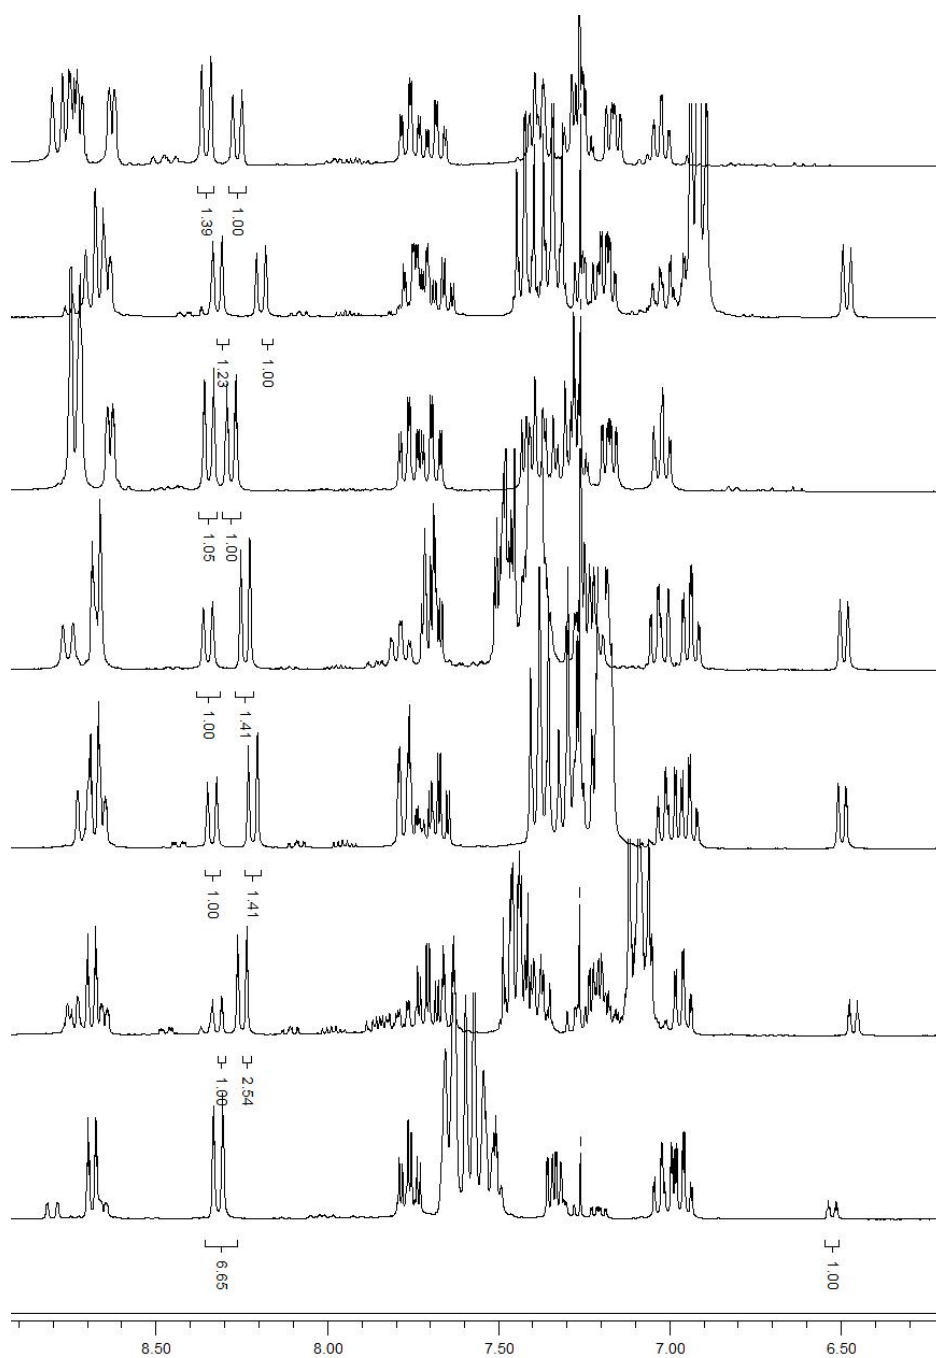

## Experimental data

**7-(Dicyclohexylphosphino)-3-(pyridin-2'-yl)-[1,2,3]triazolo[1,5-a]pyridine (2a-A) and 3-(6'-(dicyclohexylphosphino)pyridin-2'-yl)-[1,2,3]triazolo[1,5-a]pyridine (2a-B).**

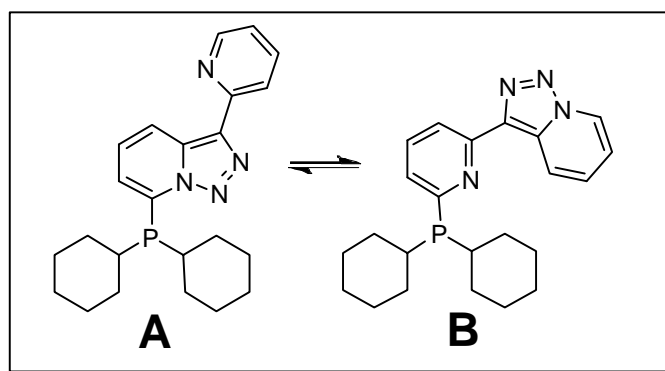

When dicyclohexylphosphine chloride was used, 0.43 g (22%) were obtained after chromatography; A/B ratio = 1.39. – <sup>1</sup>H NMR (300 MHz, CDCl<sub>3</sub>): δ = 8.78 (d, *J* = 8.9 Hz, H<sup>4A</sup>), 8.8-8.7 (m, H<sup>6A</sup>+H<sup>7B</sup>), 8.6 (br d, *J* = 4.9 Hz, H<sup>6A</sup>), 8.35 (d, *J* = 7.9 Hz, H<sup>3A</sup>), 8.26 (d, *J* = 8.0 Hz, H<sup>3B</sup>), 7.75 (ddd, *J* = 7.9, 7.6, 1.8 Hz, H<sup>4A</sup>), 7.68 (ddd, *J* = 8.0, 7.7, 1.9 Hz, H<sup>4B</sup>), 7.4-7.2 (m, H<sup>5A</sup>+H<sup>5B</sup>+H<sup>5B</sup>+H<sup>4B</sup>), 7.16 (dd, *J* = 7.6, 4.9, Hz, H<sup>5A</sup>), 7.02 (ddd, *J* = 6.9, 6.8, 1.1 Hz, H<sup>6B</sup>), 2.8-2.6 (m, 1H), 2.3-2.1 (m, 1H), 2.0-1.8 (m, 2H), 1.8-1.5 (m, 7H), 1.3-0.9 (m, 11H). – <sup>13</sup>C NMR (75.5 MHz, CDCl<sub>3</sub>): δ = 160.82 (C), 160.66 (C), 152.11 (CH<sup>A</sup>), 151.92 (d, *J*<sub>C-P</sub> = 5.62 Hz, C), 149.20 (CH<sup>A</sup>), 137.79 (C), 137.35 (C), 137.14 (C), 136.77 (C), 136.49 (CH<sup>A</sup>), 135.25 (d, *J*<sub>C-P</sub> = 8.92 Hz, CH<sup>B</sup>), 132.13 (d, *J*<sub>C-P</sub> = 16.02 Hz, C), 129.25 (d, *J*<sub>C-P</sub> = 33.79 Hz, CH), 126.14 (CH), 125.71 (d, *J*<sub>C-P</sub> = 27.09 Hz, CH), 125.40 (d, *J*<sub>C-P</sub> = 8.78 Hz, CH), 125.18 (CH), 121.81 (CH), 121.57 (CH), 121.38 (CH), 120.36 (CH), 119.18 (CH), 115.75 (CH), 32.75 (d, *J*<sub>C-P</sub> = 11.11 Hz, CH), 32.60 (d, *J*<sub>C-P</sub> = 11.29 Hz, CH), 31.06 (d, *J*<sub>C-P</sub> = 19.49 Hz, CH<sub>2</sub>), 30.06 (d, *J*<sub>C-P</sub> = 8.74 Hz, CH<sub>2</sub>), 29.74 (d, *J*<sub>C-P</sub> = 14.97 Hz, CH<sub>2</sub>), 29.16 (d, *J*<sub>C-P</sub> = 7.70 Hz, CH<sub>2</sub>), 27.44 (CH<sub>2</sub>), 27.28 (CH<sub>2</sub>), 27.12 (CH<sub>2</sub>), 27.01 (CH<sub>2</sub>), 26.81 (CH<sub>2</sub>), 26.75 (CH<sub>2</sub>), 26.63 (CH<sub>2</sub>), 26.36 (CH<sub>2</sub>), 26.12 (CH<sub>2</sub>). – <sup>31</sup>P NMR (CDCl<sub>3</sub>, 161 MHz): δ = 8.92 (P<sup>B</sup>), 8.01 (P<sup>A</sup>); *J*<sub>P-Se</sub> = 705.5 Hz. – MS(EI): *m/z* (%) = 392.2 (24) [M<sup>+</sup>],

364.2 (18)  $[M^+ - N_2]$ , 309.2 (74)  $[M^+ - C_6H_{11}]$ , 282.1 (74)  $[M^+ - C_6H_{11} - N_2]$ , 199.1 (100)  $[HM^+ - N_2 - 2 \times C_6H_{11}]$ , 168.1 (58)  $[HM^+ - N_2 - P(C_6H_{11})_2]$ . – HRMS ESI-[TOF] for  $C_{23}H_{29}N_4P$   $[M+H]^+$ : calc 393.2203; found 393.2145,  $[M+O+Li]$ : calcd. 415.2245; found. 415.2161.

**7-(Di(*p*-methoxyphenyl)phosphino)-3-(pyridin-2'-yl)-[1,2,3]triazolo[1,5-*a*]pyridine (2b-A) and 3-(6'-(di(*p*-methoxyphenyl)phosphino)pyridin-2'-yl)-[1,2,3]triazolo[1,5-*a*]pyridine (2b-B)**

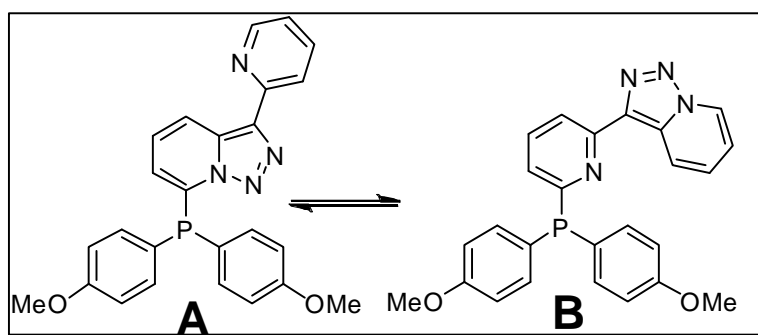

3-(Pyridine-2'-yl)-[1,2,3]triazolo[1,5-*a*]pyridine **1** (0.30 g, 1.5 mmol) and diphenylphosphine chloride were used affording 0.13 g (10%) of **2b** after chromatography; A/B ratio = 1.23. –  $^1H$  NMR (300 MHz,  $CDCl_3$ ):  $\delta$  = 8.7-8.6 (m,  $H^{6A}+H^{7B}+H^{4A}$ ), 8.32 (d,  $J$  = 8.0 Hz,  $H^{3A}$ ), 8.19 (d,  $J$  = 7.9 Hz,  $H^{3B}$ ), 7.8-7.7 (m,  $H^{4B}+H^{4A}$ ), 7.66 (ddd,  $J$  = 7.9, 7.8, 2.5 Hz,  $H^{4B}$ ), 7.5-7.3 (m, (Ph)), 7.3-7.1 (m,  $H^{5B}+H^{5A}+H^{5A}$ ), 7.1-6.9 (m,  $H^{5B}+H^{6B}+$  Ph), 6.48 (d,  $J$  = 6.8 Hz,  $H^{6A}$ ), 3.82 (s,  $3H^B$ ), 3.80 (s,  $3H^A$ ). –  $^{13}C$  NMR (75.5 MHz,  $CDCl_3$ ):  $\delta$  = 164.06 (C), 160.96 (C-OMe), 160.46 (C-OMe), 152.14 (C), 152.03 (d,  $J_{C-P}$  = 8.54 Hz, C), 149.11 (CH), 140.19 (C), 139.88 (C), 137.34 (C), 137.14 (d,  $J_{C-P}$  = 1.95 Hz, 1C), 136.59 (C), 136.55 (CH), 136.18-135.78 (m), 135.54 (C), 134.09 (d,  $J$  = 10.99 Hz, C), 132.14 (C), 131.83 (C), 127.67 (d,  $J_{C-P}$  = 6.50 Hz, C), 126.25 (d,  $J$  = 27.01 Hz, CH), 125.85 (CH), 124.80 (CH), 123.47 (d,  $J$  = 5.02 Hz, C), 122.00-121.71 (m), 121.14 (CH), 120.56 (CH), 120.44 (CH), 118.32 (CH), 115.79 (CH), 114.70-113.86 (m), 55.38 (OMe), 55.25 (OMe). –  $^{31}P$  NMR ( $CDCl_3$ , 161 MHz):  $\delta$  = -0.35 ( $P^B$ ), -17.62 ( $P^A$ );  $J_{P-Se}$  = 725.4 Hz.

– MS(EI):  $m/z$  (%) = 440.1 (87) [ $M^+$ ], 412.1 (64) [ $M^+ - N_2$ ], 411.1 (100) [ $M^+ - H - N_2$ ], 305.1 (48) [ $M^+ - MeOPh - N_2$ ], 245.1 (98) [ $P(p-MeOPh)_2$ ]. – HRMS ESI-[TOF] for  $C_{25}H_{21}N_4O_2P$  [ $M+H$ ]: calcd. 441.1480; found. 441.1421.  $C_{25}H_{21}N_4O_2P$  [ $M+Li+O$ ]: calcd. 463.1511; found. 463.1446.

**7-(Diisopropylphosphino)-3-(pyridin-2'-yl)-[1,2,3]triazolo[1,5-a]pyridine (2c-A) and  
3-(6'-(diisopropylphosphino)pyridin-2'-yl)-[1,2,3]triazolo[1,5-a]pyridine (2c-B).**

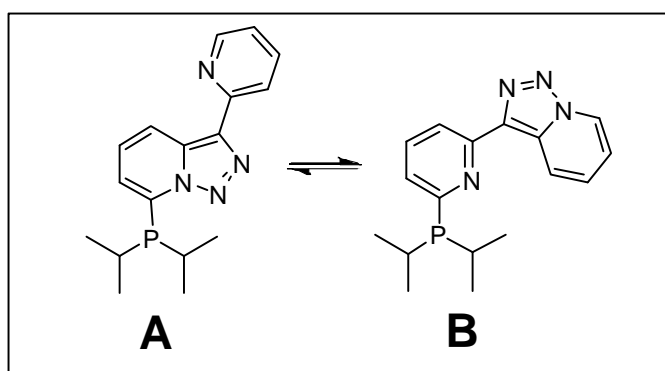

When diisopropylphosphine chloride was used 0.21 g (13%) were obtained after chromatography; A/B ratio = 1.04. –  $^1H$  NMR (300 MHz,  $CDCl_3$ ):  $\delta$  = 8.8-8.7 (m,  $H^{4A} + H^{6A} + H^{7B}$ ), 8.66 (br d,  $J = 4.9$  Hz,  $H^{6A}$ ), 8.37 (br d,  $J = 8.0$  Hz,  $H^{3A}$ ), 8.30 (br d,  $J = 8.0$  Hz,  $H^{3B}$ ), 7.78 (ddd,  $J = 7.9, 7.6, 1.8$  Hz,  $H^{4A}$ ), 7.72 (ddd,  $J = 7.9, 7.7, 1.9$  Hz,  $H^{4B}$ ), 7.5-7.2 (m,  $H^{5A} + H^{5B} + H^{5B} + H^{4B}$ ), 7.20 (ddd,  $J = 7.6, 4.9, 1.2$  Hz,  $H^{5A}$ ), 7.1-7.0 (m,  $H^{6B}$ ), 2.92 (qd,  $J = 13.9, 6.9$  Hz, 1H), 2.5-2.3 (m, 1H), 1.3-1.1 (m, 6H), 0.96 (ddd,  $J = 20.3, 12.5, 6.9$  Hz, 6 H). –  $^{13}C$  NMR (75.5 MHz,  $CDCl_3$ ):  $\delta$  = 160.88 (C), 160.72 (C), 152.04 (d,  $J_{C-P} = 6.13$  Hz, C), 152.0 (CH) 149.15 (CH), 137.96 (C), 137.66 (C), 137.38 (C), 137.19 (C), 136.51 (CH), 135.27 (d,  $J_{C-P} = 8.54$  Hz, CH), 132.07 (d,  $J_{C-P} = 15.42$  Hz, C), 129.01 (d,  $J_{C-P} = 32.52$  Hz, CH), 126.31 (CH), 125.45 (d,  $J_{C-P} = 8.17$  Hz, CH), 125.27 (d,  $J_{C-P} = 26.08$  Hz, CH), 125.15 (CH), 121.83 (CH), 121.62 (CH), 121.14 (CH), 120.34 (CH), 119.32 (CH), 115.73 (CH), 23.06 (d,  $J_{C-P} = 11.26$  Hz, CH), 22.85 (d,  $J_{C-P} = 10.75$  Hz, CH), 20.65 (d,  $J_{C-P} = 15.43$  Hz,  $CH_3$ ), 20.43 (d,  $J_{C-P} = 5.22$  Hz,  $CH_3$ ), 19.68 (d,  $J_{C-P} = 16.83$  Hz,  $CH_3$ ), 19.20 (d,  $J_{C-P} = 9.14$  Hz,  $CH_3$ ). –  $^{31}P$  NMR ( $CDCl_3$ , 161 MHz):  $\delta$  = 17.07 ( $P^B$ ), 16.92 ( $P^A$ );  $J_{P-Se} =$

713.5 Hz. – MS(EI):  $m/z$  (%) = 312.2 (23)  $[M^+]$ , 284.2 (8)  $[M^+ - N_2]$ , 269.2 (95)  $[M^+ - C_3H_7]$ , 241.1 (49)  $[M^+ - C_3H_7 - N_2]$ , 199.1 (100)  $[HM^+ - N_2 - 2 \times C_6H_{11}]$ , 168.1 (29)  $[HM^+ - N_2 - P(C_6H_{11})_2]$ . – HRMS ESI-[TOF] for  $C_{17}H_{21}N_4P$   $[M+Li-N_2]$ : calc 305.1552; found 307.1542,  $C_{17}H_{21}N_4P$   $[M+O+Li]$ : calcd. 335.1613; found.335.1581.

**7-(Diphenylphosphino)-3-(pyridin-2'-yl)-[1,2,3]triazolo[1,5-*a*]pyridine (2d-A) and 3-(6'-(diphenylphosphino)pyridin-2'-yl)-[1,2,3]triazolo[1,5-*a*]pyridine (2d-B)**

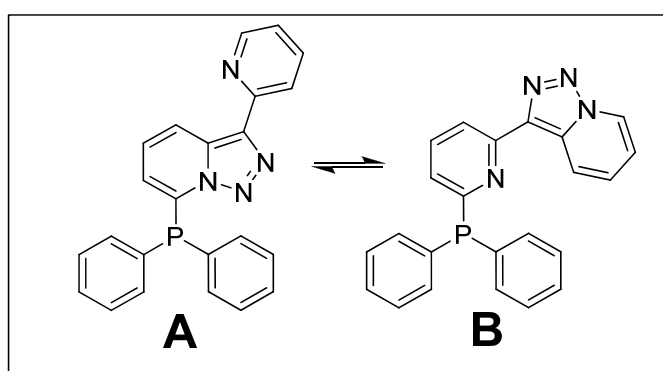

When diphenylphosphine chloride was used 0.79 g (40%) were obtained after chromatography. A/B ratio = 0.72. – <sup>1</sup>H NMR (300 MHz, CDCl<sub>3</sub>): δ = 8.77 (d, *J* = 8.8 Hz, H<sup>4A</sup>), 8.69 (app d, *J* = 6.3 Hz, H<sup>6'A</sup>+H<sup>7B</sup>), 8.38 (d, *J* = 8.0 Hz, H<sup>3'A</sup>), 8.31 (d, *J* = 8.0 Hz, H<sup>3'B</sup>), 7.8-7.6 (m, H<sup>4'A</sup> + H<sup>4'B</sup> + H<sup>4B</sup>), 7.6-7.3 (m, (PPh<sub>2</sub>)<sup>A</sup> + (PPh<sub>2</sub>)<sup>B</sup>), 7.3-7.2 (m, H<sup>5A</sup> + H<sup>5'B</sup>), 7.2-7.1 (m, H<sup>5'A</sup>), 7.1-7.0 (app t, *J* = 8.6, Hz, H<sup>5B</sup>), 6.94 (app t, *J* = 6.8, Hz, H<sup>6B</sup>), 6.55 (d, *J* = 6.8 Hz, H<sup>6A</sup>). – <sup>13</sup>C NMR (75.5 MHz, CDCl<sub>3</sub>): δ = 162.74 (s, 2 C), 152.12 (d, *J* = 8.61 Hz, C), 151.91 (C), 149.02 (CH<sup>A</sup>), 138.66 (d, *J*<sub>C-P</sub> = 23.20 Hz, C), 137.20 (d, *J*<sub>C-P</sub> = 1.84 Hz, C), 136.98 (C), 136.31 (CH<sup>A</sup>), 136.30 (d, *J*<sub>C-P</sub> = 9.69 Hz, C(PPh<sub>2</sub>)), 135.96 (d, *J*<sub>C-P</sub> = 5.81 Hz, CH<sup>A</sup>), 134.29 (d, *J* = 19.71 Hz, CH (PPh<sub>2</sub>)), 134.03 (d, *J* = 20.48 Hz, CH<sup>B</sup>), 132.31 (d, *J*<sub>C-P</sub> = 8.31 Hz, C), 131.96 (C), 131.66 (C), 129.66 (CH<sup>B</sup>), 128.79 (CH(PPh<sub>2</sub>)), 128.74 (d, *J*<sub>C-P</sub> = 7.78 Hz, CH<sup>B</sup>), 128.39 (d, *J*<sub>C-P</sub> = 7.34 Hz, CH(PPh<sub>2</sub>)), 126.54 (d, *J*<sub>C-P</sub> = 27.79 Hz, CH(PPh<sub>2</sub>)<sup>A</sup>), 125.96 (CH<sup>B</sup>), 125.72 (CH<sup>A</sup>), 124.63 (CH<sup>A</sup>), 121.55 (d, *J*<sub>C-P</sub> = 22.59 Hz, CH<sup>A</sup>), 121.37 (CH<sup>B</sup>), 120.68 (CH<sup>A</sup>), 120.30 (CH<sup>A</sup>), 118.52 (CH<sup>B</sup>), 115.63 (CH<sup>B</sup>). – <sup>31</sup>P NMR (CDCl<sub>3</sub>, 161 MHz): δ = -0.30 (P<sup>B</sup>), -14.77 (P<sup>A</sup>); *J*<sub>P-Se</sub> = 736.4 Hz. – MS(EI):  $m/z$  (%) =

380 (66)  $[M^+]$ , 352 (67)  $[M^+ - N_2]$ , 275.1(8)  $[M^+ - Ph - N_2]$ , 183.1 (100). – HRMS ESI-  
[TOF] for  $C_{23}H_{17}N_4P$   $[M^+ + O + Li]$ : calcd. 403.1300; found. 403.1230.

**7-(Di(*p*-methylphenyl)phosphino)-3-(pyridin-2'-yl)-[1,2,3]triazolo[1,5-*a*]pyridine (2e-A) and 3-(6'-(di(*p*-methylphenyl)phosphino)pyridin-2'-yl)-[1,2,3]triazolo[1,5-*a*]pyridine (2e-B)**

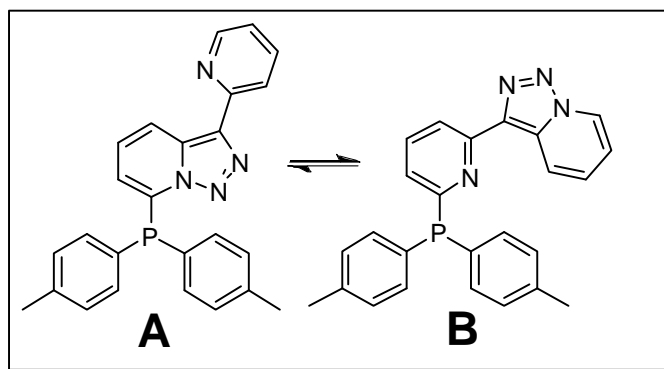

3-(Pyridine-2'-yl)-[1,2,3]triazolo[1,5-*a*]pyridine **1** (0.30 g, 1.5 mmol) and diphenylphosphine chloride were used affording 0.14 g (22%) of **2e** after chromatography; A/B ratio = 0.71. –  $^1H$  NMR (300 MHz,  $CDCl_3$ ):  $\delta$  = 8.7-8.6 (m,  $H^{4A}+H^{6A}+H^{7B}$ ), 8.33 (br d,  $J$  = 8.1 Hz,  $H^{3'A}$ ), 8.22 (br d,  $J$  = 7.9, Hz,  $H^{3'B}$ ), 7.8-7.7 (m,  $H^{4B}+H^{4'A}$ ), 7.67 (ddd,  $J$  = 7.9, 7.8, 2.5 Hz,  $H^{4'B}$ ), 7.4-7.3 (m,  $H^{5'A}+H^{5A}+(p\text{-MePh})$ ), 7.2-7.1 (m,  $H^{5'B}+(p\text{-MePh})$ ), 7.1-6.9 (m,  $H^{6B}+H^{5B}$ ), 6.42 (d,  $J$  = 6.8 Hz,  $H^{6A}$ ), 2.38 (s,  $3H^B$ ), 2.36 (s,  $3H^A$ ). –  $^{13}C$  NMR (75.5 MHz,  $CDCl_3$ ):  $\delta$  = 163.56 (C), 152.15 (C), 152.03 (C), 149.09 (CH), 139.87 (C), 139.74 (C), 139.43 (C), 137.35 (C), 136.54 (CH), 136.01 (d,  $J_{C-P}$  = 5.36 Hz, CH), 134.45 (d,  $J_{C-P}$  = 20.16 Hz, CH), 134.17 (d,  $J_{C-P}$  = 21.50 Hz, CH), 133.12 (d,  $J_{C-P}$  = 8.19 Hz, C), 132.15 (s, C), 131.83 (C), 129.69 (d,  $J_{C-P}$  = 8.08 Hz, CH), 129.31 (d,  $J_{C-P}$  = 7.60 Hz, CH), 129.06 (d,  $J_{C-P}$  = 6.81 Hz, C), 126.46 (d,  $J_{C-P}$  = 26.41 Hz, CH), 125.86 (CH), 125.79 (CH), 124.81 (CH), 121.89-121.75 (m), 121.30 (CH), 120.61-120.48 (m), 118.46 (CH), 115.74 (CH), 21.34 ( $CH_3$ ), 21.01 ( $CH_3$ ). –  $^{31}P$  NMR ( $CDCl_3$ , 161 MHz):  $\delta$  = -2.06 ( $P^B$ ), -16.34 ( $P^A$ );  $J_{P-Se}$  = 729.6 Hz. – MS(EI):  $m/z$  (%) = 408.2 (72)  $[M^+]$ , 396 (100)  $[OM^+ - N_2]$ , 396.2 (100)  $[MO^+$

- N<sub>2</sub>], 380.2 (68) [M<sup>+</sup>- N<sub>2</sub>], 289.1(53) [M<sup>+</sup>- *p*-MePh - N<sub>2</sub>]. – HRMS ESI-[TOF] for C<sub>25</sub>H<sub>21</sub>N<sub>4</sub>P [M+Li+O]: calcd. 431.1613; found. 431.1537.

**7-(Di(*p*-fluorophenyl)phosphino)-3-(pyridin-2'-yl)-[1,2,3]triazolo[1,5-*a*]pyridine (2f-A)**  
and **3-(6'-(di(*p*-fluorophenyl)phosphino)pyridin-2'-yl)-[1,2,3]triazolo[1,5-*a*]pyridine (2f-B)**

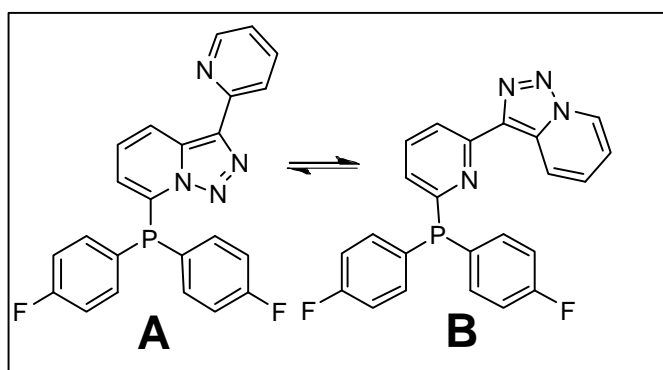

3-(Pyridine-2'-yl)-[1,2,3]triazolo[1,5-*a*]pyridine **1** (0.30 g, 1.5 mmol) and di(*p*-fluorophenyl)phosphine chloride afforded 0.43 g (66%) of **2f** after chromatography; A/B ratio = 0.40. – <sup>1</sup>H NMR (300 MHz, CDCl<sub>3</sub>): δ = 8.74 (d, *J* = 8.9 Hz, H<sup>4A</sup>), 8.68 (d, *J* = 7.0 Hz, H<sup>7B</sup>), 8.65 (d, *J* = 4.9 Hz, H<sup>6'A</sup>), 8.32 (d, *J* = 8.0 Hz, H<sup>3'A</sup>), 8.24 (d, *J* = 8.0 Hz, H<sup>3'B</sup>), 7.8-7.7 (m, H<sup>4'A</sup>), 7.7 (ddd, *J* = 7.9, 7.8, 2.5 Hz, H<sup>4'B</sup>), 7.64 (br d, *J* = 8.9 Hz, H<sup>4B</sup>), 7.42 (m, (Ph-F)), 7.3-7.2 (m, H<sup>5A</sup> + H<sup>5'A</sup> + H<sup>5B</sup>), 7.1-7.0 (m, H<sup>5B</sup> + (Ph-F)), 6.96 (ddd, *J* = 6.9, 6.7, 1.4 Hz, H<sup>6B</sup>), 6.46 (d, *J* = 6.8 Hz, H<sup>6A</sup>). – <sup>13</sup>C NMR (75.5 MHz, CDCl<sub>3</sub>): δ = 163.99 (d, *J*<sub>C-F</sub> = 251.04 Hz, C), 163.58 (d, *J*<sub>C-F</sub> = 249.60 Hz, C), 162.41 (C), 152.40 (d, *J*<sub>C-P</sub> = 8.23 Hz, C), 151.89 (C), 149.16 (CH), 137.05 (C), 136.61-135.97 (m), 132.14-131.75 (m), 126.60 (d, *J*<sub>C-P</sub> = 29.40 Hz, CH), 126.10 (CH), 125.81 (CH), 124.96 (CH), 122.01 (CH), 121.42 (d, *J* = 1.38 Hz, CH), 121.29 (CH), 120.58 (CH), 118.92 (CH), 116.55-115.57 (m). – <sup>31</sup>P NMR (CDCl<sub>3</sub>, 161 MHz): δ = -3.22 (t, *J*<sub>P-F</sub> = 4.03 Hz, P<sup>B</sup>), -17.16 (t, *J*<sub>P-F</sub> = 4.05 Hz, P<sup>A</sup>); *J*<sub>P-Se</sub> = 744.4 Hz. – MS(EI): *m/z* (%) = 416.1 (39) [M<sup>+</sup>], 404.1 (80) [M<sup>+</sup>- N<sub>2</sub> + O], 388.1 (100) [M<sup>+</sup>- N<sub>2</sub>], 293.1(90) [M<sup>+</sup>- *p*-F-Ph - N<sub>2</sub>], 219.1 (65) [M<sup>+</sup>- N<sub>2</sub> - *p*-F-Ph - Py]. – HRMS ESI-[TOF] for C<sub>23</sub>H<sub>15</sub>F<sub>2</sub>N<sub>4</sub>P [M+O+Li]: calcd. 439.1112; found. 439.1081.

**7-(Di(*p*-trifluoromethylphenyl)phosphino)-3-(pyridin-2'-yl)-[1,2,3]triazolo[1,5-a]pyridine (2g-A) and 3-(6'-(di(*p*-trifluoromethylphenyl)phosphino)pyridin-2'-yl)-[1,2,3]triazolo[1,5-a]pyridine (2g-B)**

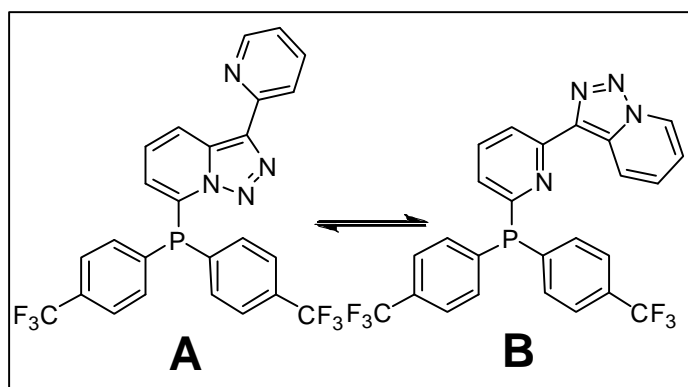

3-(Pyridine-2'-yl)-[1,2,3]triazolo[1,5-a]pyridine **1** (0.30 g, 1.5 mmol) and di(*p*-trifluorophenyl)phosphine chloride were used affording 0.36 g (46%) of **2g** after chromatography; A/B ratio = 0.18. –  $^1\text{H}$  NMR (300 MHz,  $\text{CDCl}_3$ ):  $\delta$  = 8.80 (d,  $J$  = 8.7 Hz,  $\text{H}^{4\text{A}}$ ), 8.7-8.6 (m,  $\text{H}^{7\text{B}}+\text{H}^{6\text{A}}$ ), 8.32 (app d,  $J$  = 8.0 Hz,  $\text{H}^{3\text{A}}+\text{H}^{3\text{B}}$ ), 7.77 (dd,  $J$  = 7.9, 7.7 Hz,  $\text{H}^{4\text{B}}$ ), 7.76 (ddd,  $J$  = 7.9, 7.7, 2.8 Hz,  $\text{H}^{4\text{A}}$ ), 7.7-7.5 (m, (*p*- $\text{CF}_3\text{Ph}$ ) $_2$   $\text{H}^{4\text{B}}$ ), 7.4-7.3 (m,  $\text{H}^{5\text{A}}+\text{H}^{5\text{B}}$ ), 7.21 (dd,  $J$  = 8.7, 6.8 Hz,  $\text{H}^{5\text{A}}$ ), 7.1-6.9 (m,  $\text{H}^{5\text{B}}+\text{H}^{6\text{B}}$ ), 6.53 (d,  $J$  = 6.8 Hz,  $\text{H}^{6\text{A}}$ ). –  $^{13}\text{C}$  NMR (75.5 MHz,  $\text{CDCl}_3$ ):  $\delta$  = 160.34 (C), 152.92 (d,  $J_{\text{C-P}}$  = 7.75 Hz, C), 151.68 (C), 149.19 (CH), 140.82 (d,  $J_{\text{C-P}}$  = 13.06 Hz, C), 137.81 (C), 136.78 (C), 136.71-136.47 (C+CH), 134.54 (d,  $J_{\text{C-P}}$  = 19.91 Hz, CH), 134.46 (d,  $J$  = 21.50 Hz, CH), 132.13 (q,  $^2J_{\text{C-F}}$  = 33.7 Hz, 1  $\text{C}^{\text{A}}$ ), 132.03 (C), 131.8 (C), 131.44 (C), 131.23 (q,  $^2J_{\text{C-F}}$  = 32.6 Hz, 1  $\text{C}^{\text{B}}$ ), 131.01 (C), 130.58 (C), 127.50 (d,  $J_{\text{C-P}}$  = 33.58 Hz, CH), 126.27 (CH), 125.94-125.63 (m), 125.50-125.16 (m), 125.06 (CH), 123.91 (q,  $J_{\text{C-F}}$  = 272,3 Hz, C), 122.19-121.83 (m), 120.78 (CH), 120.60 (CH), 119.71 (CH), 118.50 (CH), 115.90 (CH);  $^{31}\text{P}$  NMR ( $\text{CDCl}_3$ , 161 MHz):  $\delta$  = -1.15 ( $\text{P}^{\text{B}}$ ), -15.31 ( $\text{P}^{\text{A}}$ );  $J_{\text{P-Se}}$  = 760.6 Hz; MS(ED):  $m/z$ (%) = 516.1 (12) [ $\text{M}^+$ ], 488.1 (80) [ $\text{M}^+ - \text{N}_2$ ], 293.1(100) [ $\text{M}^+ - p\text{-CF}_3\text{-Ph} - \text{N}_2$ ]. – HRMS ESI-[TOF] for  $\text{C}_{25}\text{H}_{15}\text{F}_6\text{N}_4\text{P}$  [ $\text{M}+\text{K}$ ]: calcd. 555.0576 ; found. 555.0513.



## Copies of $^1\text{H}$ , $^{13}\text{C}$ , $^{31}\text{P}$ NMR and COSY NMR spectra

### $^1\text{H}$ NMR of 2a:

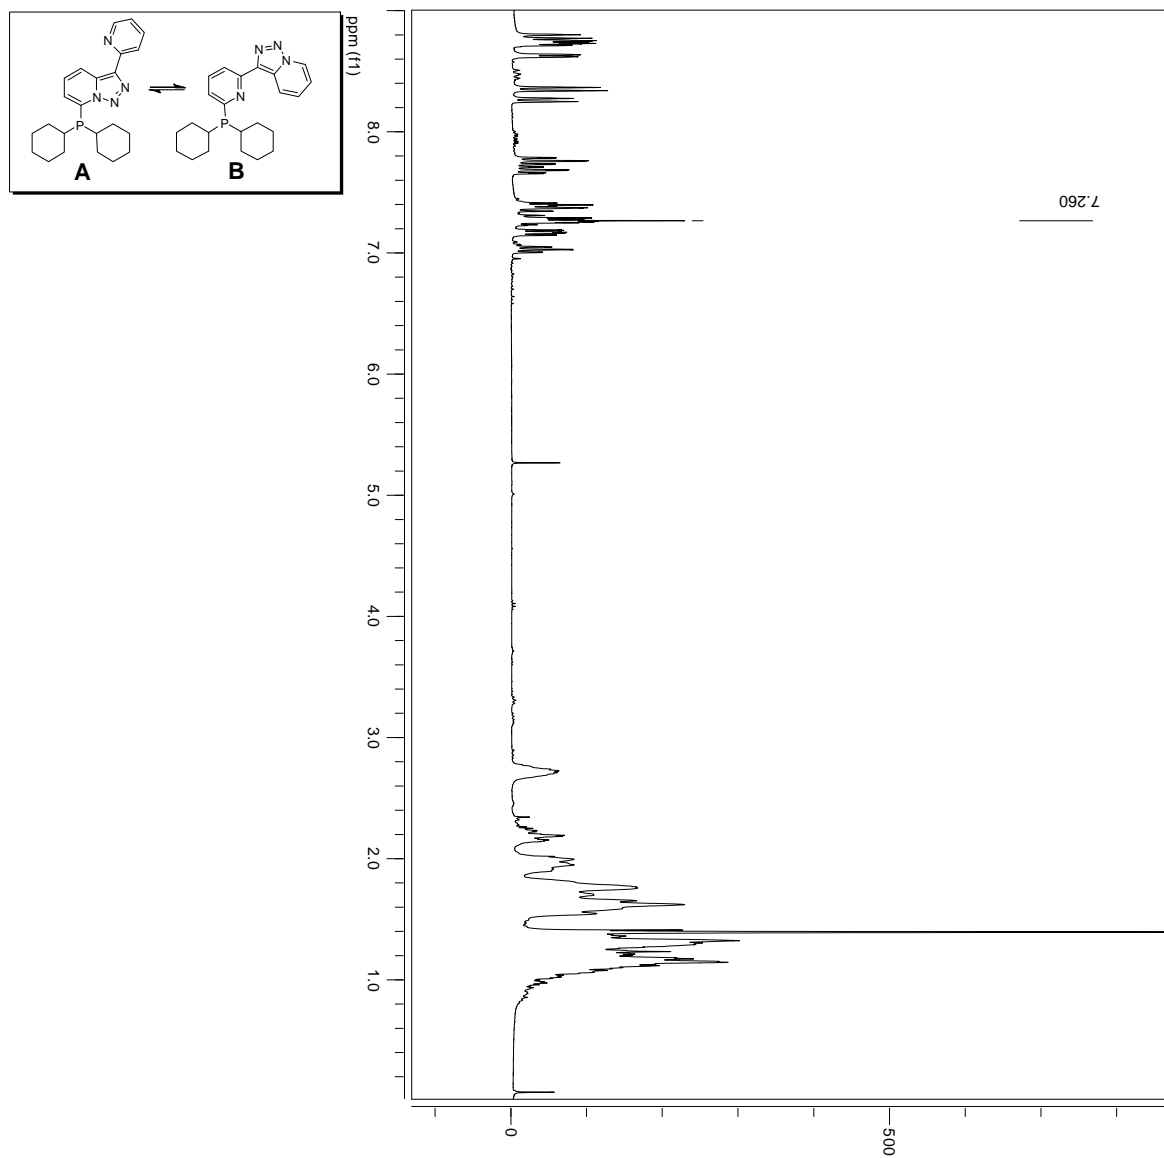

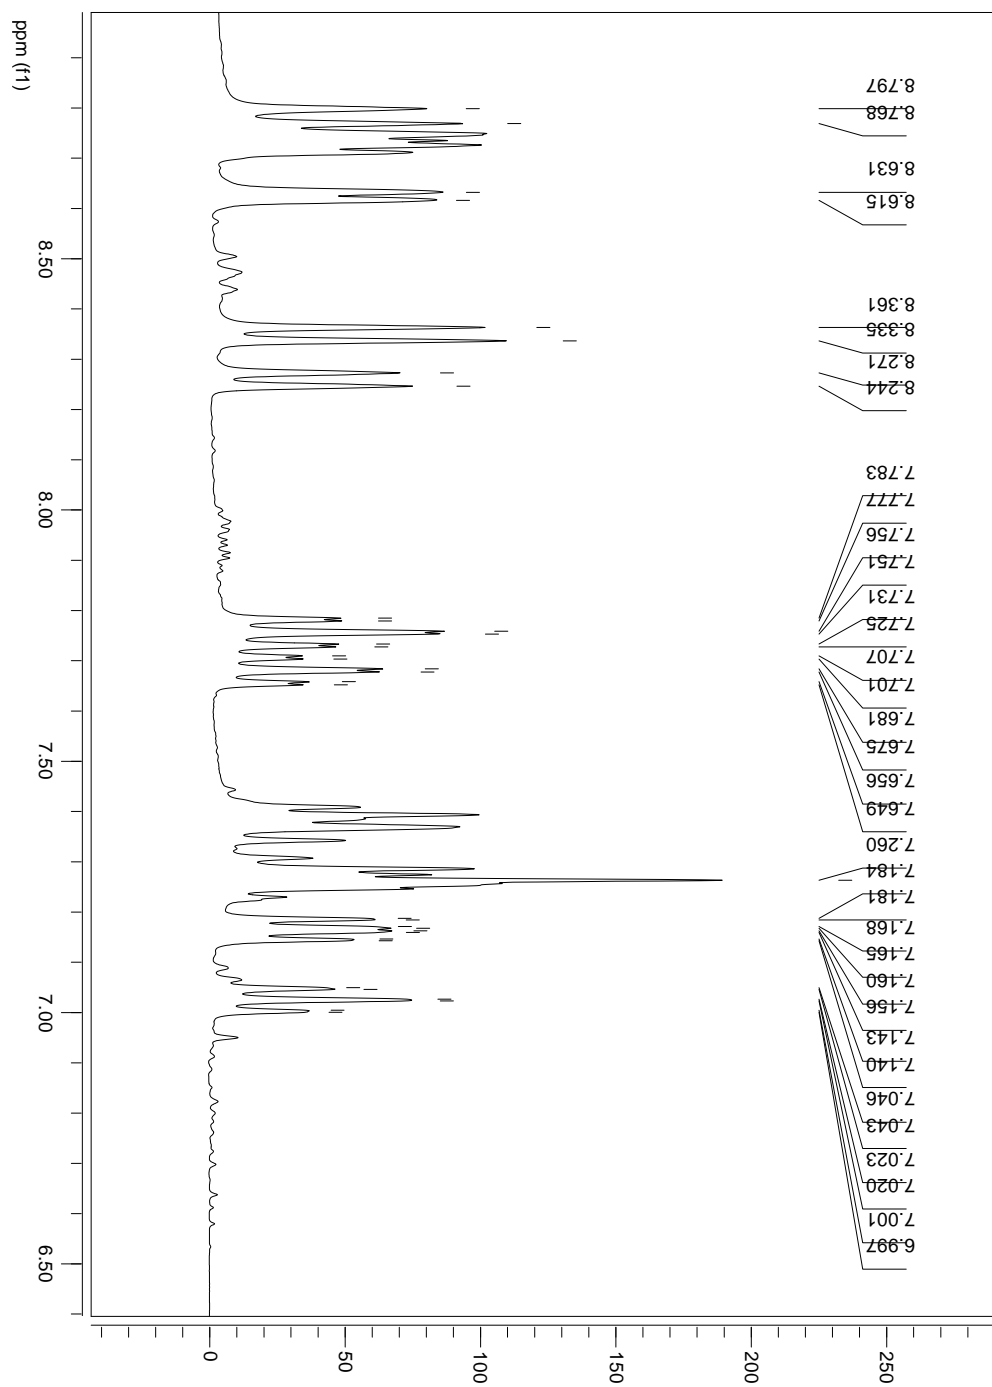

**<sup>13</sup>C NMR DEPT of 2a:**

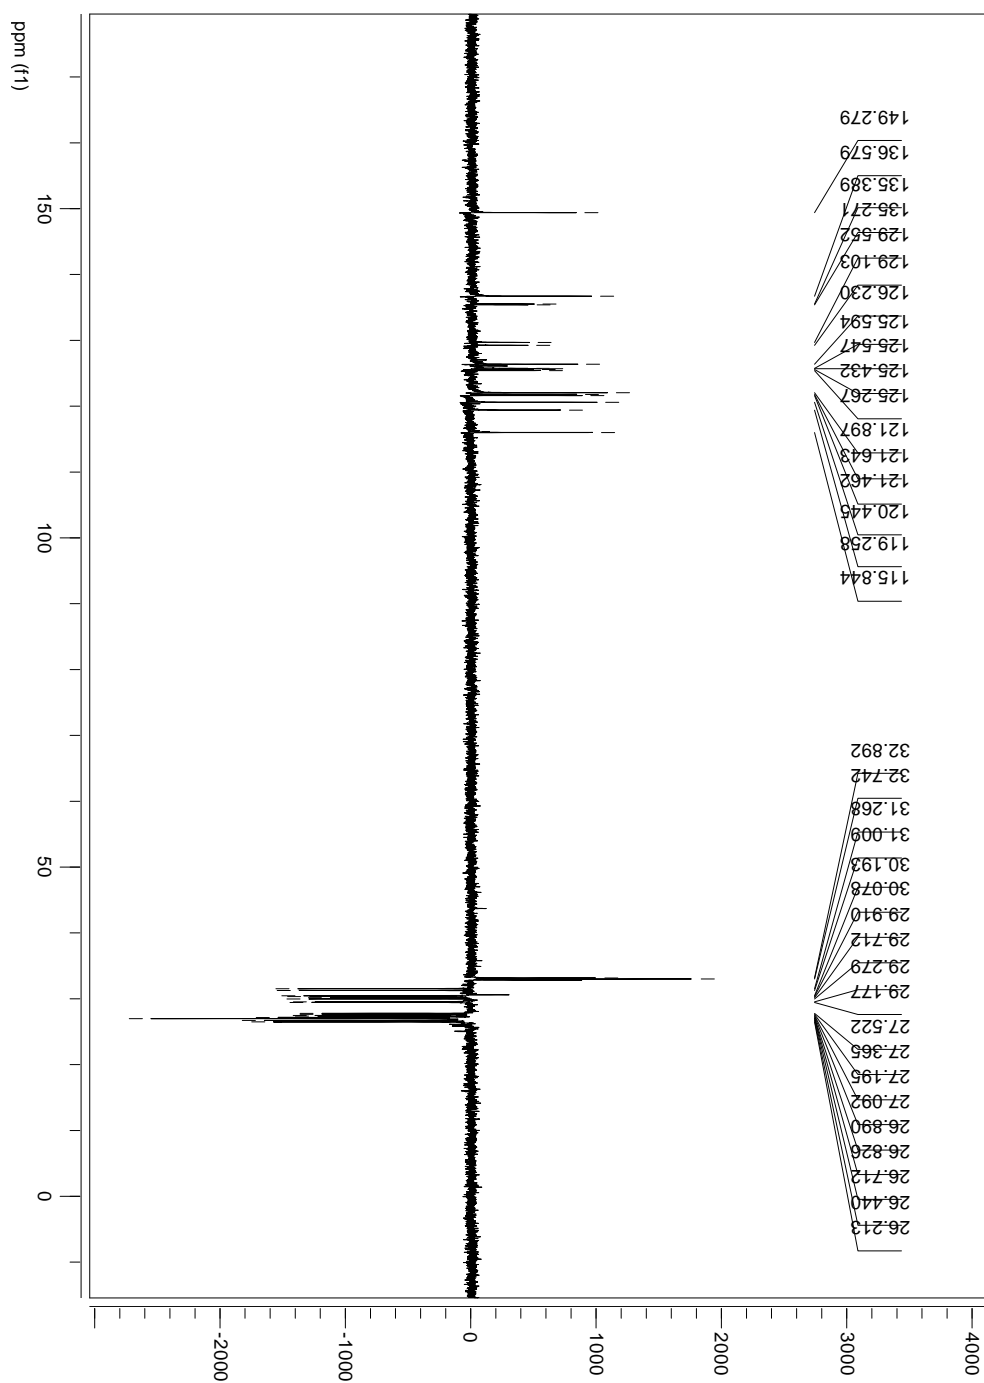

**$^{13}\text{C}$  NMR of 2a:**

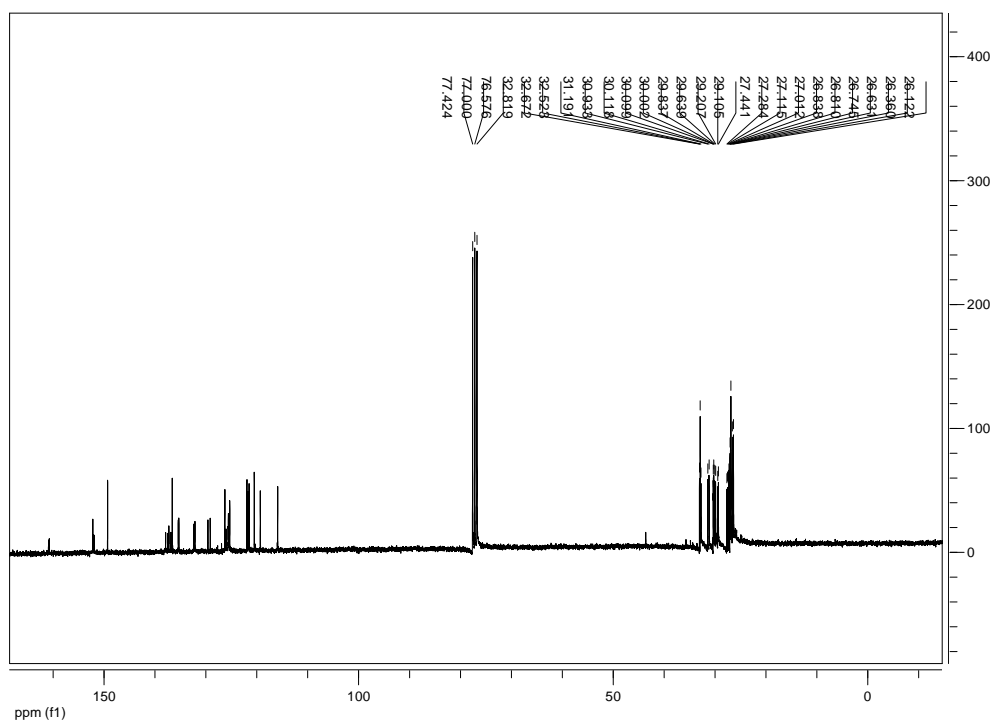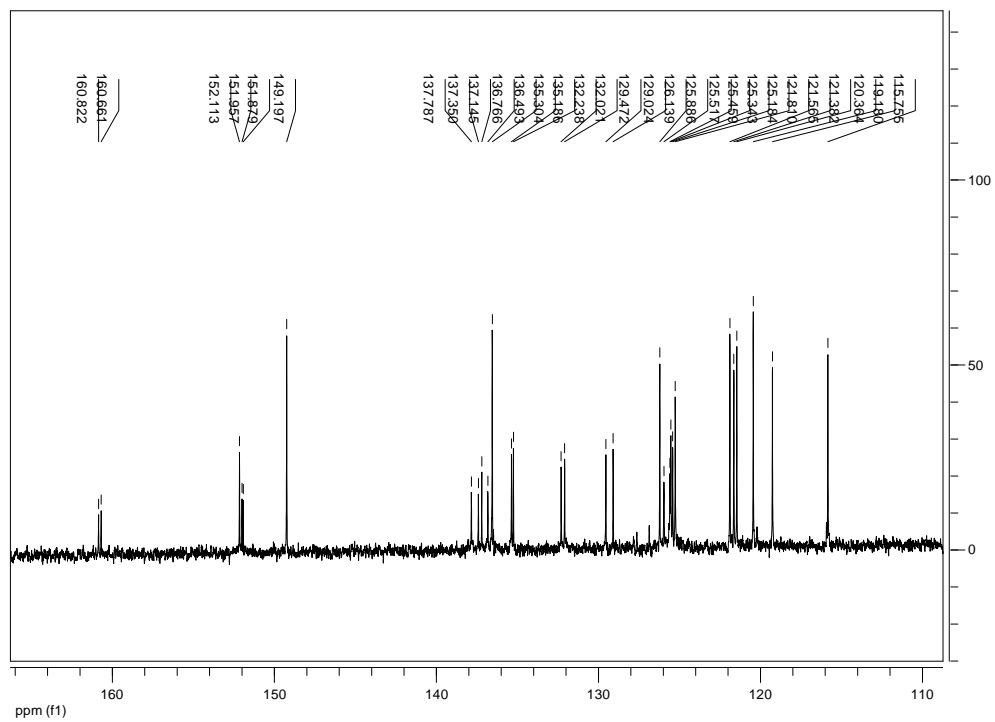

**COSY H-H of 2a:**

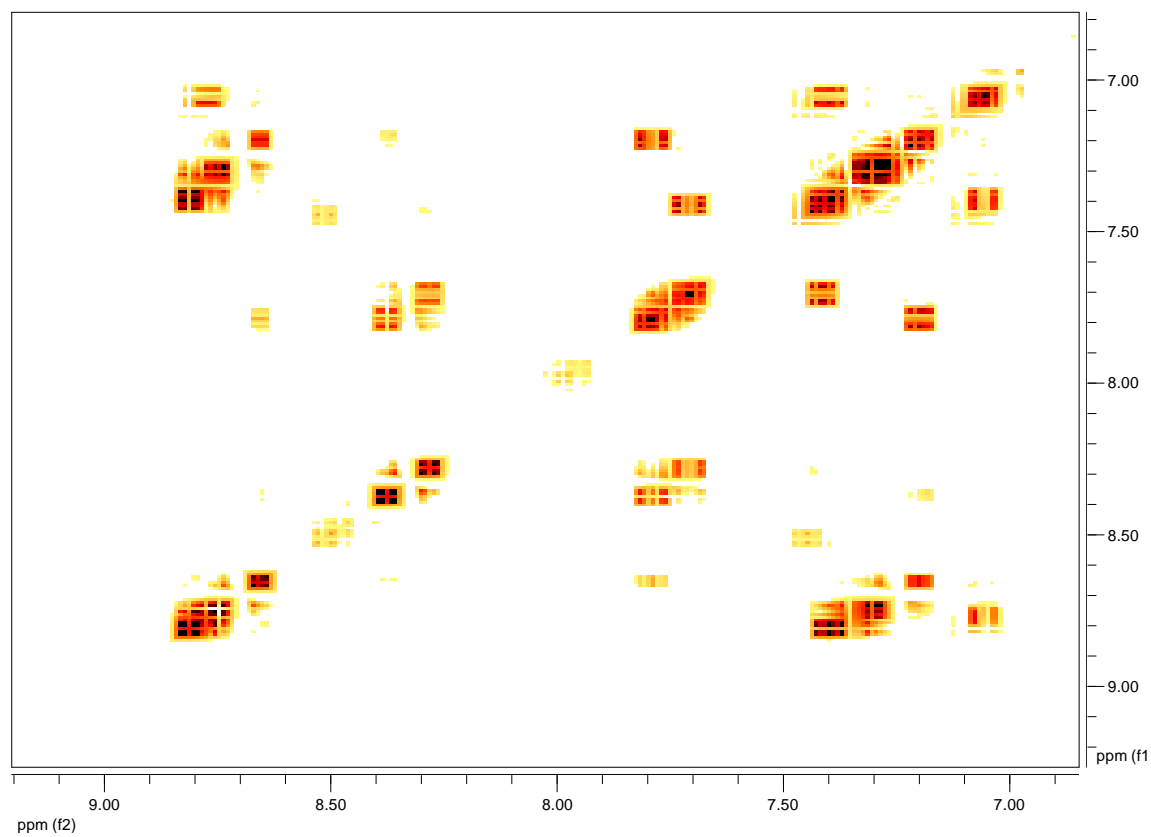

**$^{31}\text{P}$  NMR of 2a:**

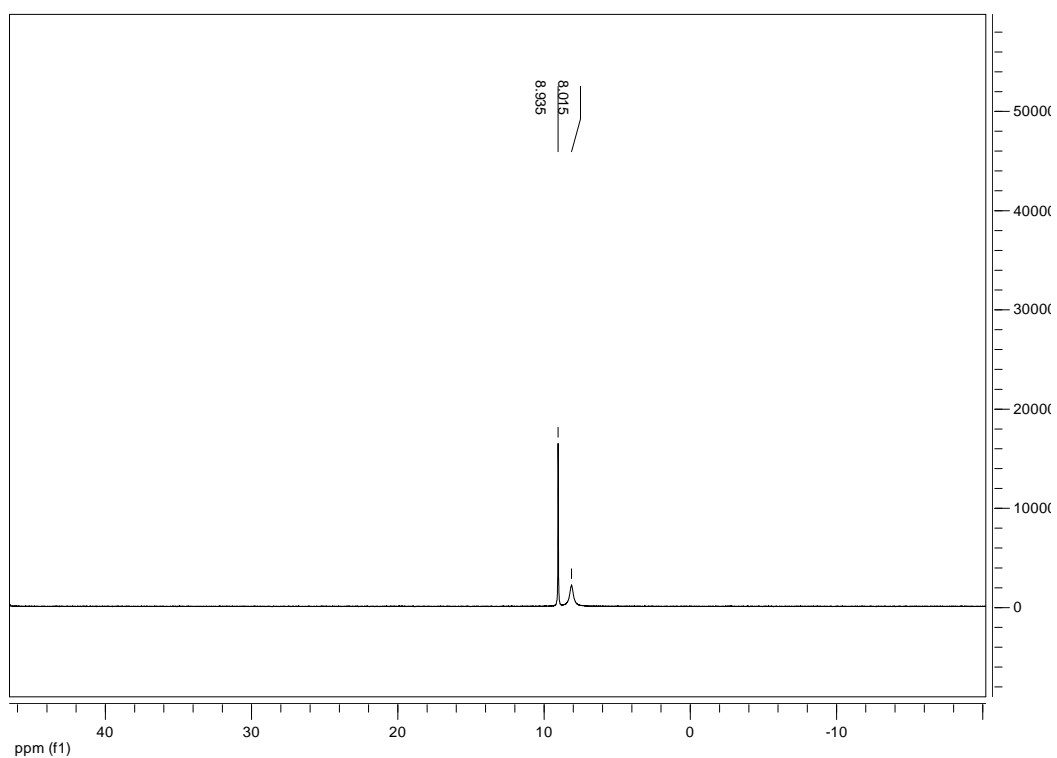

**$^{31}\text{P}$  NMR of 3a:**

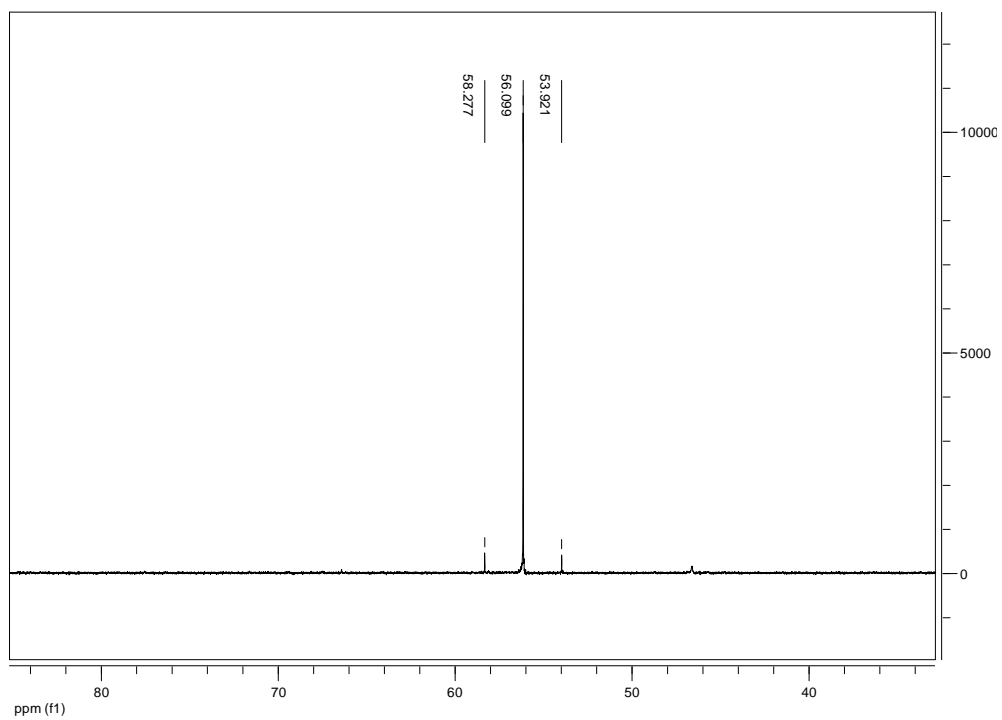

### $^1\text{H}$ NMR of 2b:

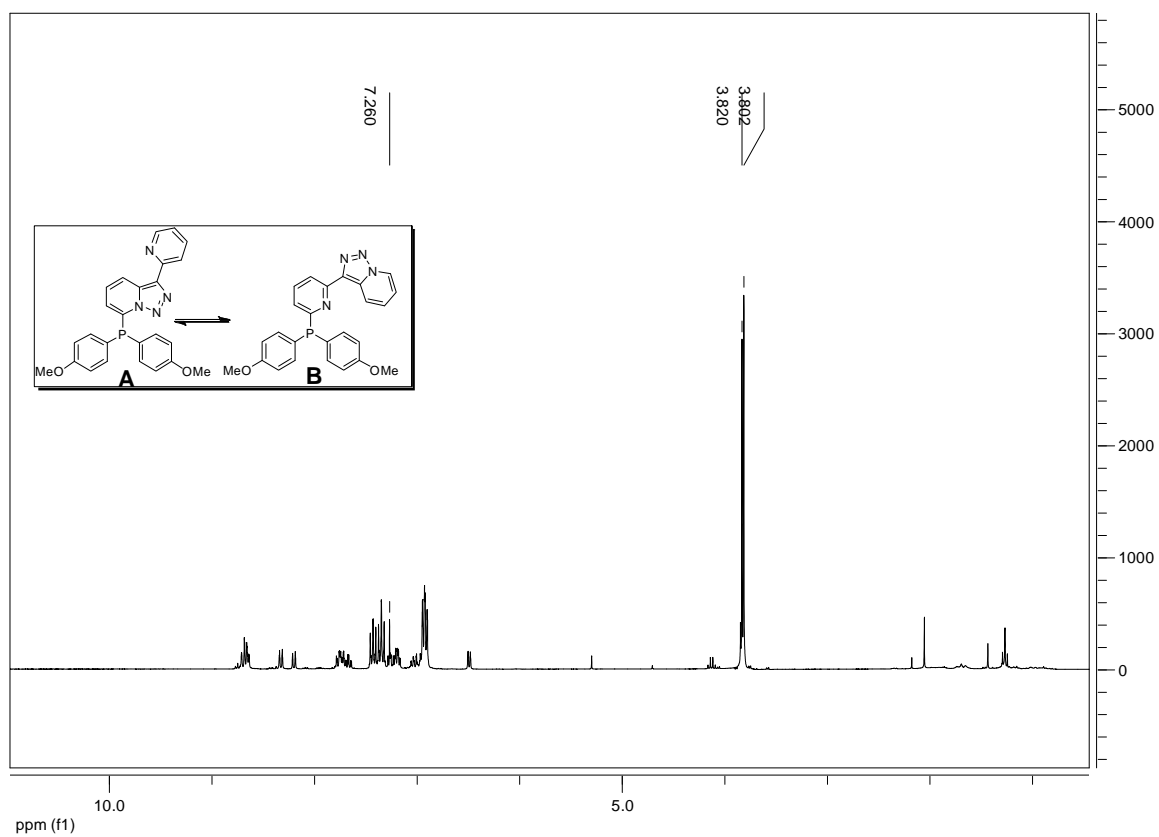

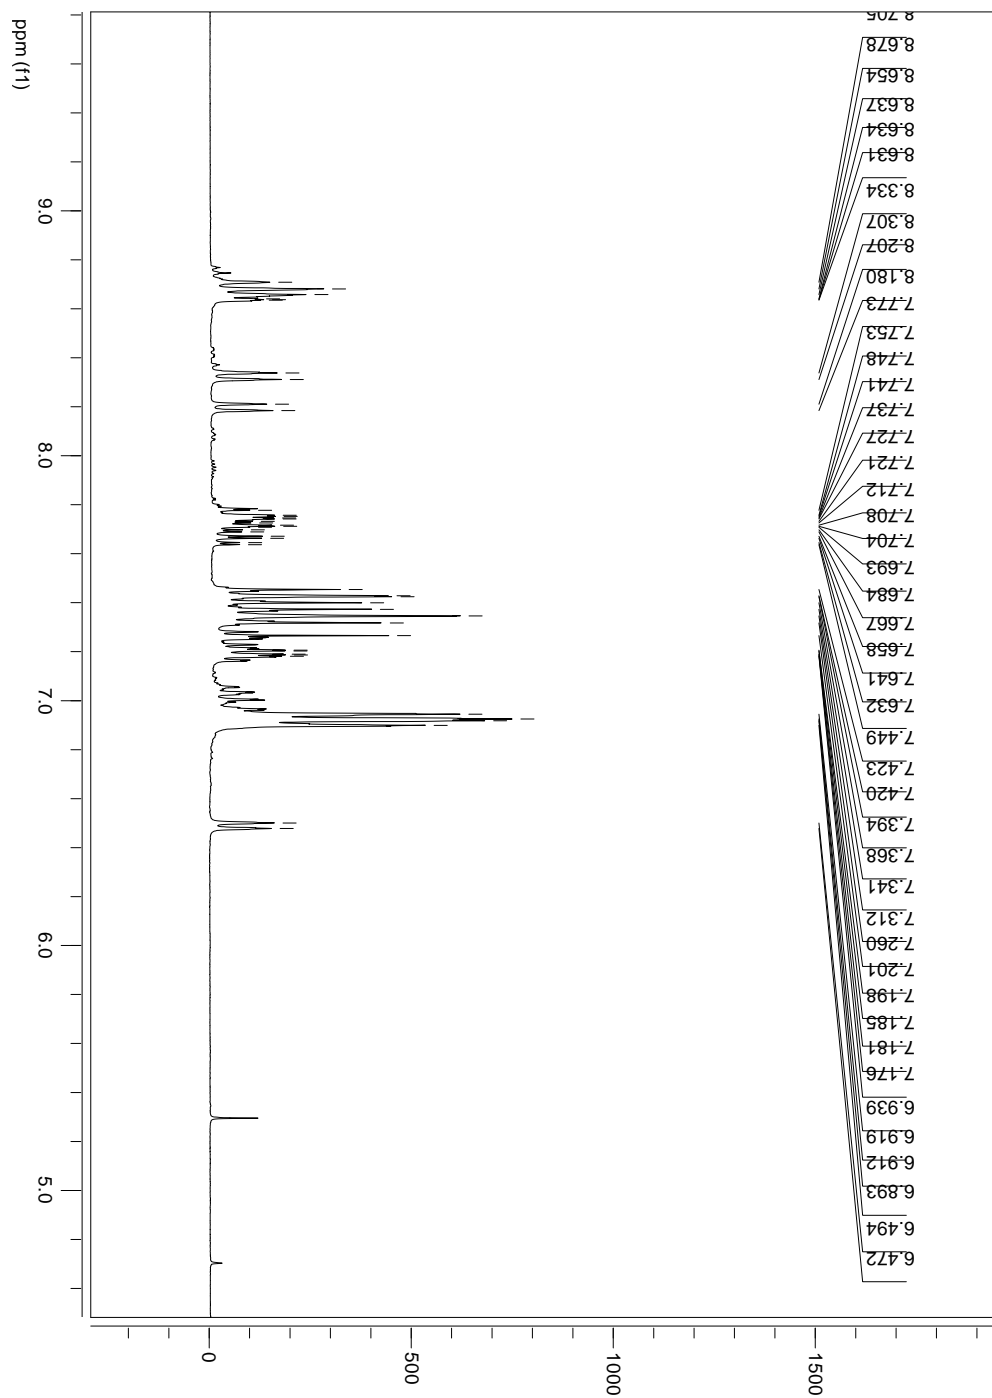



**$^{13}\text{C}$  NMR DEPT of 2b:**

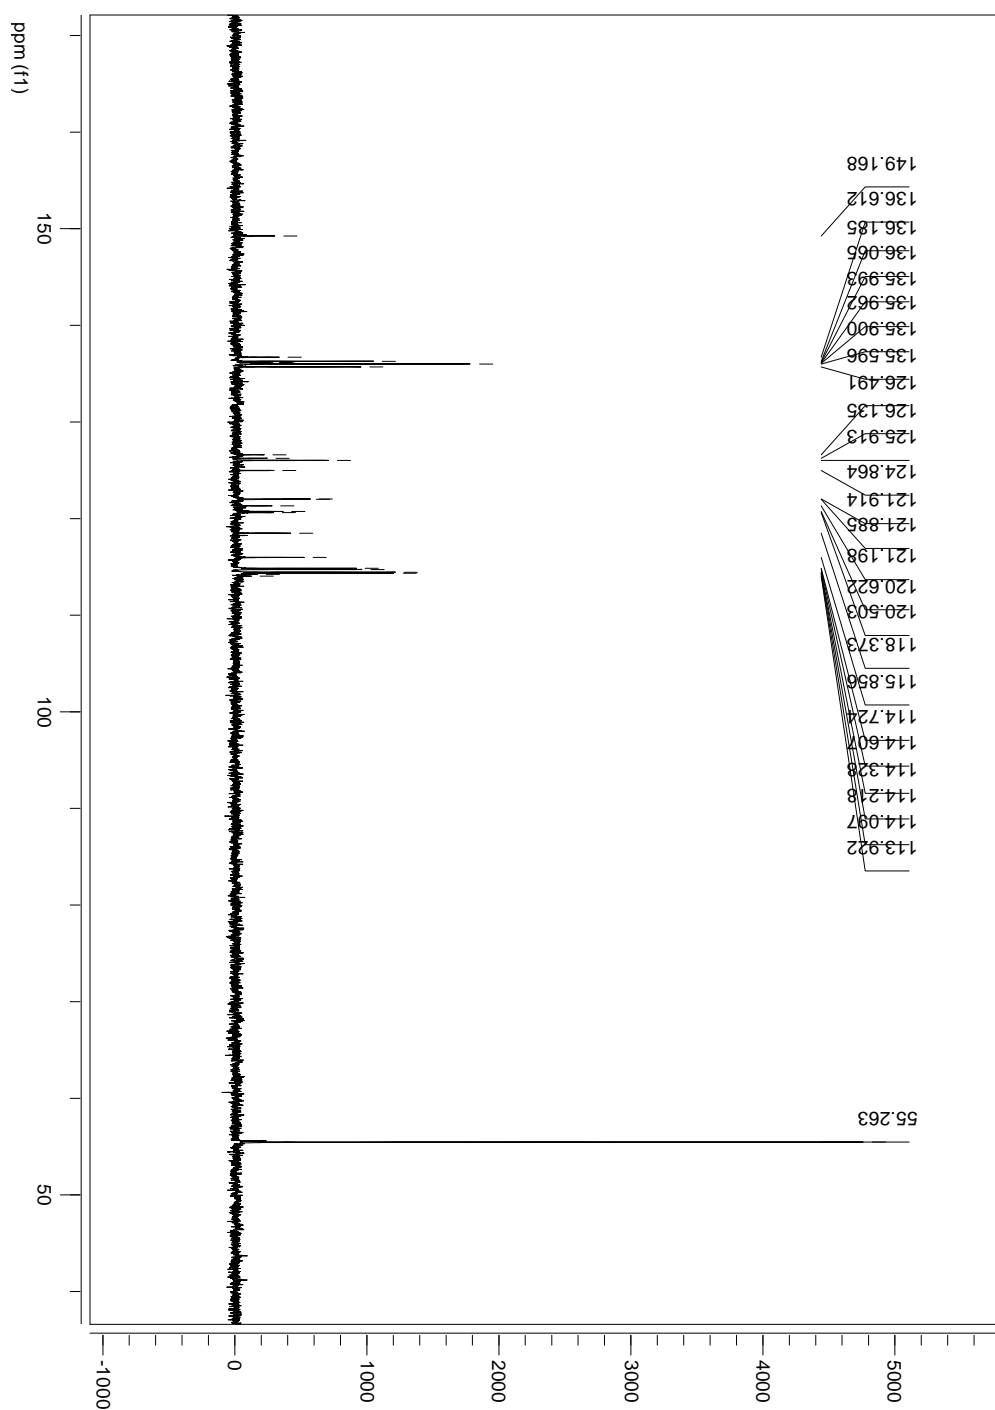

### $^{13}\text{C}$ NMR of 2b:

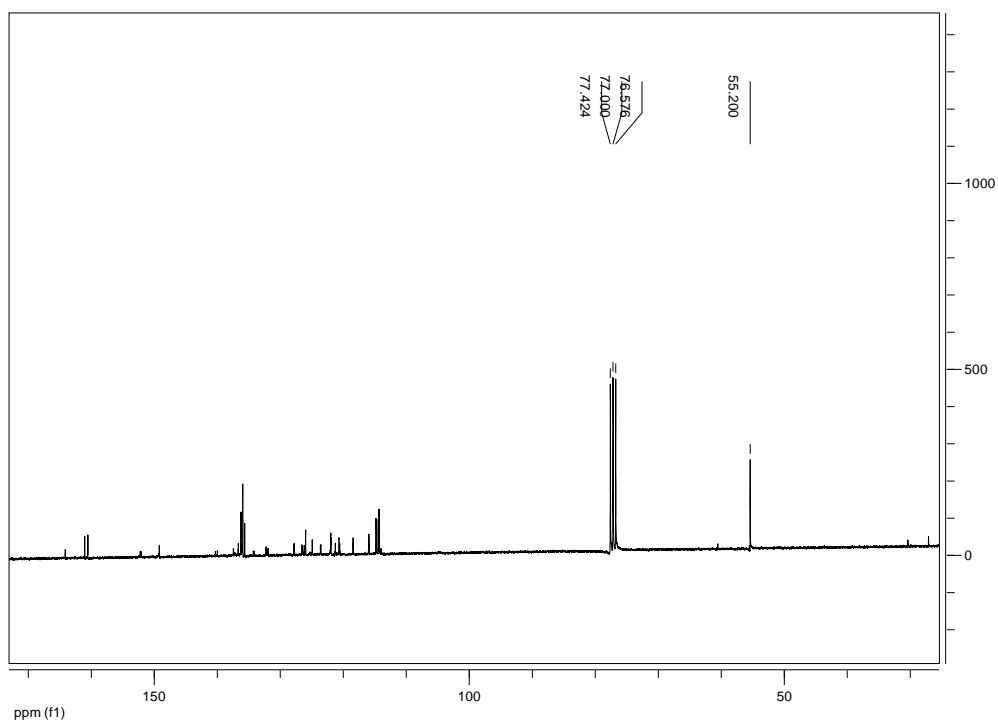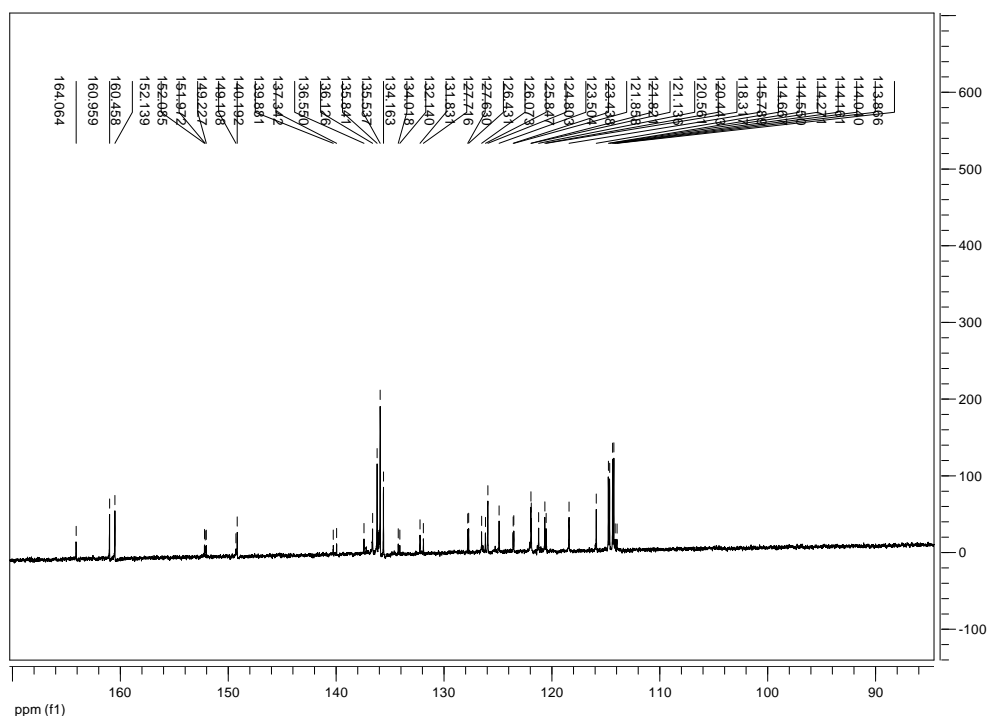

**COSY H-H of 2b:**

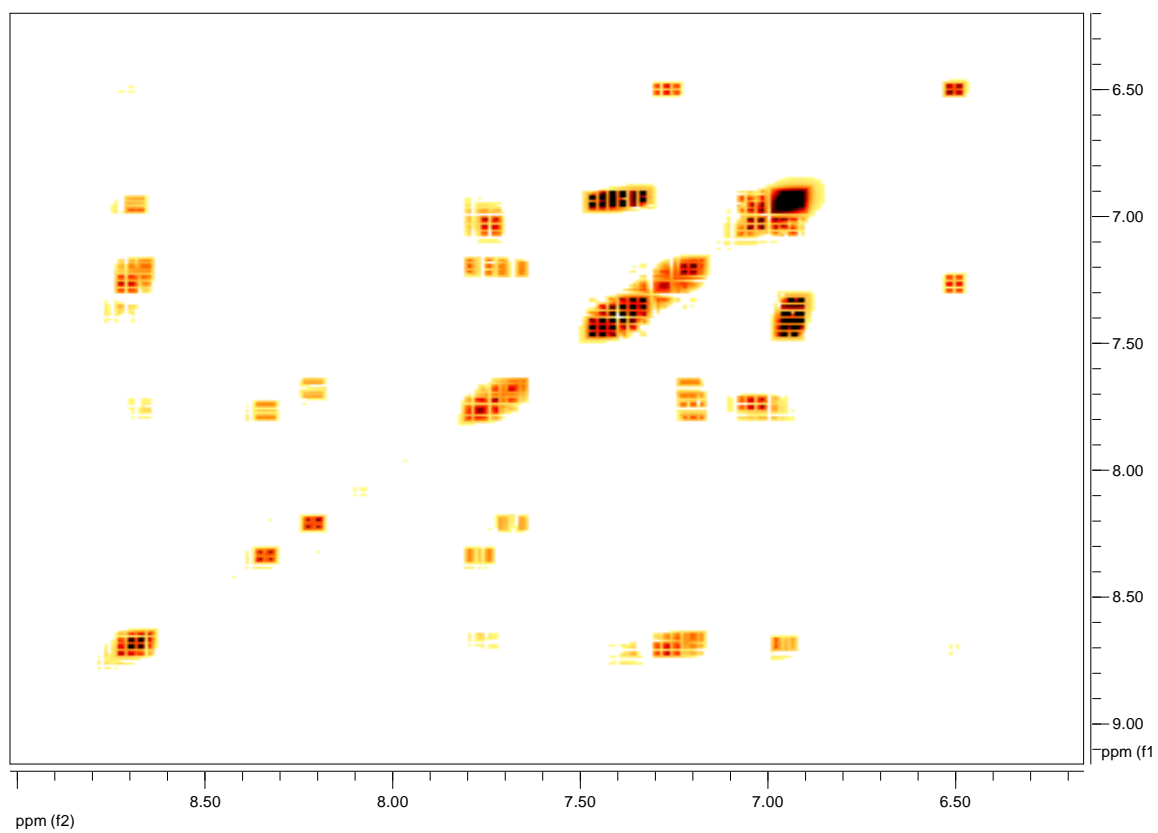

**$^{31}\text{P}$  NMR of 2b:**

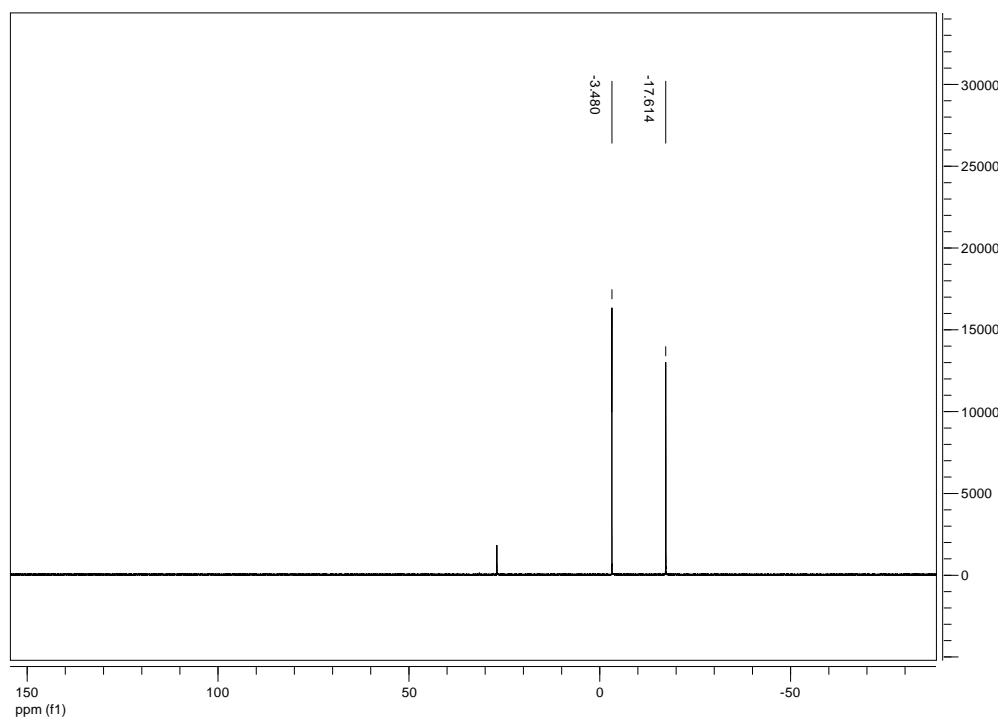

**$^{31}\text{P}$  NMR of 3b:**

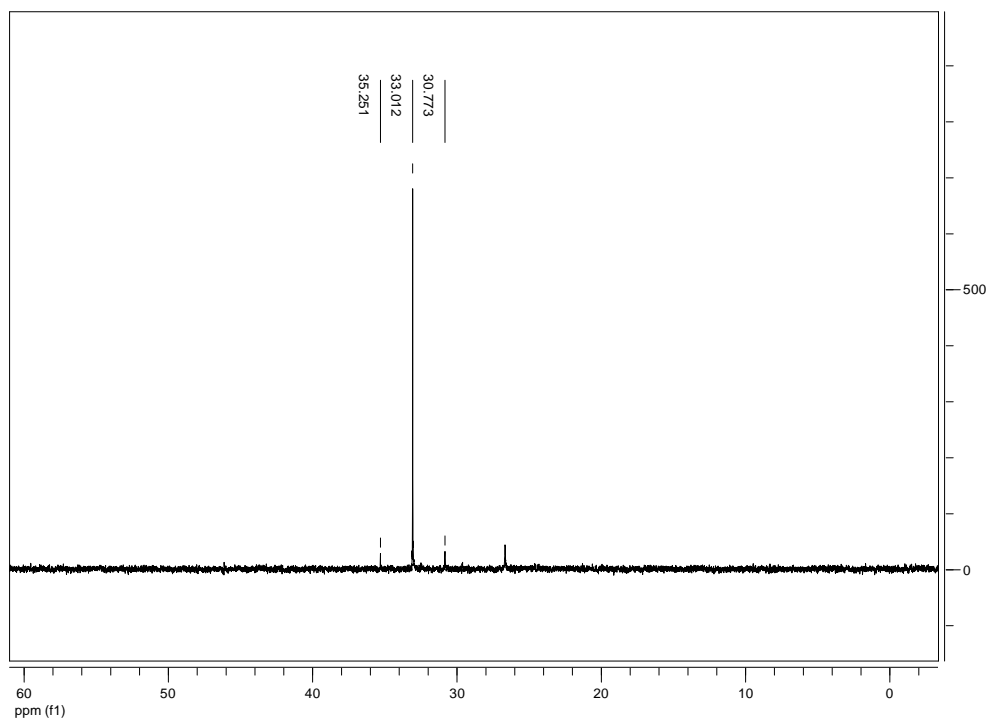

### $^1\text{H}$ NMR of 2c:

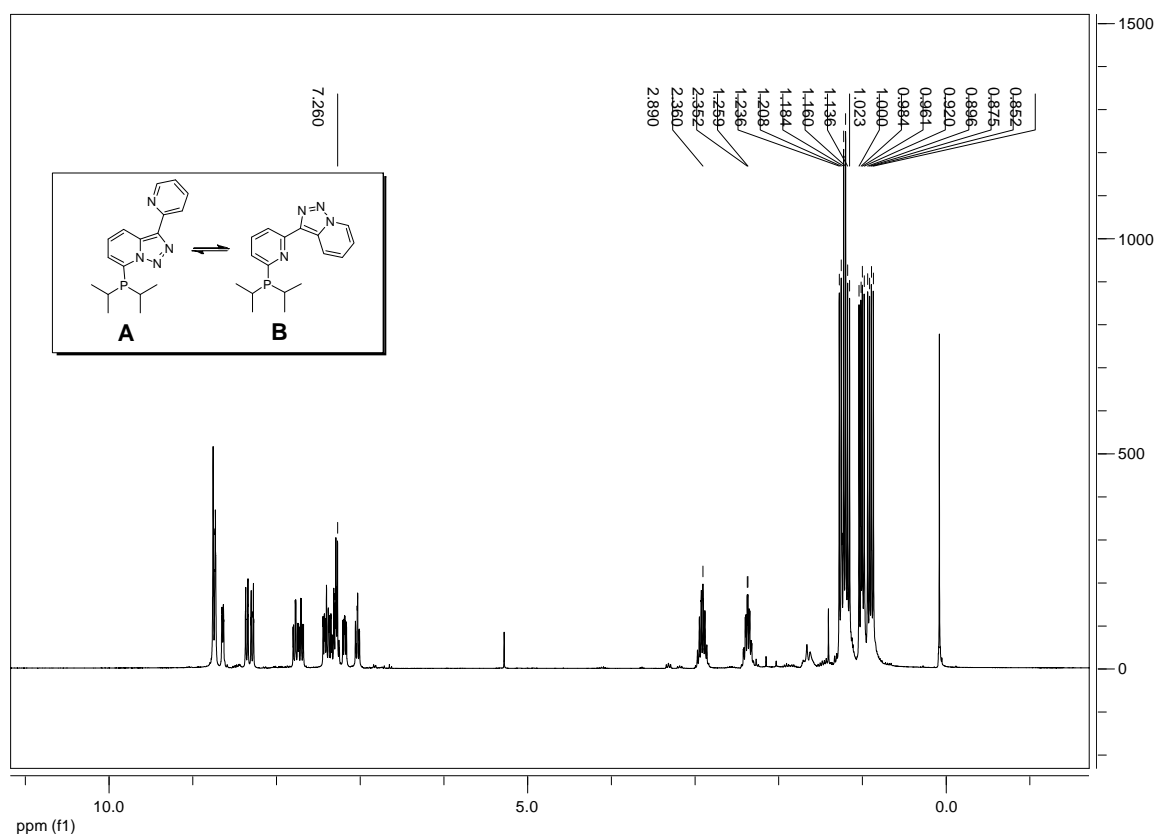



### $^{13}\text{C}$ NMR of 2c:

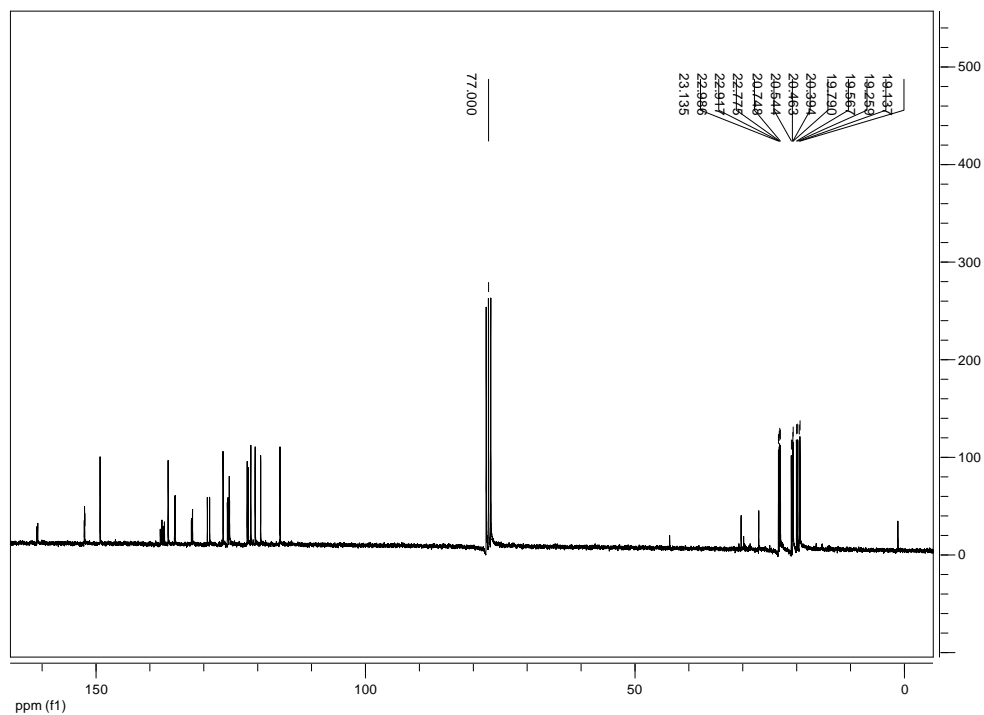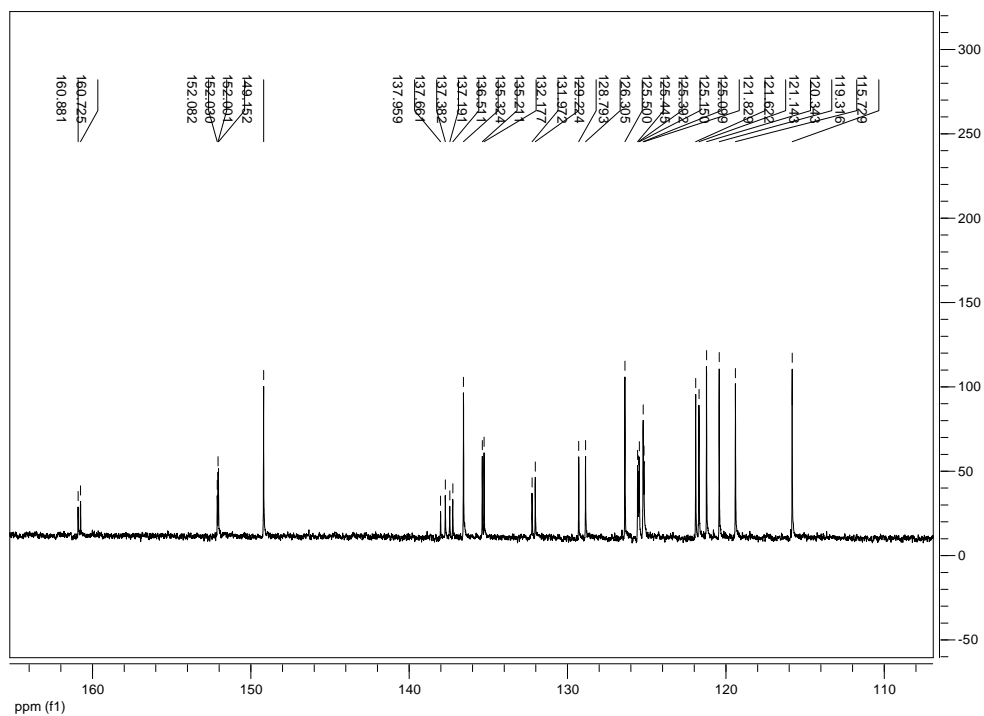

**COSY H-H of 2c:**

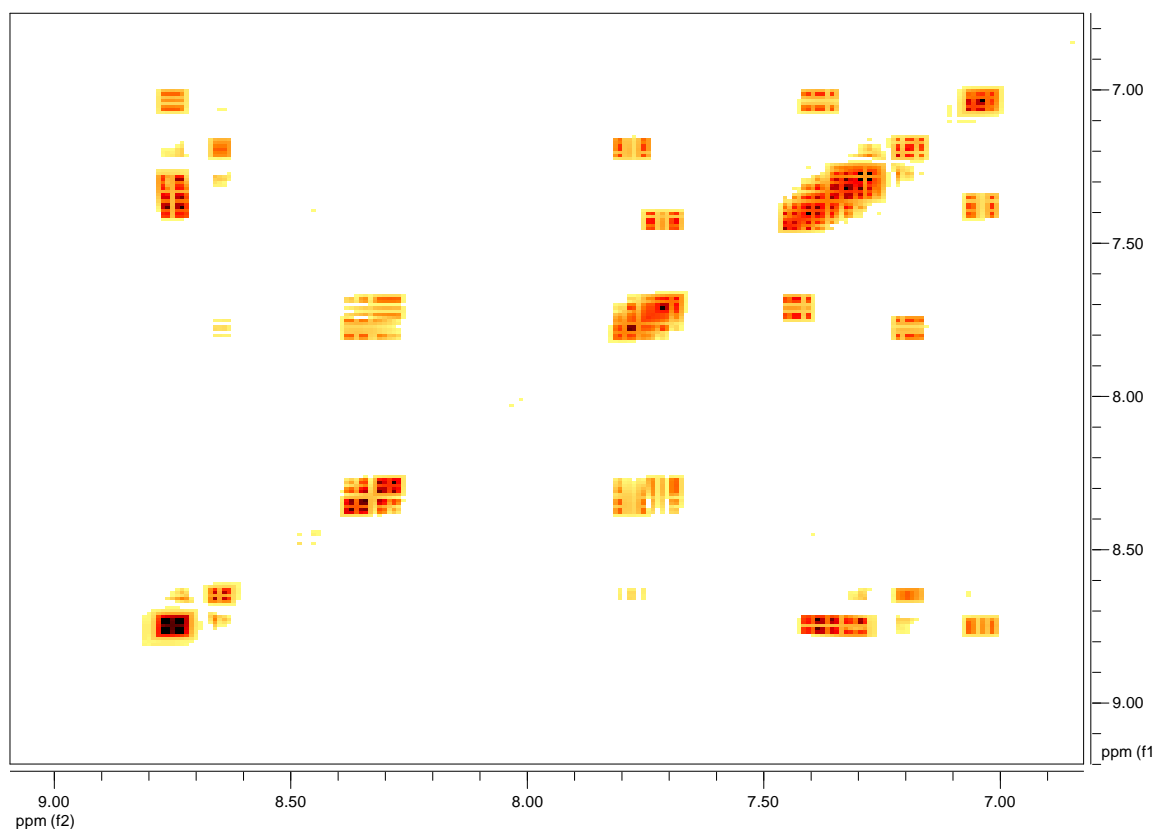



**$^{31}\text{P}$  NMR of 2c:**

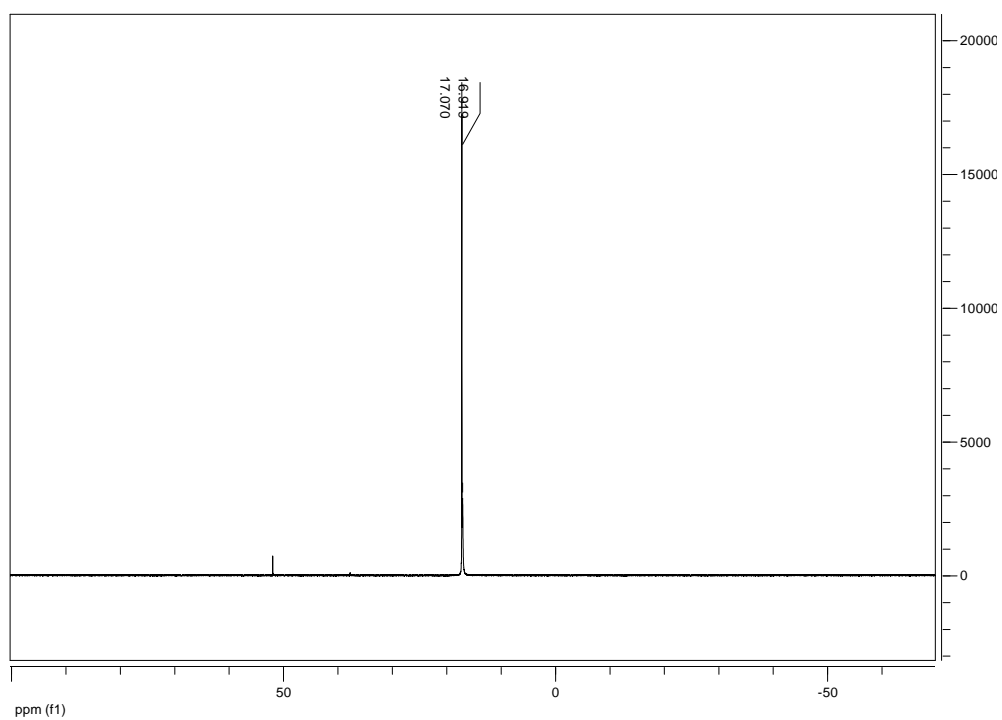

**$^{31}\text{P}$  NMR 3c:**

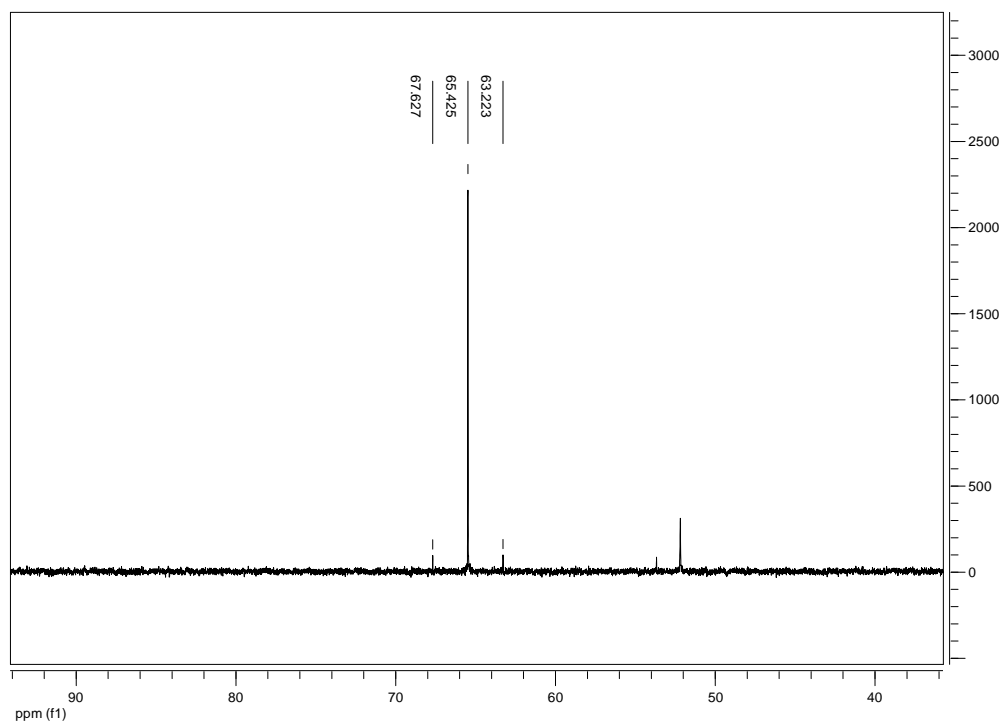

### $^1\text{H}$ NMR of 2d:

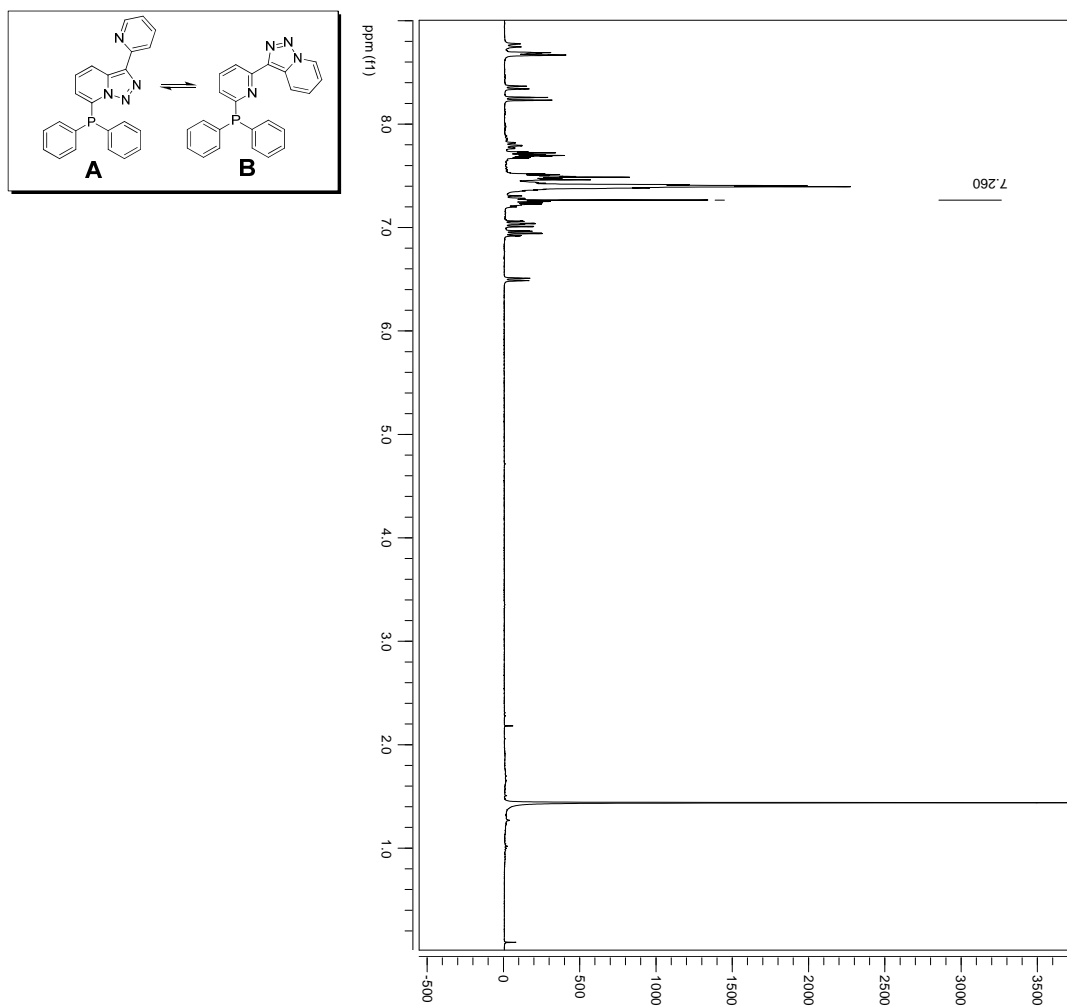

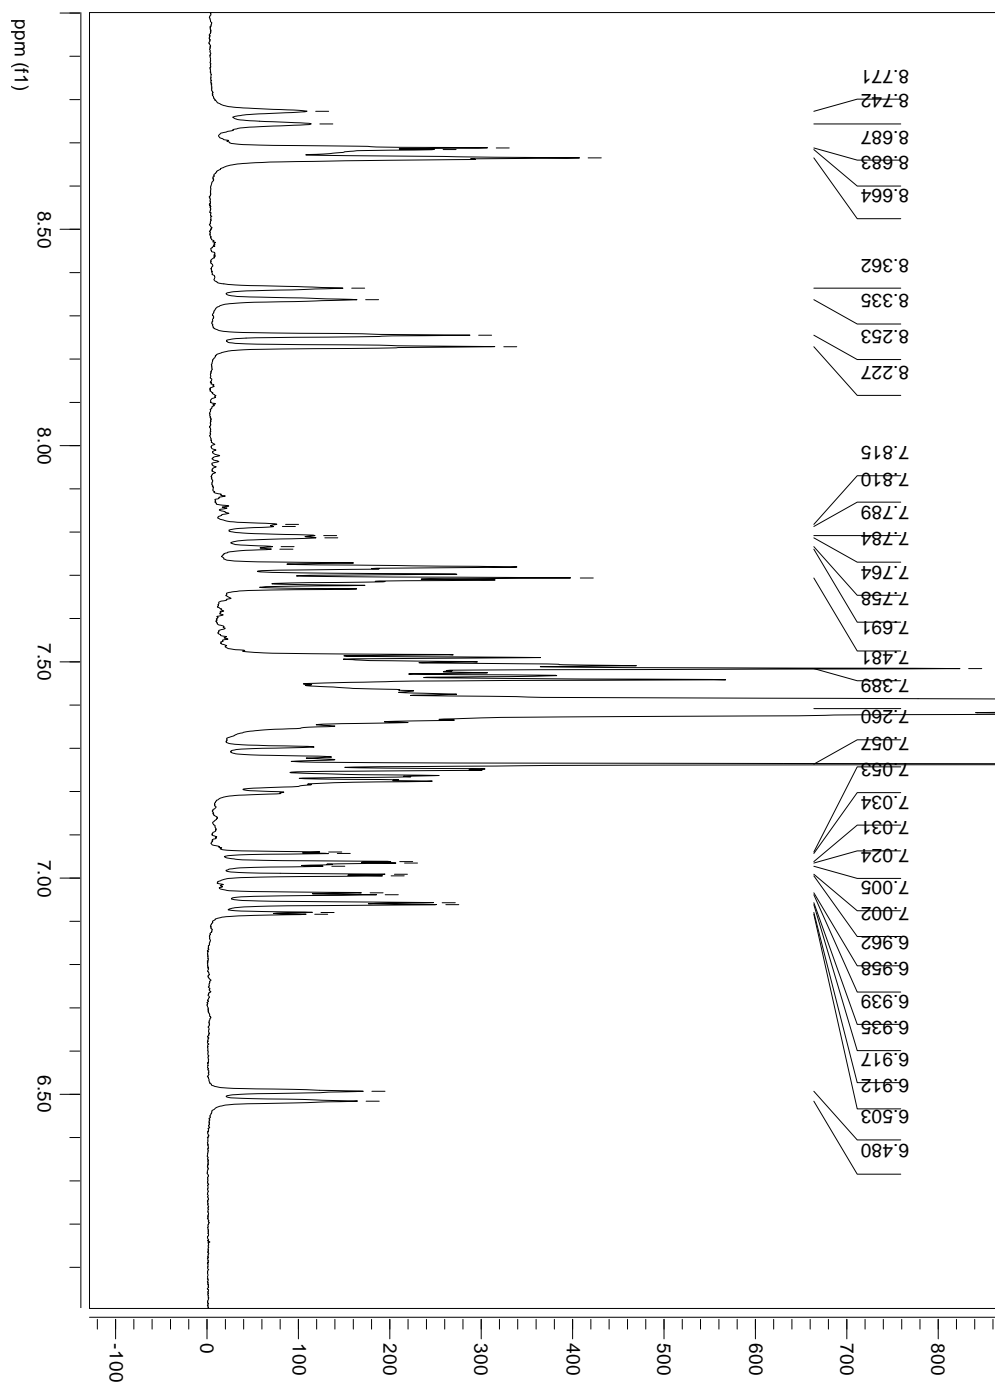

**$^{13}\text{C}$  NMR DEPT of 2c:**

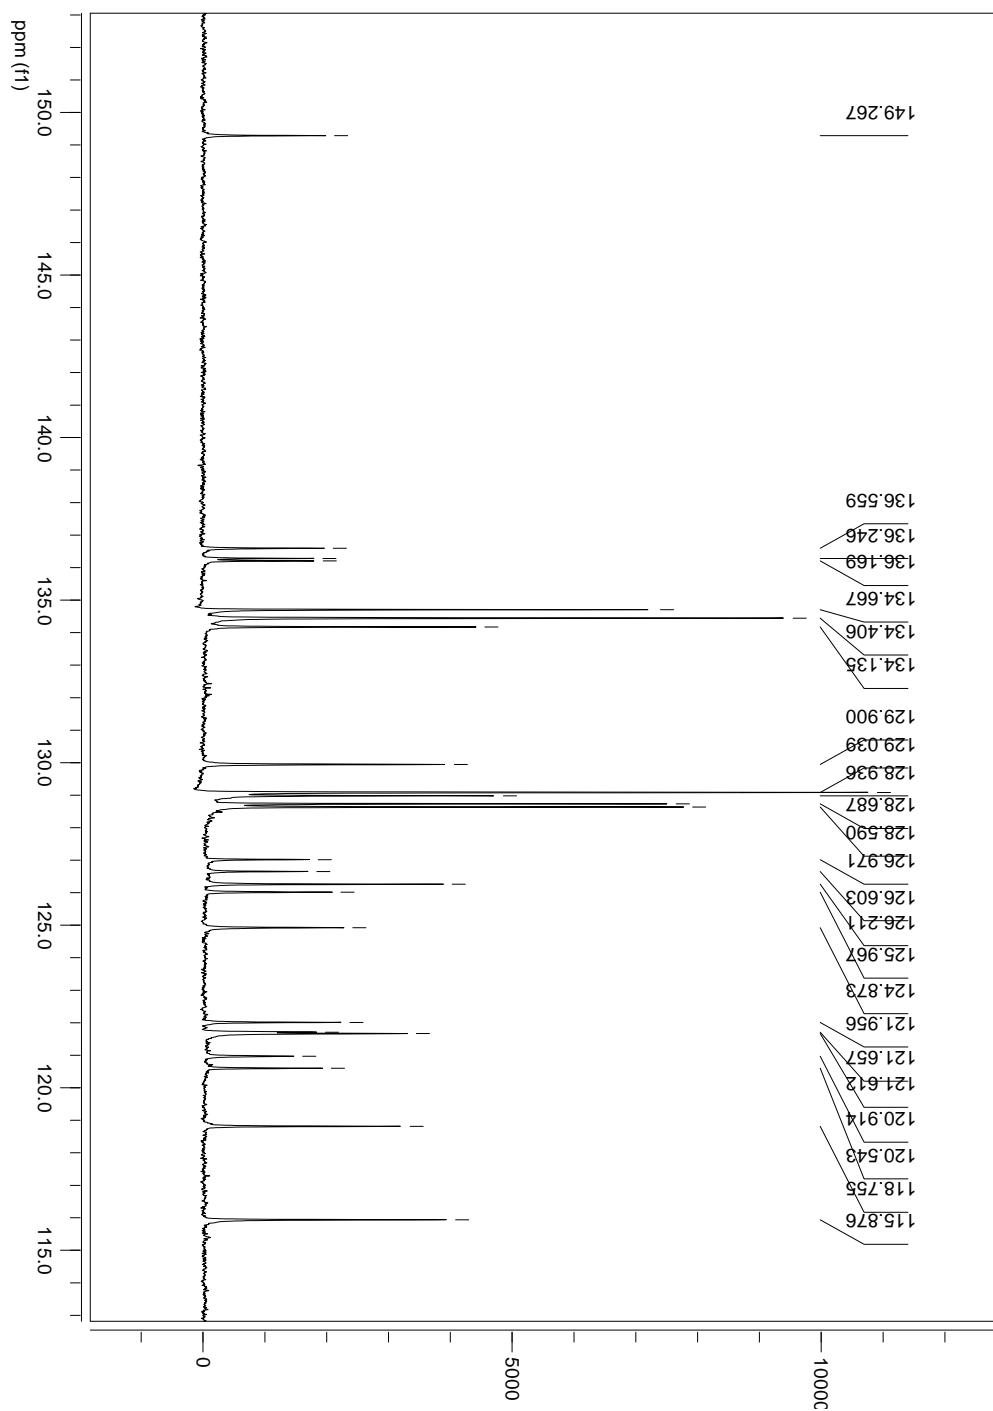

### $^{13}\text{C}$ NMR of 2c:

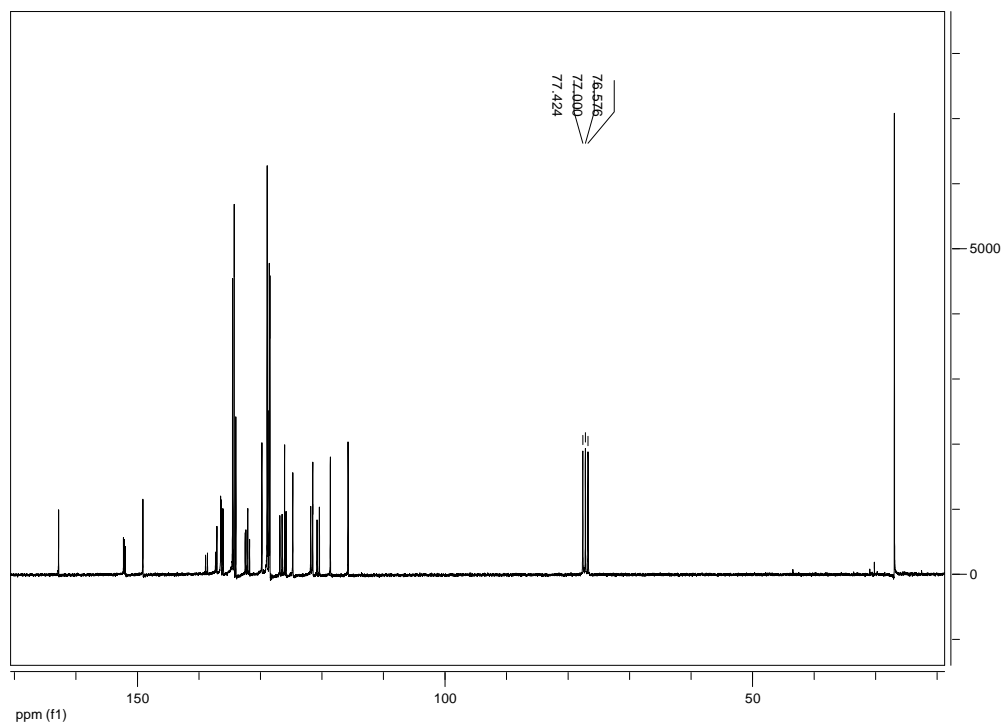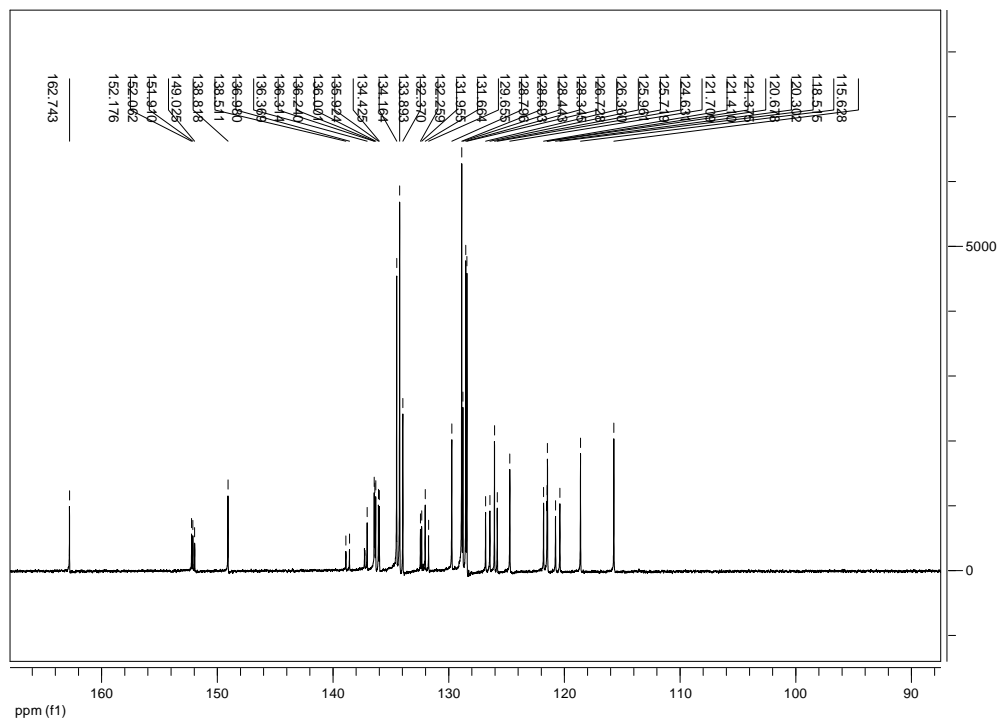

**COSY H-H of 2c:**

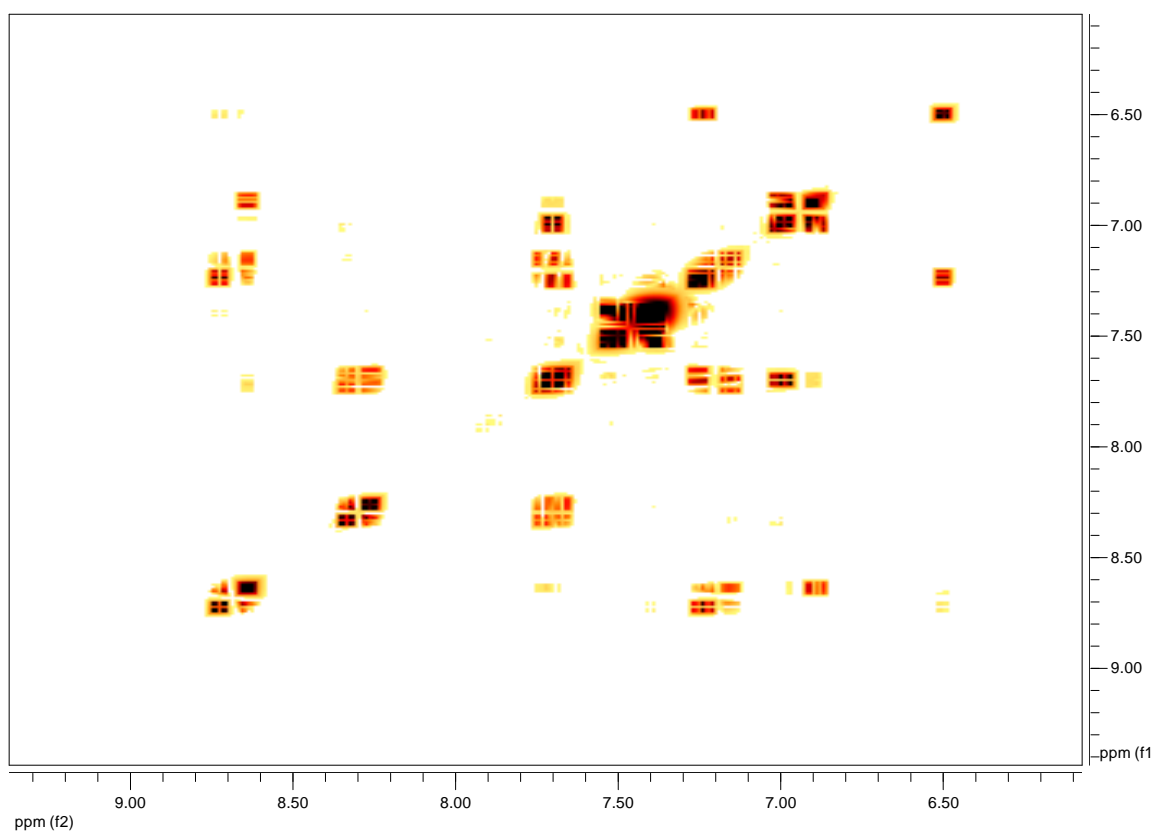

**$^{31}\text{P}$  NMR of 2c:**

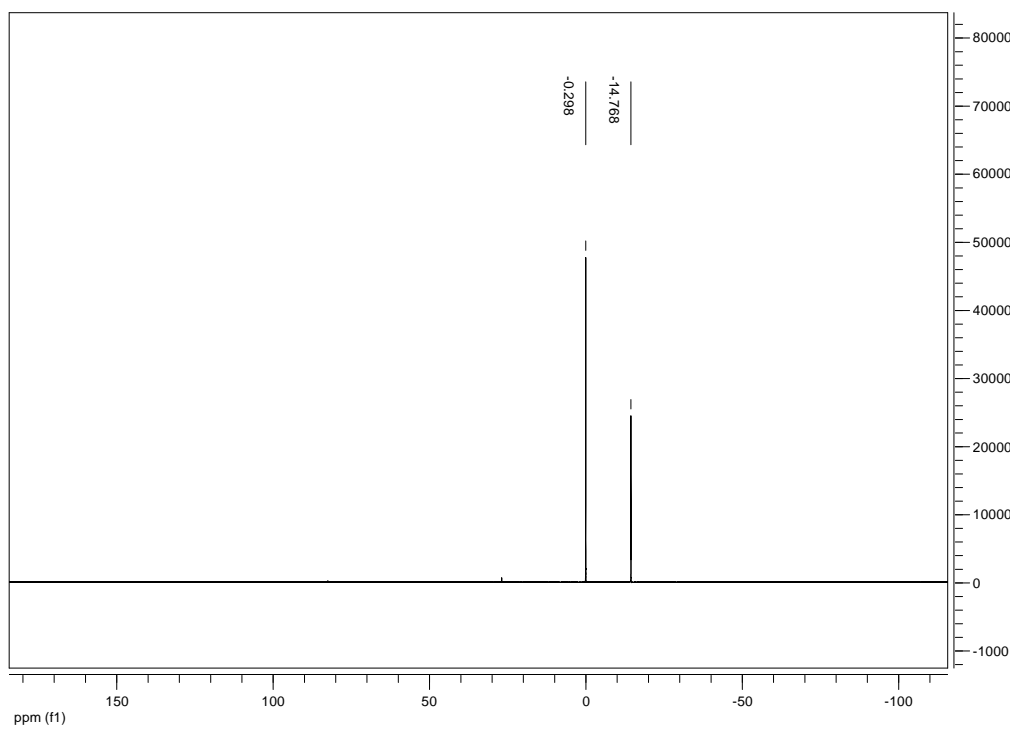

**$^{31}\text{P}$  NMR of 3c:**

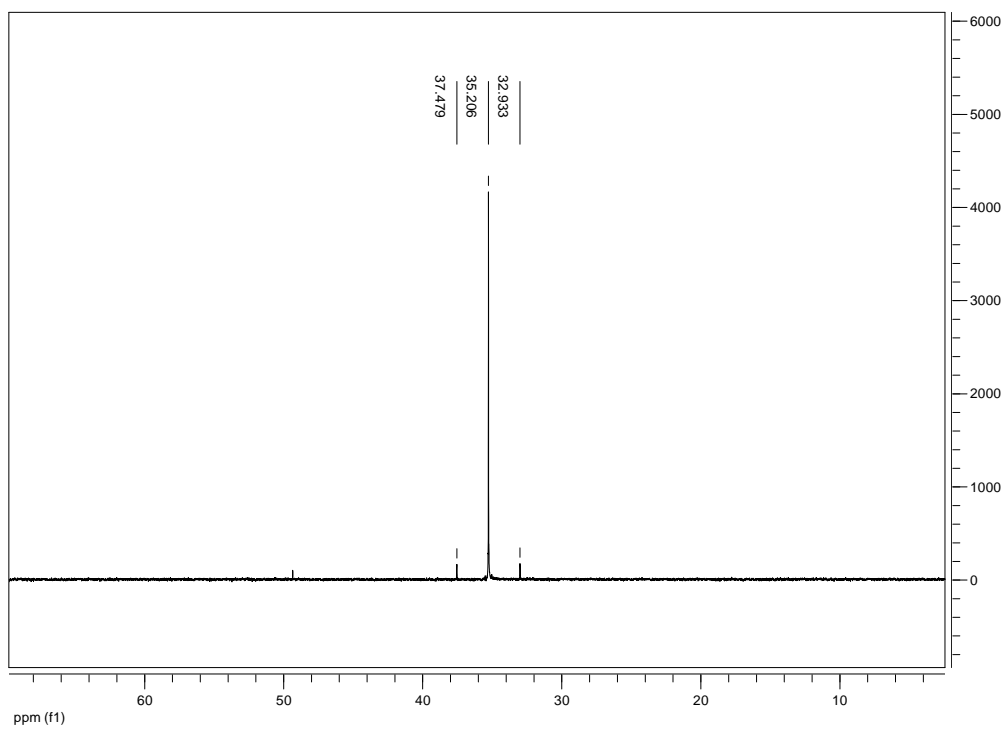

### $^1\text{H}$ NMR of 2e:

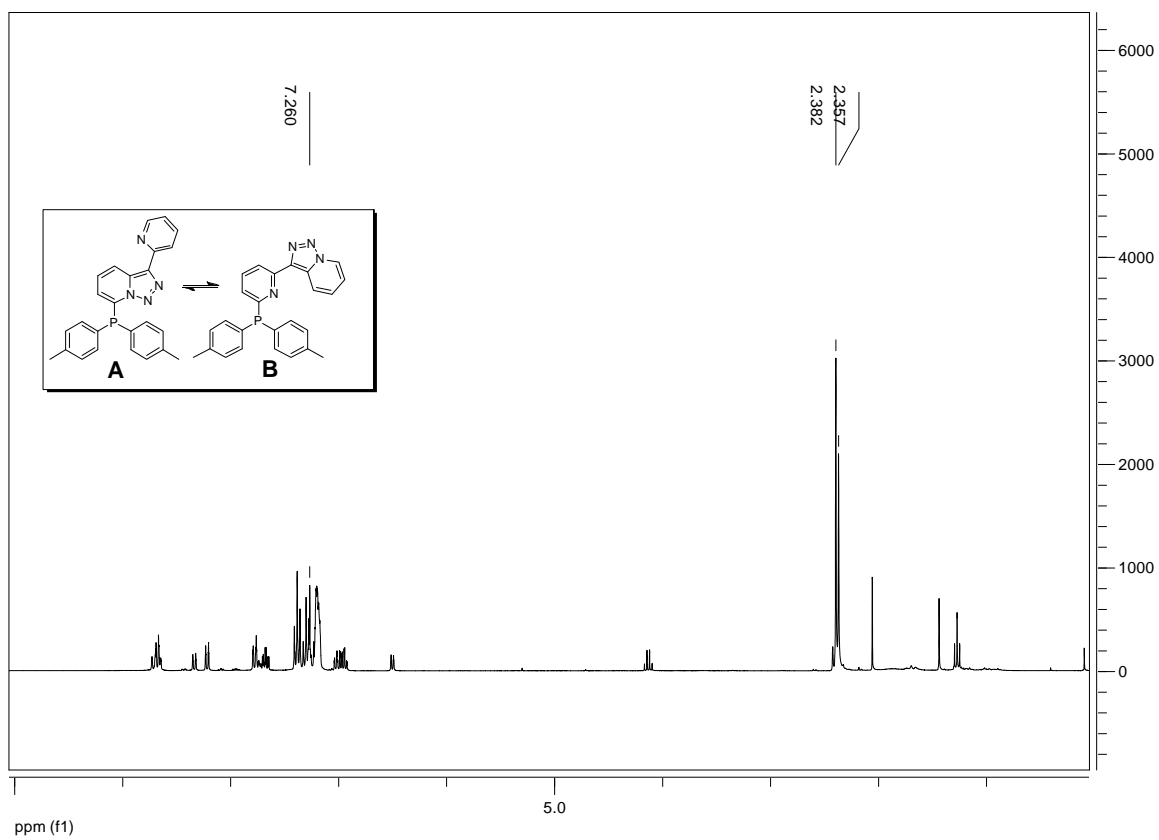



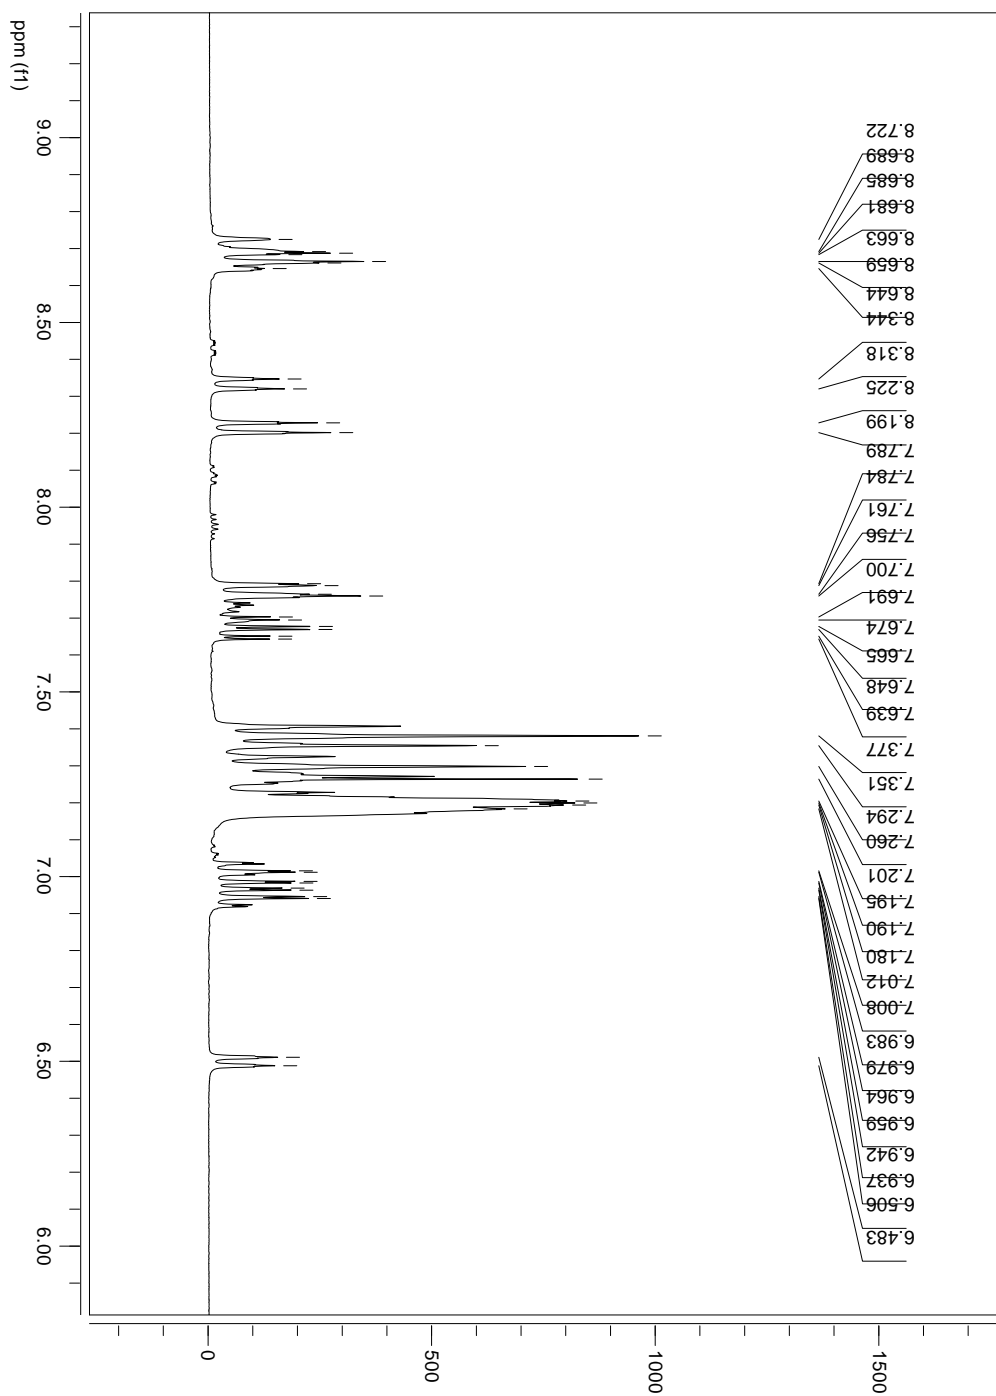

### $^{13}\text{C}$ NMR DEPT of 2e:

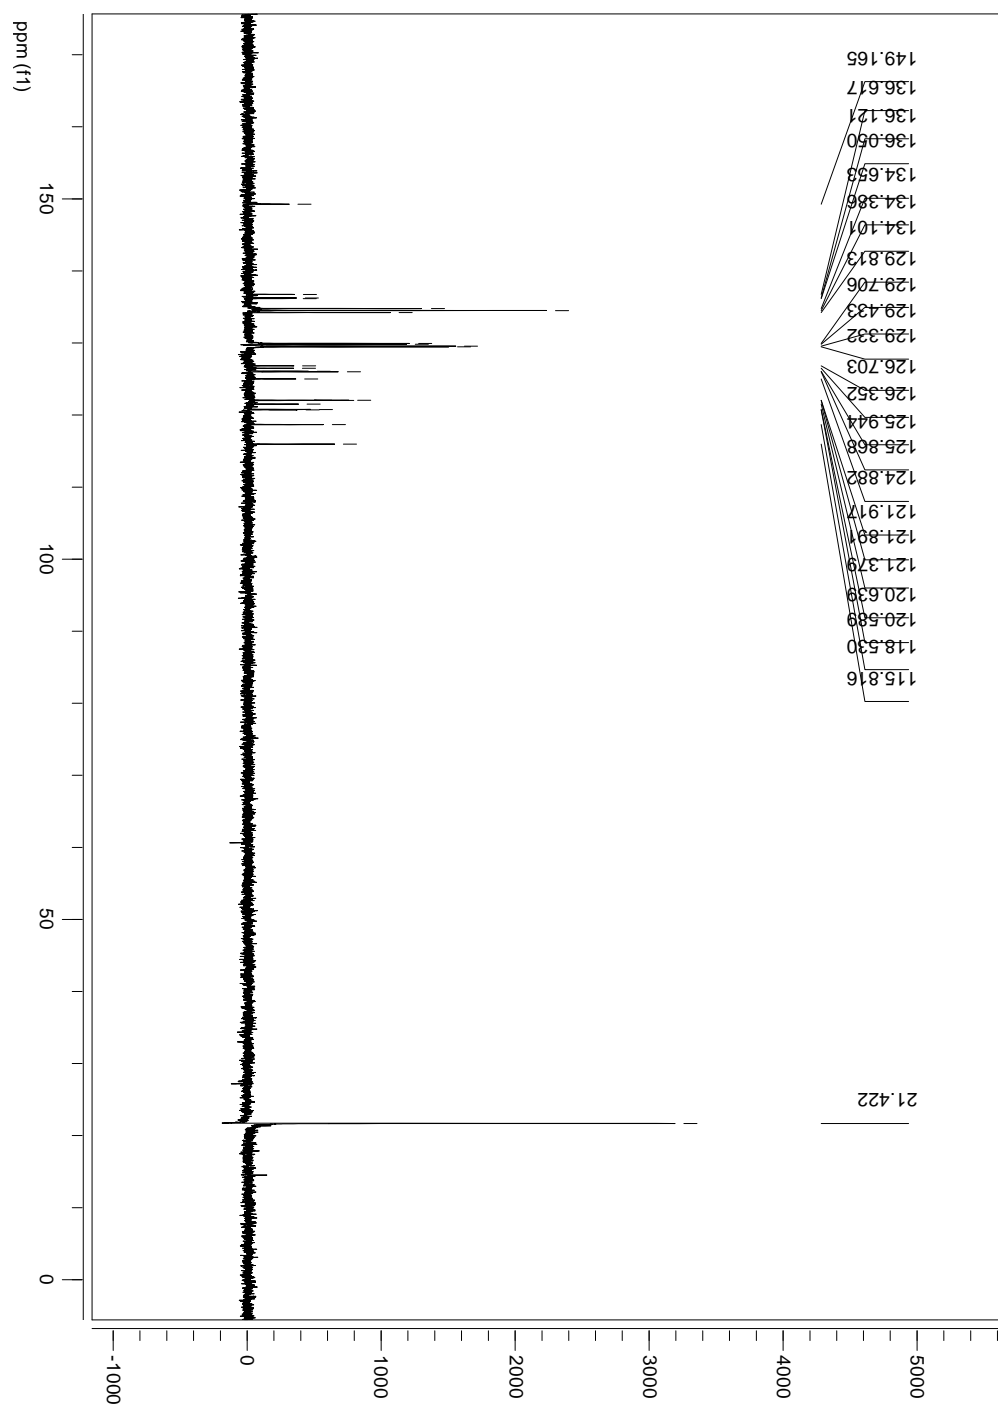

**$^{13}\text{C}$  NMR of 2e:**

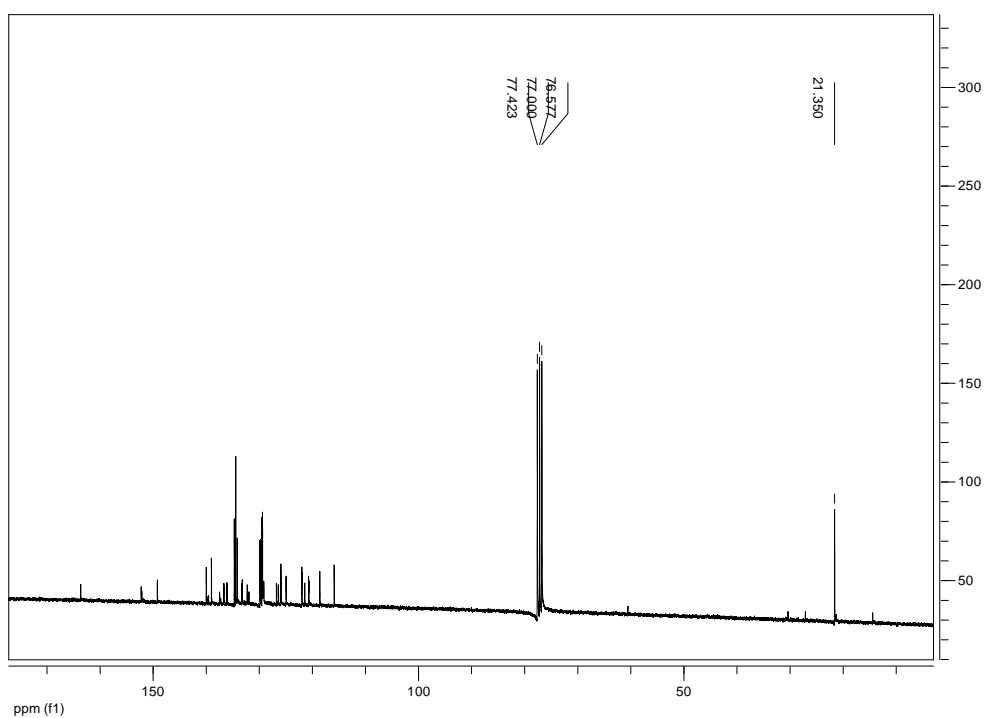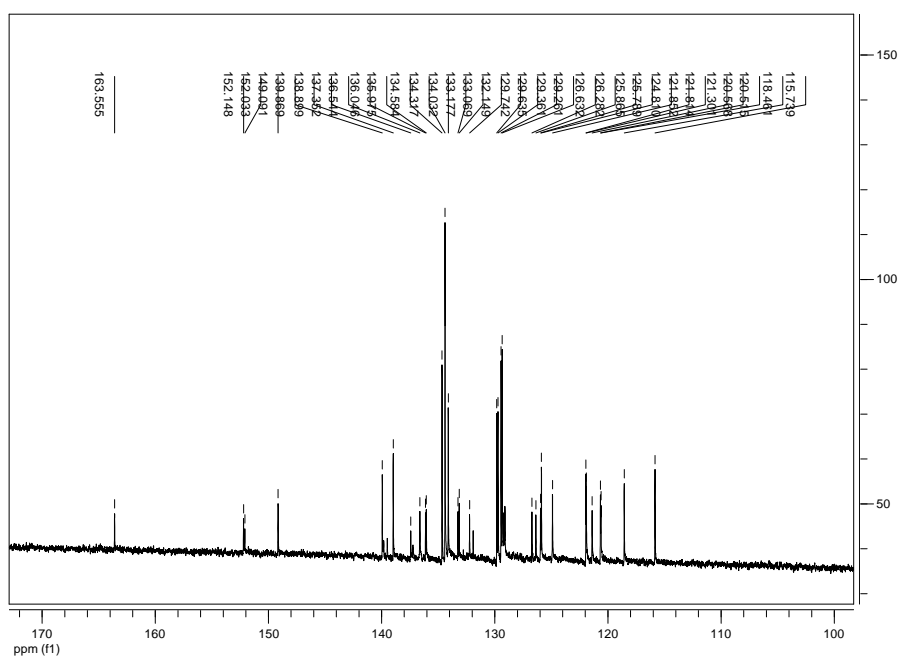

### COSY H-H of 2e:

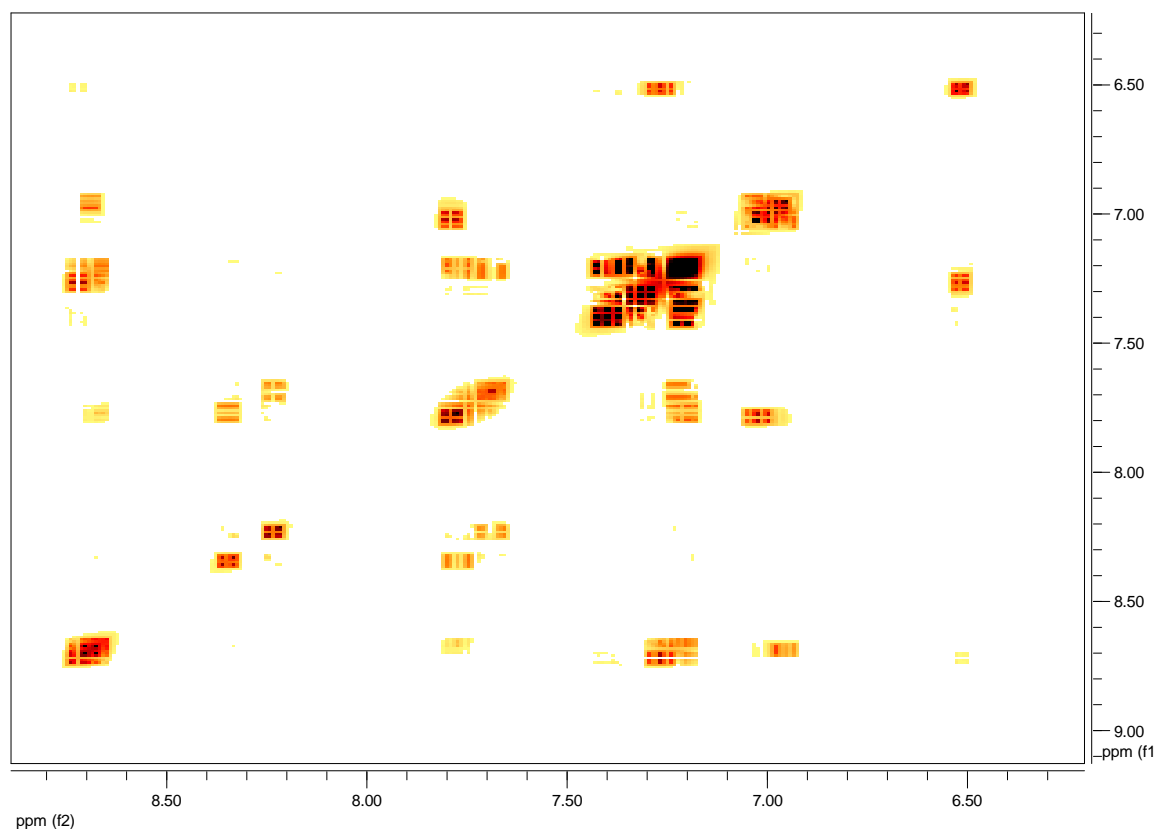

**$^{31}\text{P}$  NMR of 2e:**

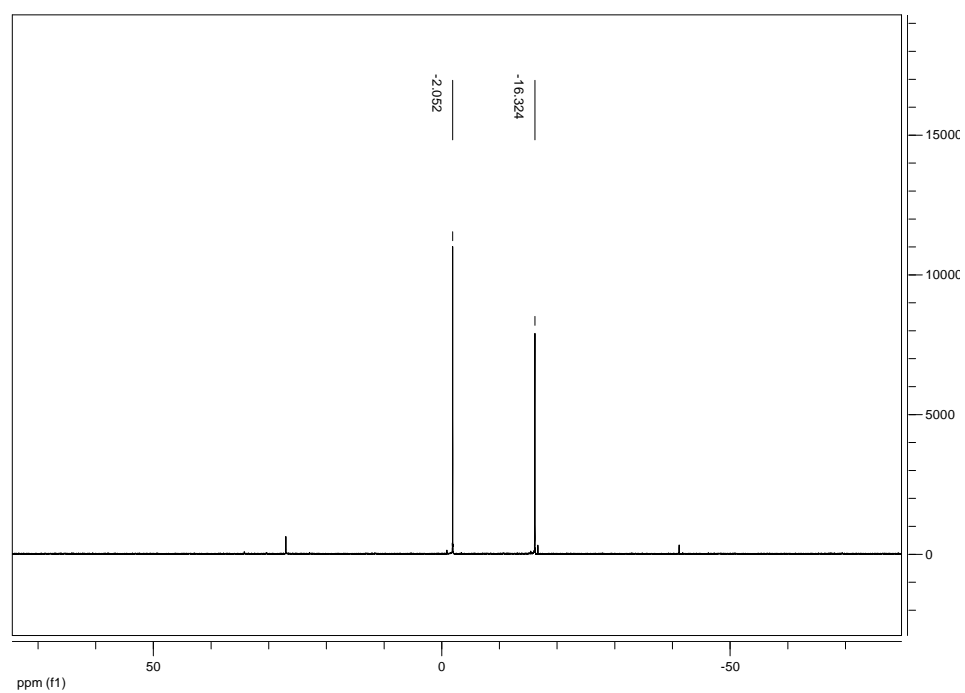

**$^{31}\text{P}$  NMR of 3e:**

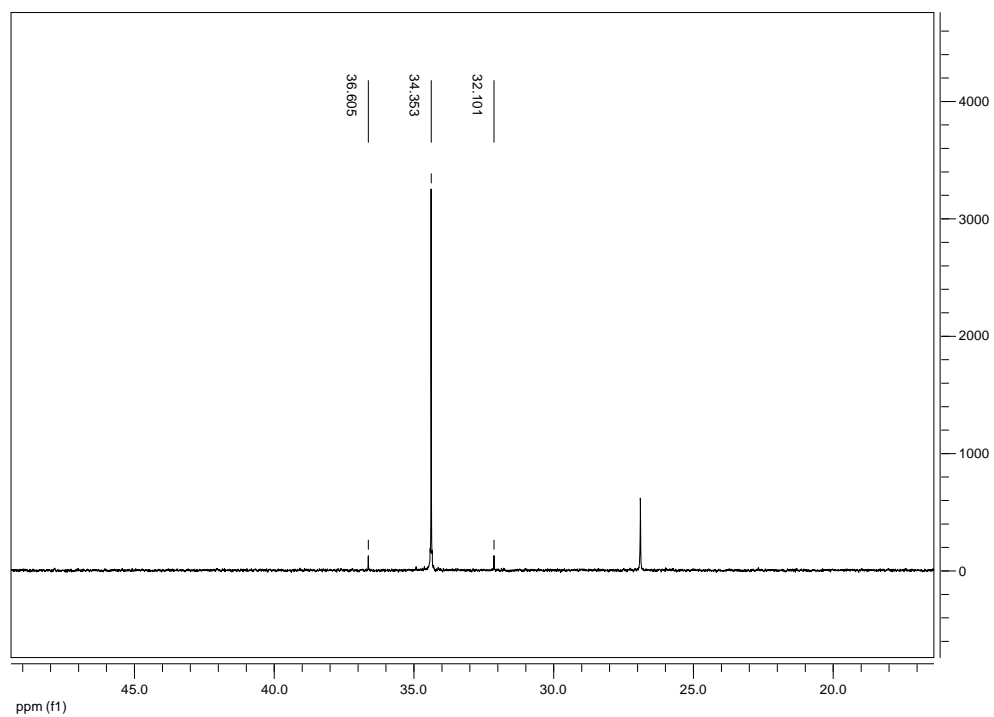

**<sup>1</sup>H NMR of 2f:**

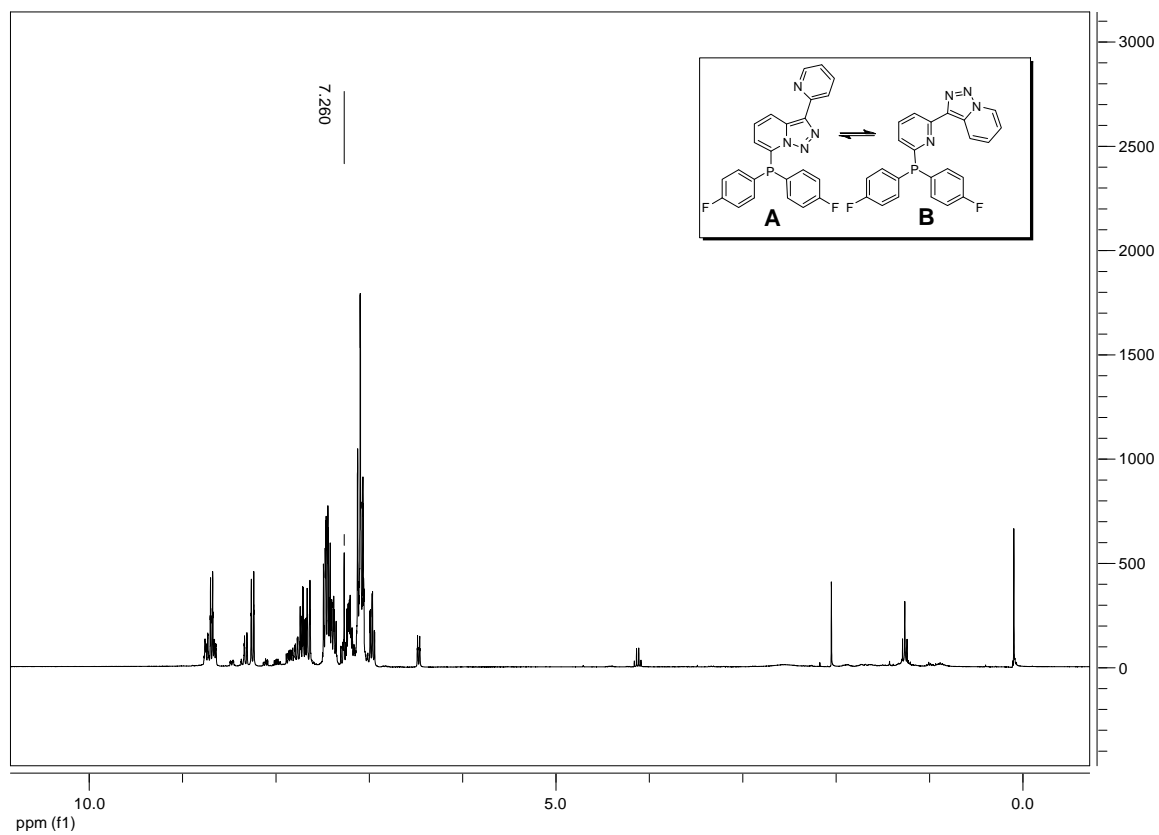

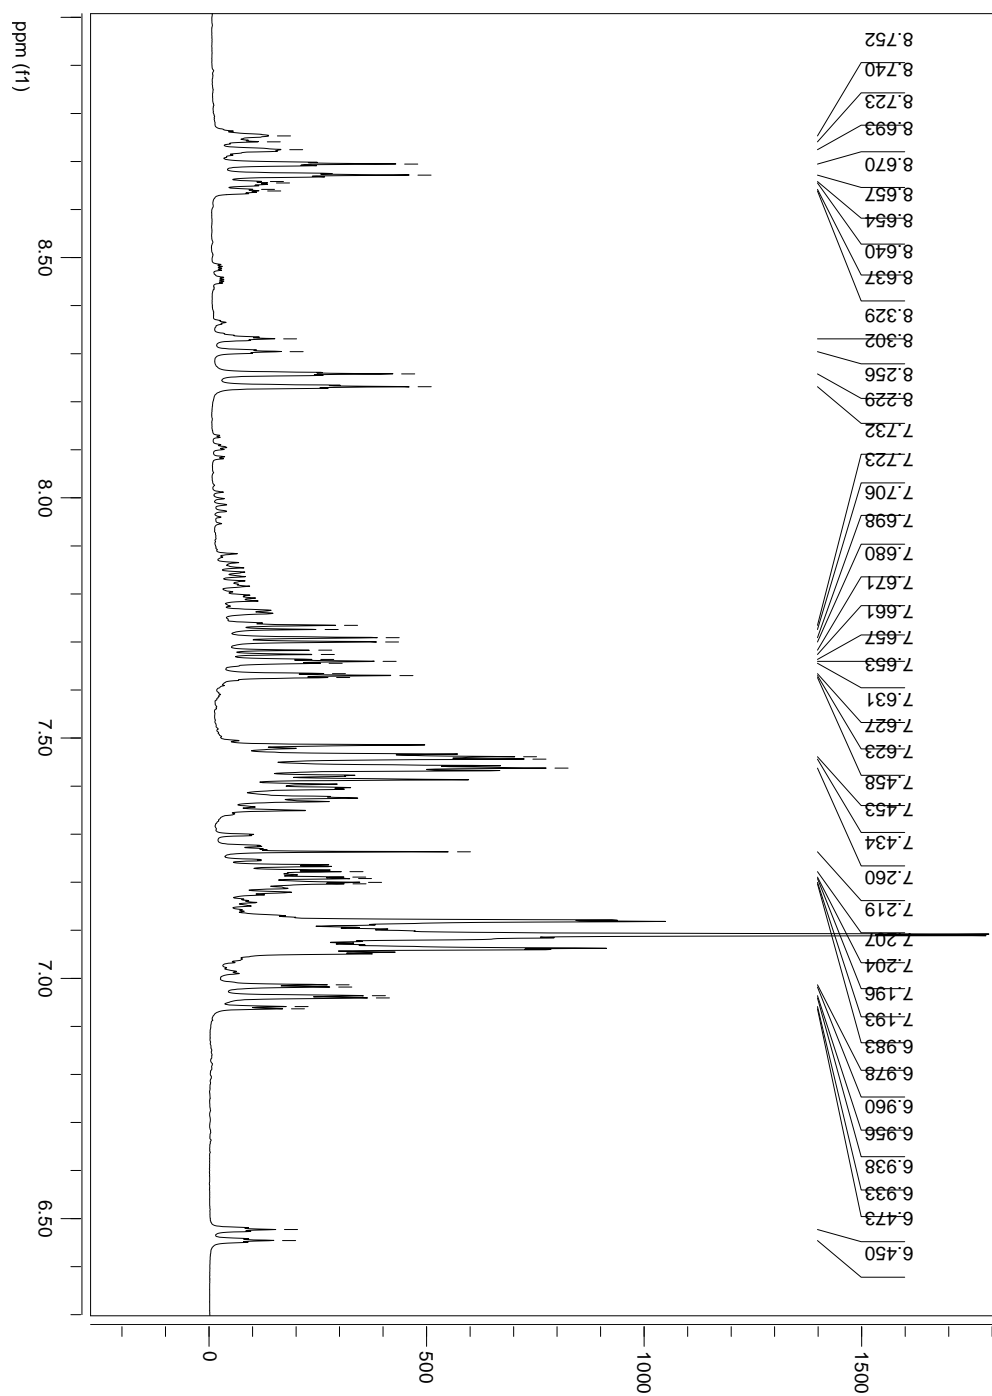

**$^{13}\text{C}$  NMR DEPT of 2f:**

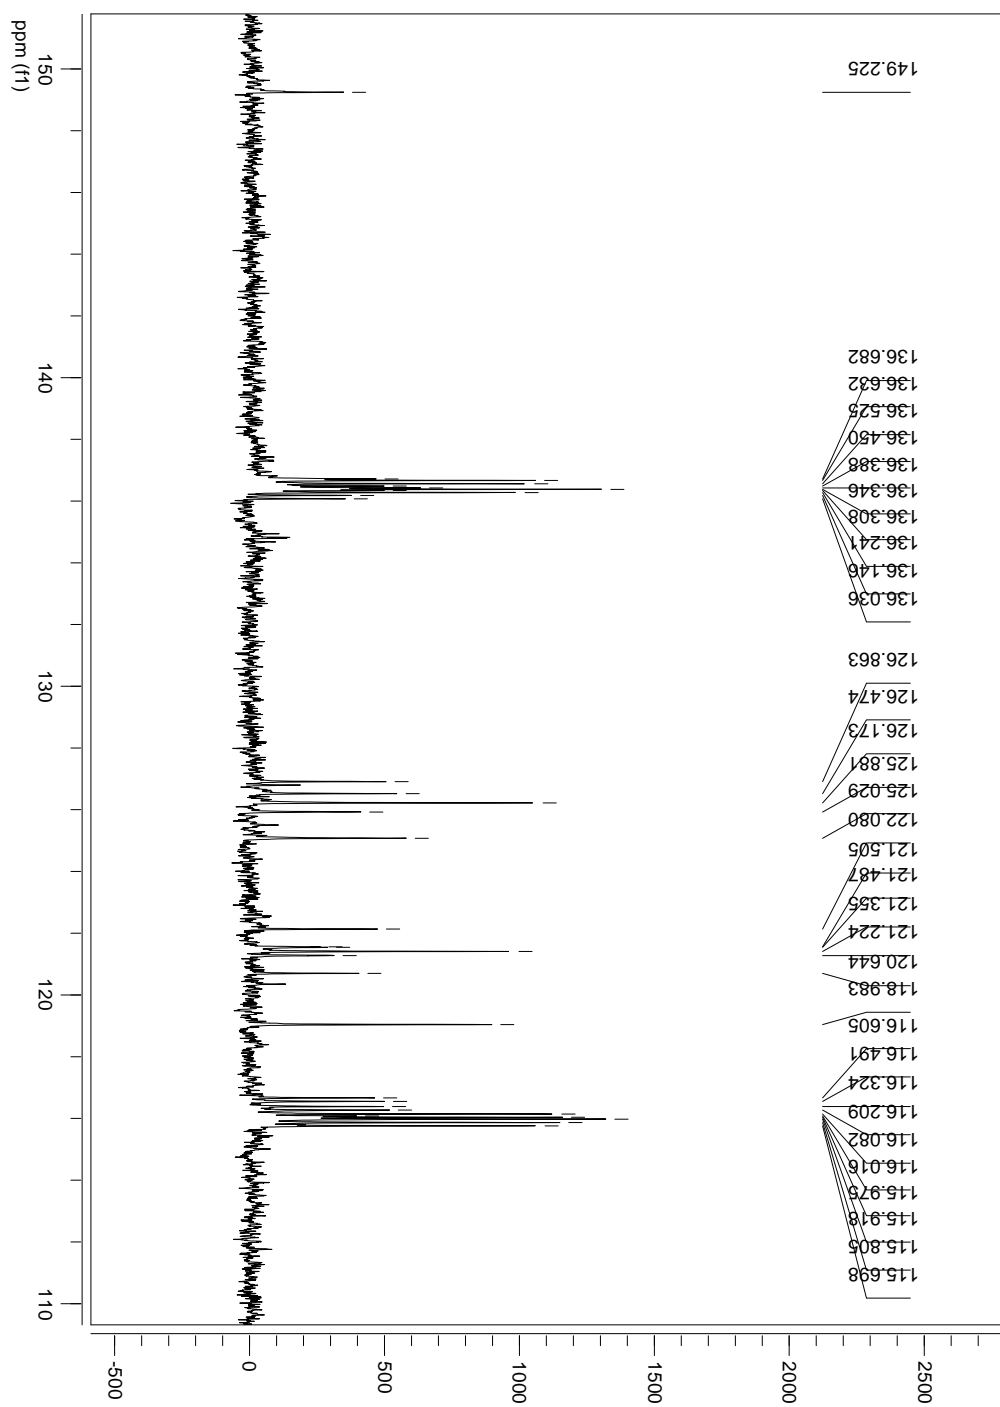



**$^{13}\text{C}$  NMR of 2f:**

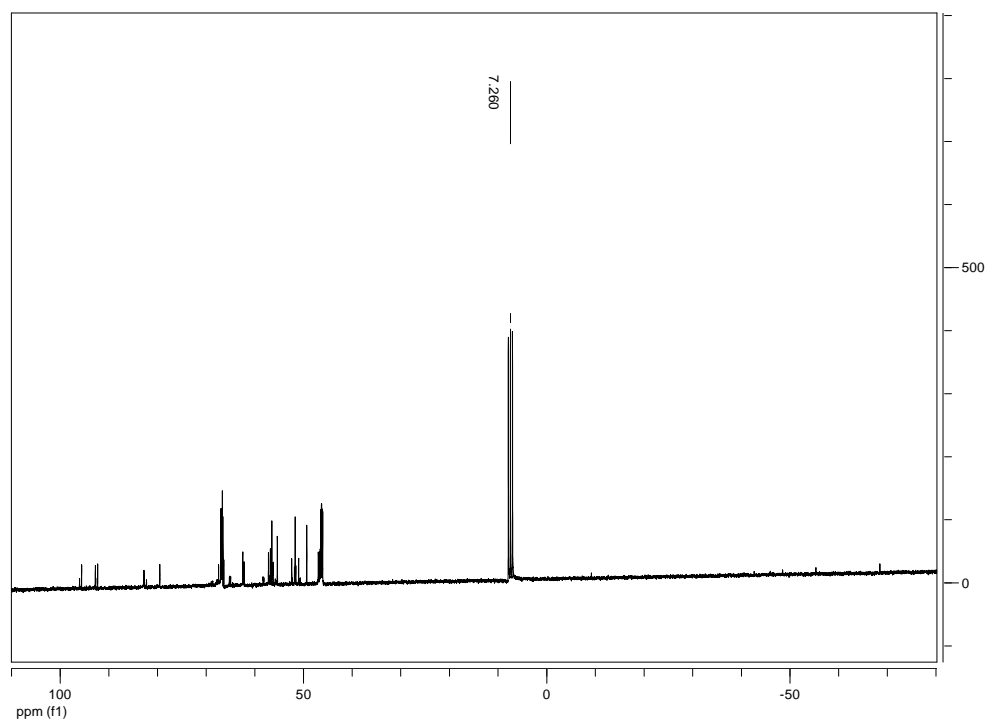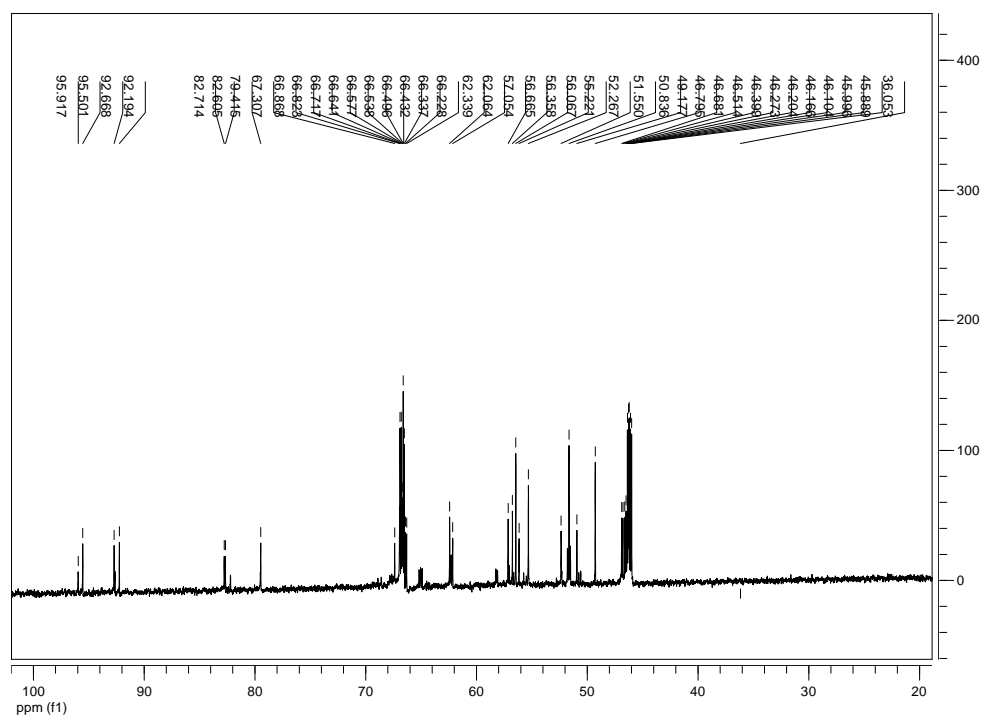

**$^{31}\text{P}$  NMR of 2f:**

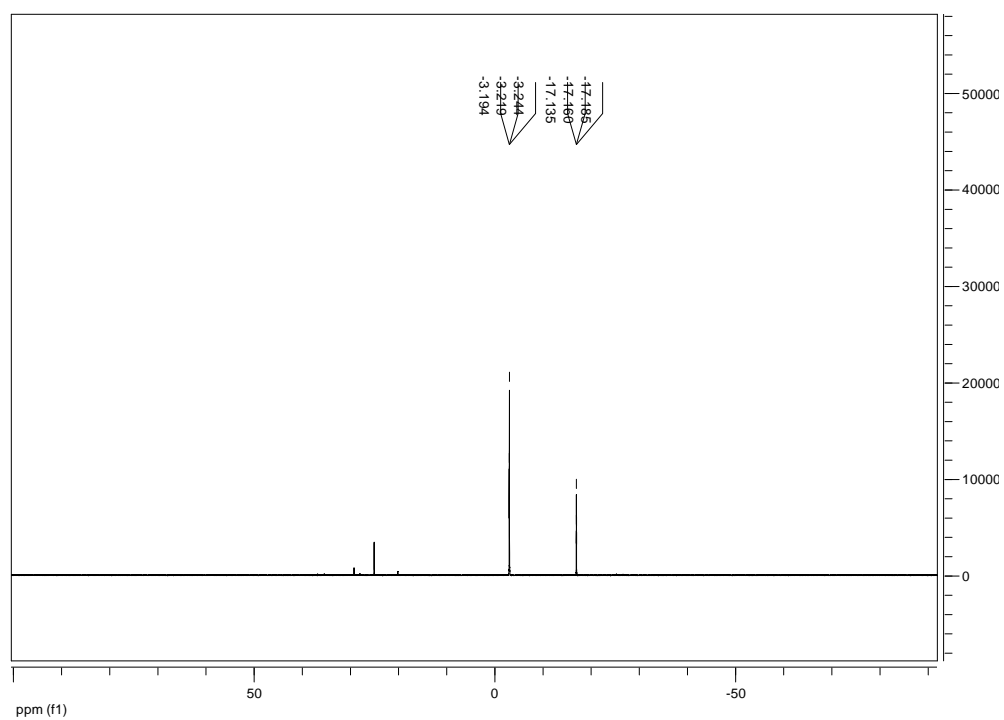

**$^{31}\text{P}$  NMR of 3f:**

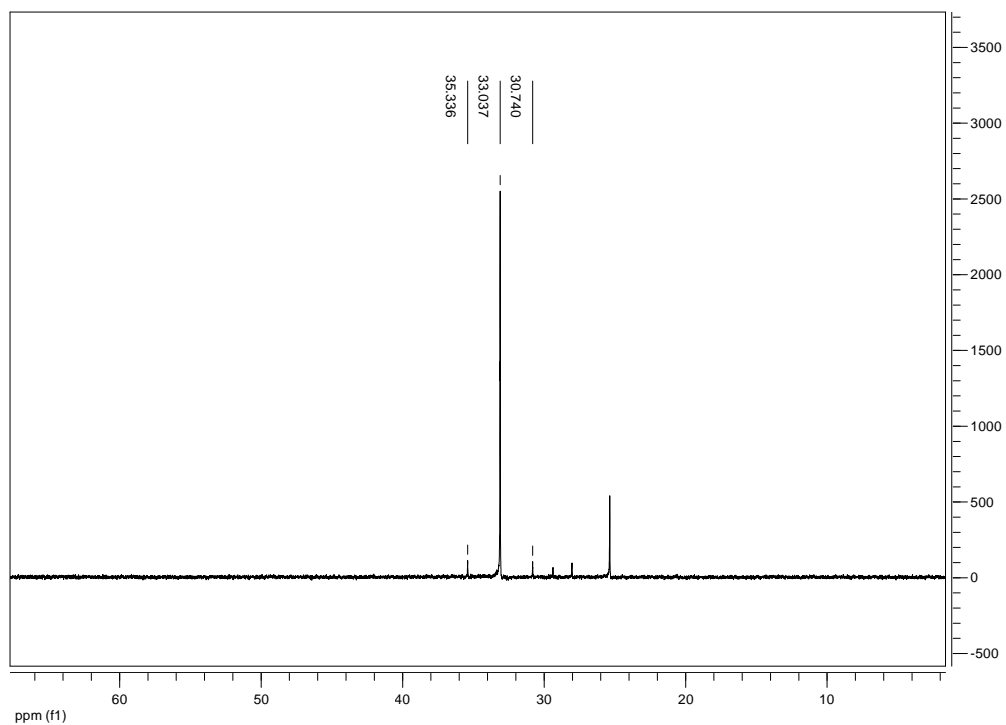

**<sup>1</sup>H NMR of 2g:**

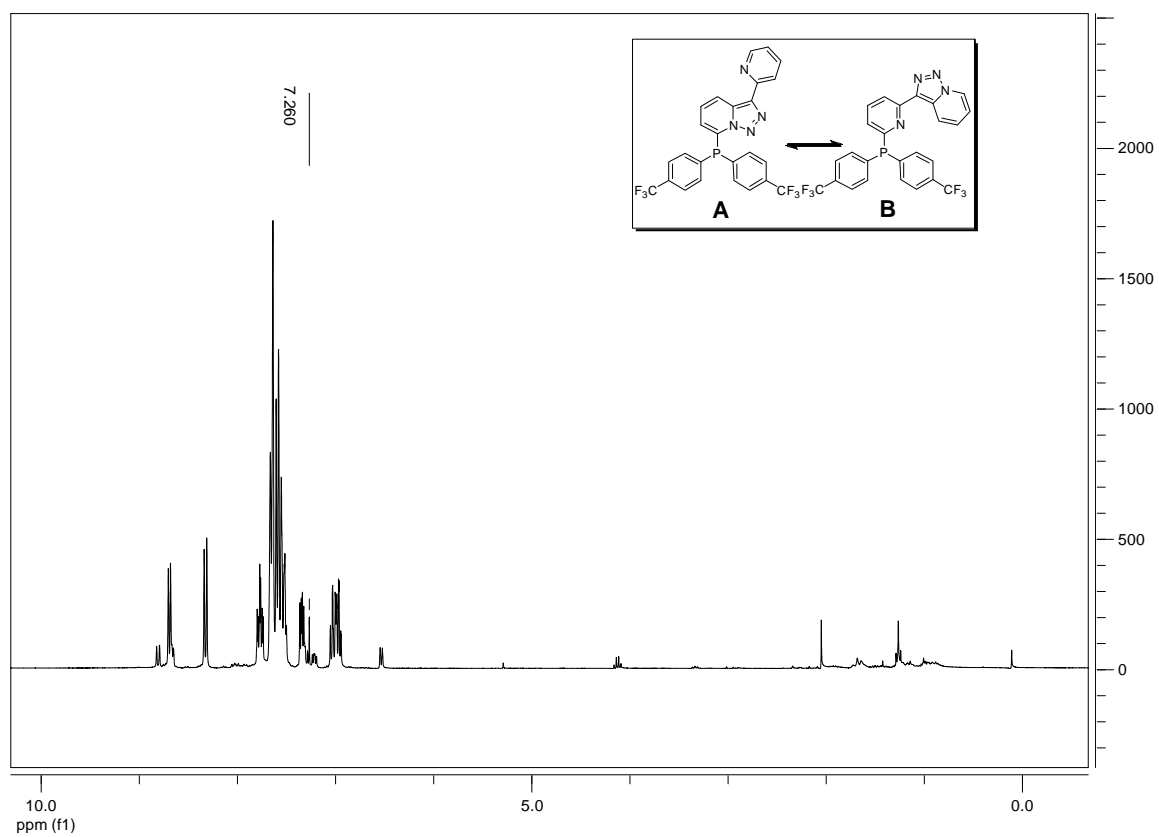

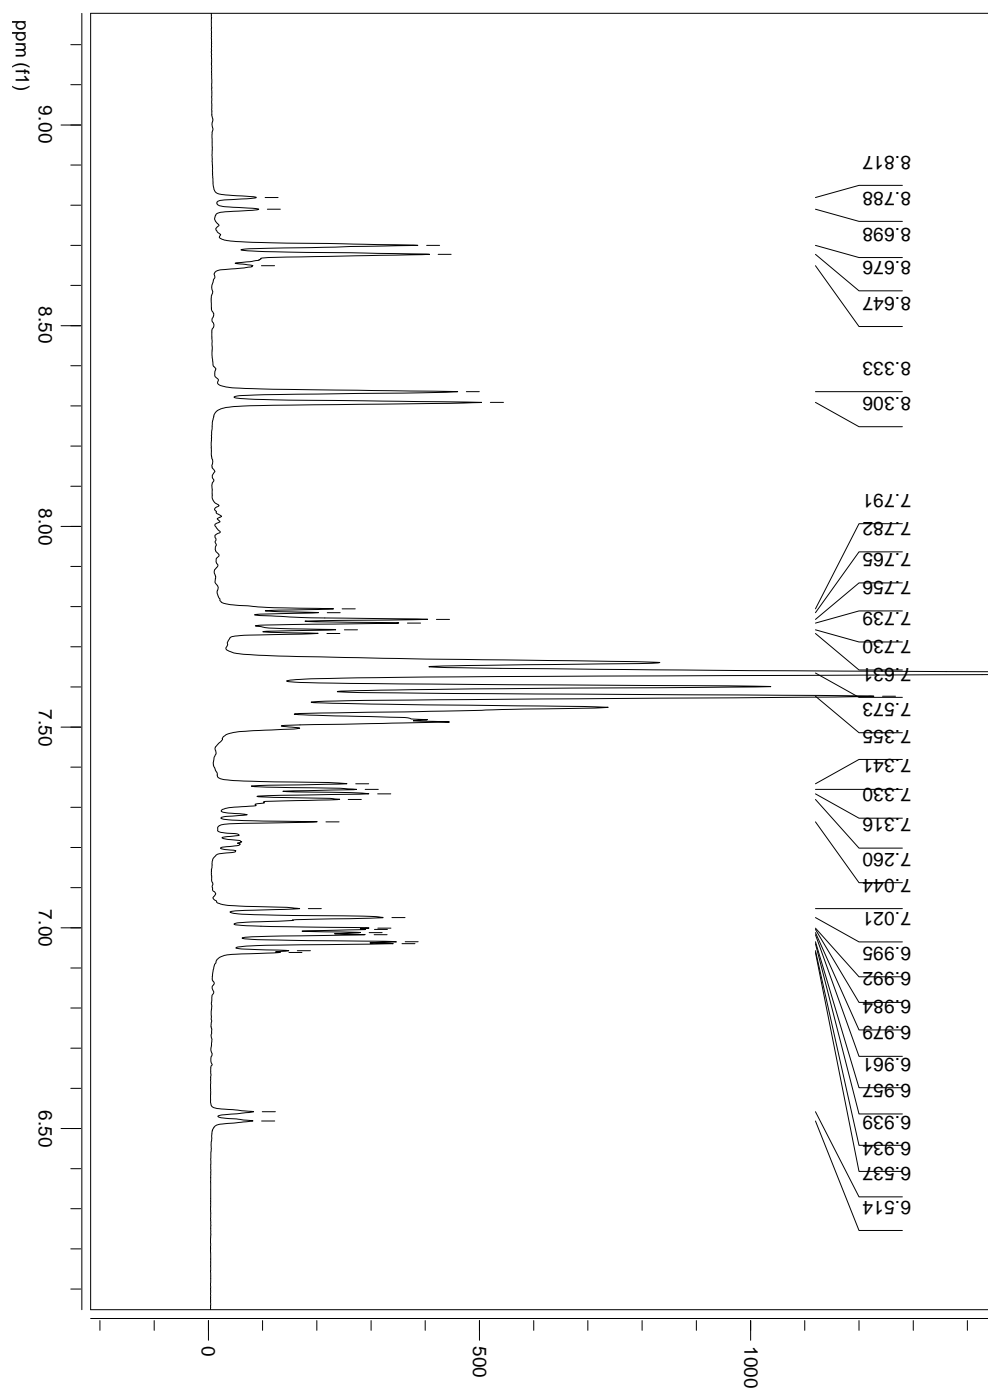

**$^{13}\text{C}$  NMR DEPT of 2g:**

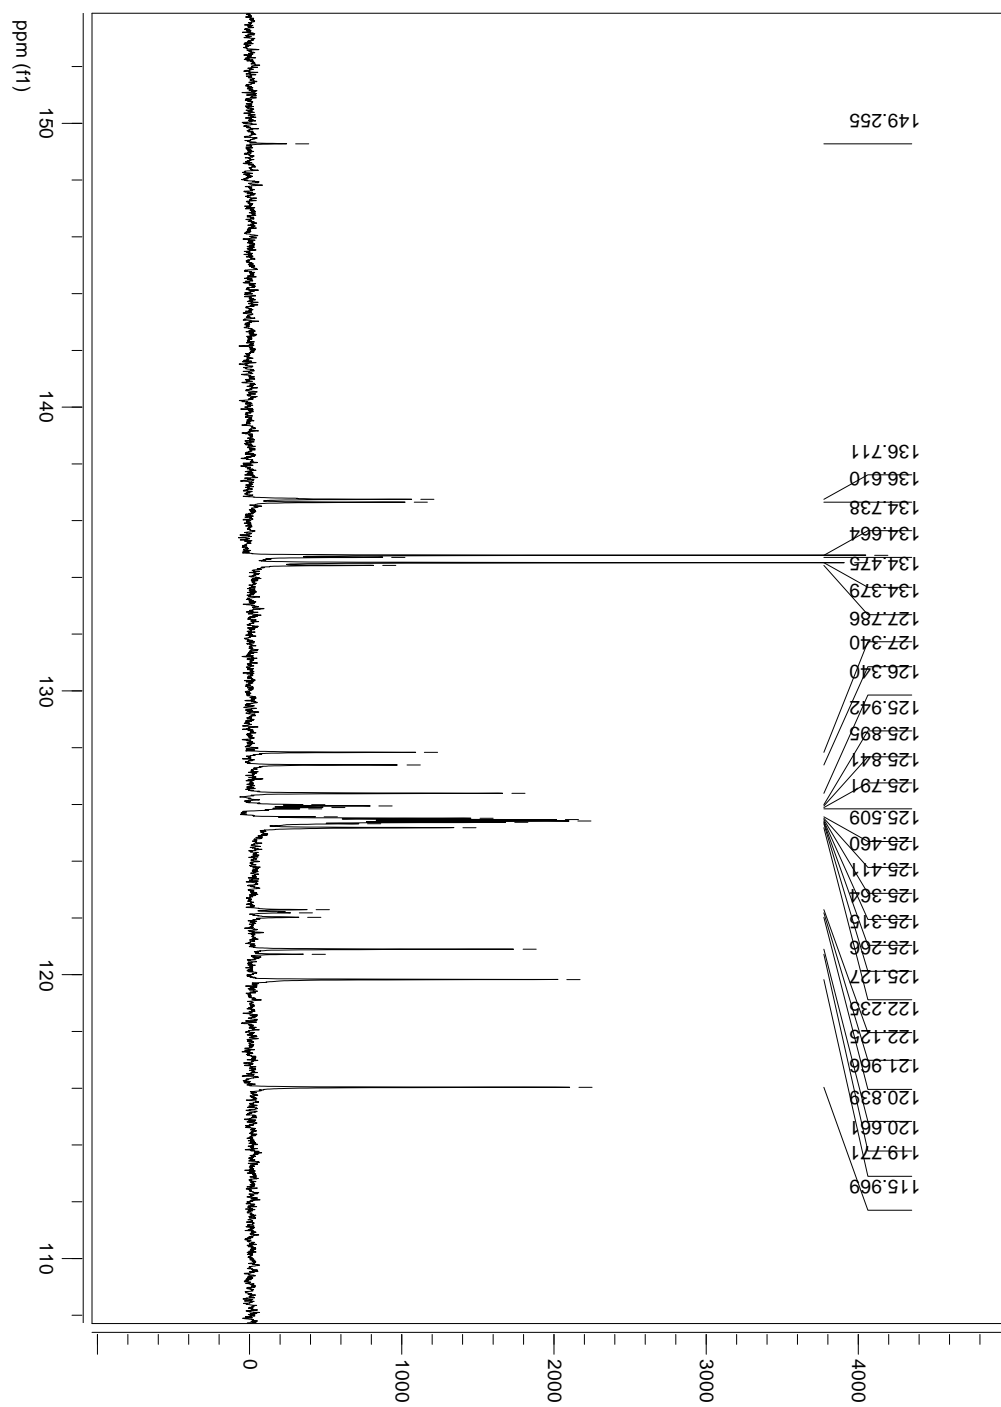



**COSY H-H of 2g:**

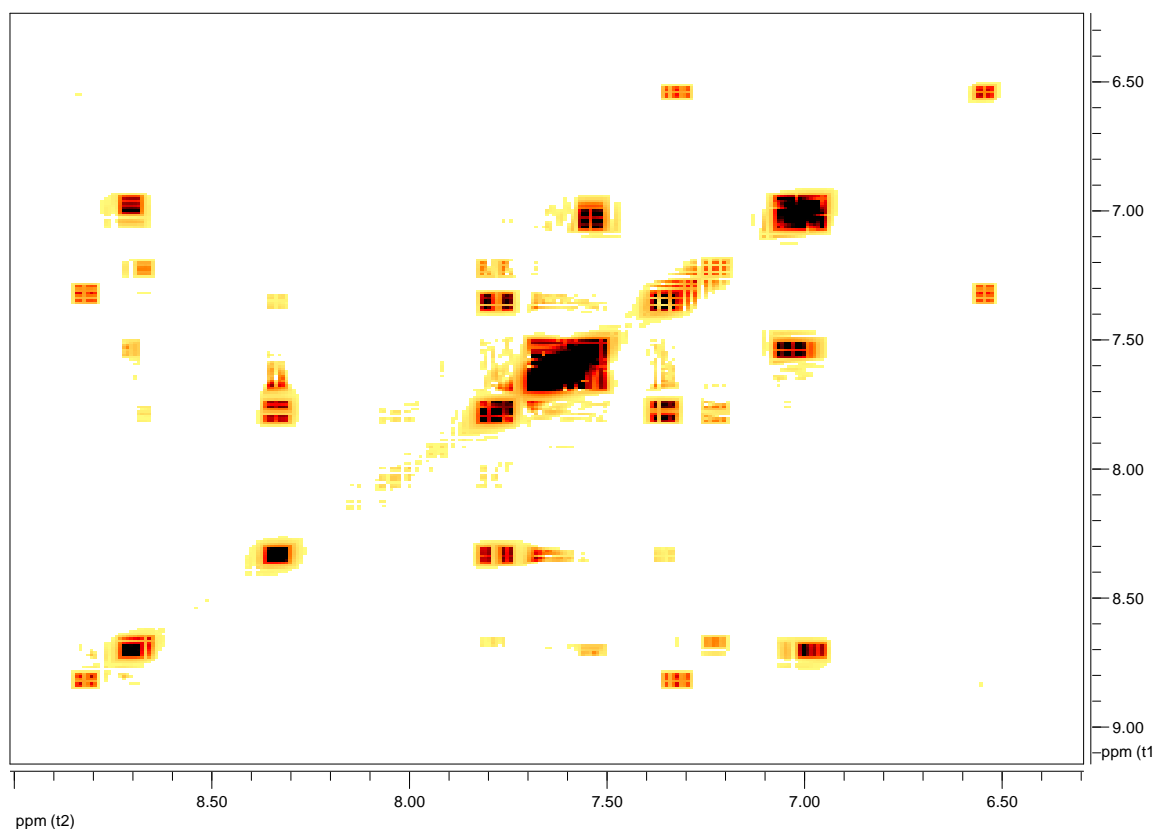

**$^{31}\text{P}$  NMR of 2g:**

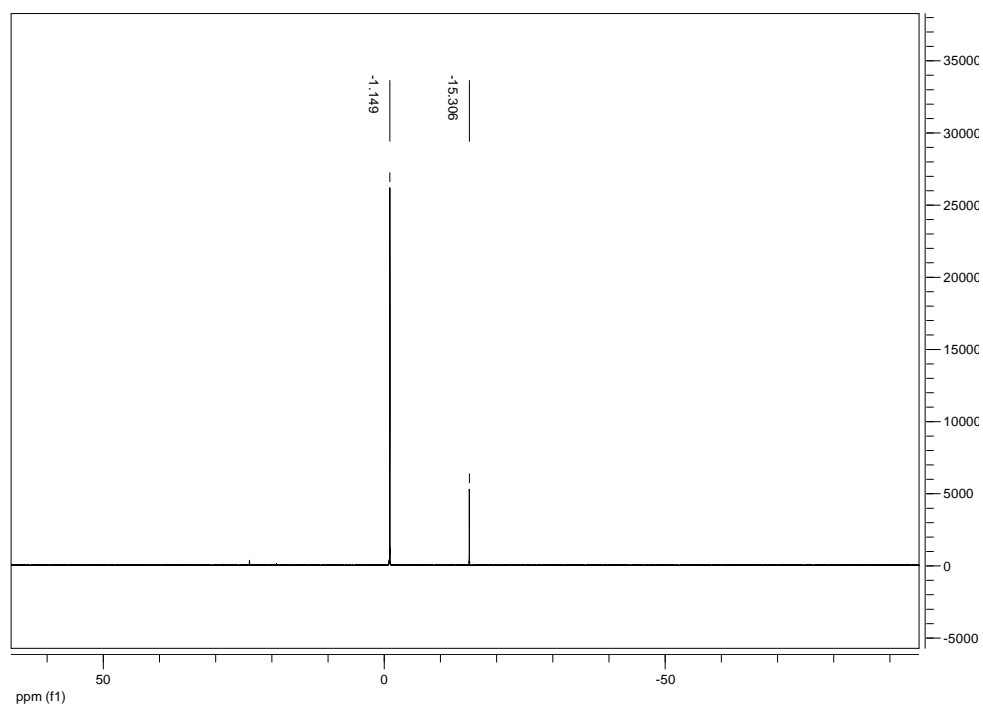

**$^{31}\text{P}$  NMR of 3g:**

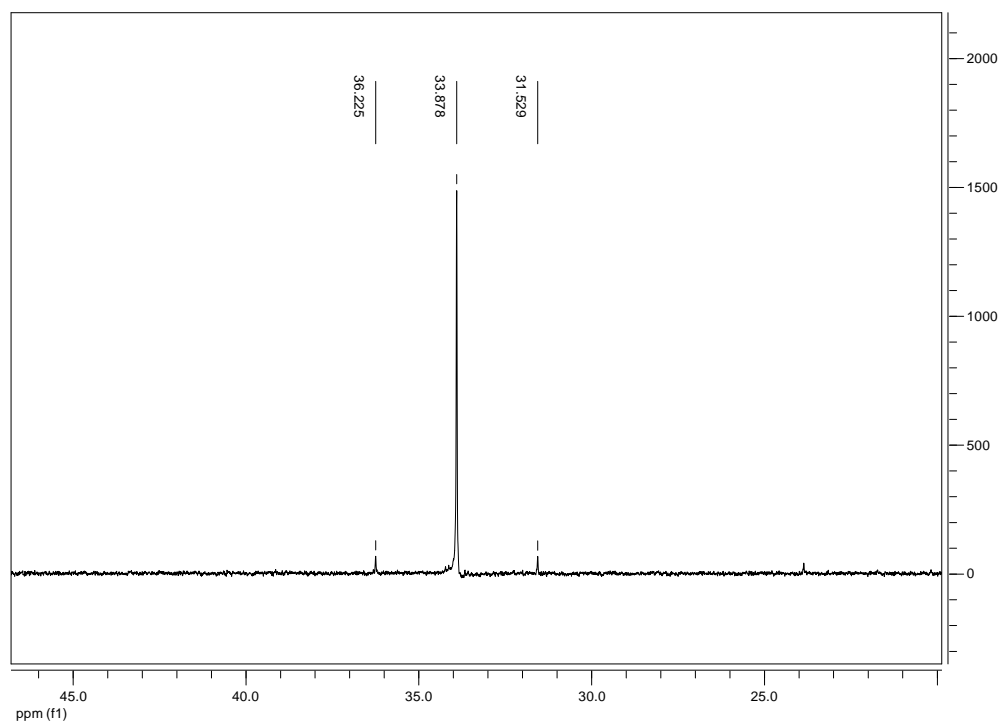



## Crystal Structure Analysis

Compound **2d (B)**:

### Crystal data

|                                                   |                                                                             |
|---------------------------------------------------|-----------------------------------------------------------------------------|
| <u>C<sub>23</sub>H<sub>17</sub>N<sub>4</sub>P</u> | $D_x = 1.335 \text{ Mg m}^{-3}$                                             |
| $M_r = 380.38$                                    |                                                                             |
| <u>Orthorhombic, <i>Pbca</i></u>                  | <u>Mo K<math>\alpha</math></u> radiation<br>$\lambda = 0.71073 \text{ \AA}$ |
| Hall symbol: <u>-P 2ac 2ab</u>                    | Cell parameters from <u>8814</u> reflections                                |
| $a = 13.3540 (8) \text{ \AA}$                     | $\theta = 1.0\text{--}27.5^\circ$                                           |
| $b = 14.4253 (4) \text{ \AA}$                     | $\mu = 0.16 \text{ mm}^{-1}$                                                |
| $c = 19.6452 (10) \text{ \AA}$                    | $T = 173 (2) \text{ K}$                                                     |
| $V = 3784.4 (3) \text{ \AA}^3$                    | Cell measurement pressure: <u>? kPa</u>                                     |
| $Z = 8$                                           | <u>Block, colorless</u>                                                     |
| $F_{000} = 1584$                                  | <u>0.30</u> $\times$ <u>0.25</u> $\times$ <u>0.15</u> mm                    |

### Data collection

|                                                      |                                               |
|------------------------------------------------------|-----------------------------------------------|
| <u>KappaCCD diffractometer</u>                       | <u>4321</u> independent reflections           |
| Radiation source: <u>fine-focus sealed tube</u>      | <u>2533</u> reflections with $I > 2\sigma(I)$ |
| Monochromator: <u>graphite</u>                       | $R_{\text{int}} = 0.072$                      |
| Detector resolution: <u>? pixels mm<sup>-1</sup></u> | $\theta_{\text{max}} = 27.5^\circ$            |
| $T = 173(2) \text{ K}$                               | $\theta_{\text{min}} = 2.1^\circ$             |
| $P = ? \text{ kPa}$                                  | $h = -17 \text{ } 10$                         |
| <u>phi and <math>\omega</math> scans</u>             | $k = -18 \text{ } 12$                         |
| Absorption correction: <u>none</u>                   | $l = -18 \text{ } 25$                         |
| <u>16637</u> measured reflections                    |                                               |

### Refinement

|                                                                       |                                                                                                     |
|-----------------------------------------------------------------------|-----------------------------------------------------------------------------------------------------|
| Refinement on $F^2$                                                   | Secondary atom site location: <u>difference Fourier map</u>                                         |
| Least-squares matrix: <u>full</u>                                     | Hydrogen site location: <u>inferred from neighbouring sites</u>                                     |
| $R[F^2 > 2\sigma(F^2)] = \underline{0.056}$                           | <u>H-atom parameters constrained</u>                                                                |
| $wR(F^2) = \underline{0.178}$                                         | $w = 1/[\sigma^2(F_o^2) + (0.0964P)^2]$<br>where $P = (F_o^2 + 2F_c^2)/3$                           |
| $S = \underline{1.04}$                                                | $(\Delta/\sigma)_{\max} < \underline{0.001}$                                                        |
| <u>4321</u> reflections                                               | $\Delta\rho_{\max} = \underline{0.47} \text{ e } \text{\AA}^{-3}$                                   |
| <u>254</u> parameters                                                 | $\Delta\rho_{\min} = \underline{-0.53} \text{ e } \text{\AA}^{-3}$                                  |
| <u>?</u> constraints                                                  | Extinction correction: <u>SHELXL</u> ,<br>$F_c^* = kFc[1+0.001xFc^2\lambda^3/\sin(2\theta)]^{-1/4}$ |
| Primary atom site location: <u>structure-invariant direct methods</u> | Extinction coefficient: <u>0.0064 (10)</u>                                                          |

Refinement of  $F^2$  against ALL reflections. The weighted  $R$ -factor  $wR$  and goodness of fit  $S$  are based on  $F^2$ , conventional  $R$ -factors  $R$  are based on  $F$ , with  $F$  set to zero for negative  $F^2$ . The threshold expression of  $F^2 > 2\sigma(F^2)$  is used only for calculating  $R$ -factors(gt) *etc.* and is not relevant to the choice of reflections for refinement.  $R$ -factors based on  $F^2$  are statistically about twice as large as those based on  $F$ , and  $R$ -factors based on ALL data will be even larger.

Fractional atomic coordinates and isotropic or equivalent isotropic displacement parameters ( $\text{\AA}^2$ )

|    | $x$        | $y$          | $z$          | $U_{\text{iso}}^*/U_{\text{eq}}$ |
|----|------------|--------------|--------------|----------------------------------|
| C1 | 0.2917 (2) | 0.3962 (2)   | 0.63462 (15) | 0.0445 (7)                       |
| H1 | 0.2829     | 0.4109       | 0.6814       | 0.053*                           |
| C2 | 0.2707 (2) | 0.31117 (19) | 0.61084 (15) | 0.0459 (8)                       |
| H2 | 0.2462     | 0.2652       | 0.6412       | 0.055*                           |
| C3 | 0.2843 (2) | 0.28902 (18) | 0.54184 (15) | 0.0422 (7)                       |
| H3 | 0.2695     | 0.2282       | 0.5262       | 0.051*                           |
| C4 | 0.3184 (2) | 0.35348 (16) | 0.49725 (14) | 0.0350 (7)                       |

|     |              |              |              |            |
|-----|--------------|--------------|--------------|------------|
| H4  | 0.3280       | 0.3383       | 0.4507       | 0.042*     |
| C5  | 0.33937 (19) | 0.44364 (16) | 0.52139 (13) | 0.0300 (6) |
| C6  | 0.3724 (2)   | 0.52895 (16) | 0.49557 (13) | 0.0306 (6) |
| C7  | 0.3990 (2)   | 0.55390 (16) | 0.42598 (13) | 0.0288 (6) |
| C8  | 0.4414 (2)   | 0.63897 (16) | 0.40926 (14) | 0.0354 (7) |
| H8  | 0.4536       | 0.6842       | 0.4434       | 0.042*     |
| C9  | 0.4653 (2)   | 0.65633 (17) | 0.34235 (15) | 0.0402 (7) |
| H9  | 0.4940       | 0.7141       | 0.3298       | 0.048*     |
| C10 | 0.4473 (2)   | 0.58907 (16) | 0.29312 (15) | 0.0375 (7) |
| H10 | 0.4648       | 0.5995       | 0.2469       | 0.045*     |
| C11 | 0.4029 (2)   | 0.50588 (16) | 0.31341 (13) | 0.0312 (6) |
| C12 | 0.3848 (2)   | 0.31085 (16) | 0.30077 (13) | 0.0306 (6) |
| C13 | 0.3125 (2)   | 0.24143 (17) | 0.30123 (13) | 0.0380 (7) |
| H13 | 0.2513       | 0.2502       | 0.2773       | 0.046*     |
| C14 | 0.3294 (3)   | 0.15884 (18) | 0.33672 (14) | 0.0446 (8) |
| H14 | 0.2805       | 0.1110       | 0.3359       | 0.054*     |
| C15 | 0.4170 (3)   | 0.14667 (17) | 0.37289 (14) | 0.0419 (8) |
| H15 | 0.4282       | 0.0906       | 0.3970       | 0.050*     |
| C16 | 0.4882 (2)   | 0.21564 (17) | 0.37407 (14) | 0.0400 (7) |
| H16 | 0.5479       | 0.2075       | 0.3997       | 0.048*     |
| C17 | 0.4731 (2)   | 0.29699 (16) | 0.33797 (14) | 0.0347 (7) |
| H17 | 0.5232       | 0.3438       | 0.3384       | 0.042*     |
| C18 | 0.4487 (2)   | 0.41595 (15) | 0.18499 (13) | 0.0307 (6) |
| C19 | 0.4092 (2)   | 0.40861 (17) | 0.11937 (13) | 0.0356 (7) |
| H19 | 0.3387       | 0.4095       | 0.1131       | 0.043*     |
| C20 | 0.4709 (2)   | 0.40008 (19) | 0.06368 (15) | 0.0428 (7) |
| H20 | 0.4428       | 0.3948       | 0.0194       | 0.051*     |

|     |              |              |              |            |
|-----|--------------|--------------|--------------|------------|
| C21 | 0.5739 (2)   | 0.39922 (17) | 0.07201 (15) | 0.0408 (7) |
| H21 | 0.6164       | 0.3932       | 0.0335       | 0.049*     |
| C22 | 0.6144 (2)   | 0.40708 (16) | 0.13581 (15) | 0.0373 (7) |
| H22 | 0.6851       | 0.4067       | 0.1414       | 0.045*     |
| C23 | 0.5524 (2)   | 0.41566 (16) | 0.19283 (14) | 0.0345 (7) |
| H23 | 0.5810       | 0.4213       | 0.2369       | 0.041*     |
| N1  | 0.32636 (18) | 0.46137 (14) | 0.58918 (11) | 0.0346 (5) |
| N2  | 0.35066 (19) | 0.55064 (16) | 0.60527 (12) | 0.0412 (6) |
| N3  | 0.37766 (17) | 0.59021 (14) | 0.54793 (12) | 0.0367 (6) |
| N4  | 0.37844 (17) | 0.48871 (13) | 0.37881 (10) | 0.0293 (5) |
| P1  | 0.35641 (6)  | 0.41764 (4)  | 0.25394 (3)  | 0.0322 (2) |

Atomic displacement parameters ( $\text{\AA}^2$ )

|    | $U^{11}$       | $U^{22}$       | $U^{33}$       | $U^{12}$        | $U^{13}$        | $U^{23}$        |
|----|----------------|----------------|----------------|-----------------|-----------------|-----------------|
| C1 | 0.0382<br>(18) | 0.0616<br>(19) | 0.0336<br>(16) | 0.0025 (15)     | 0.0079 (15)     | 0.0098 (14)     |
| C2 | 0.044 (2)      | 0.0508<br>(18) | 0.0430<br>(18) | -0.0017<br>(15) | 0.0055 (16)     | 0.0161 (14)     |
| C3 | 0.0424<br>(19) | 0.0372<br>(14) | 0.0472<br>(18) | -0.0016<br>(13) | -0.0046<br>(16) | 0.0092 (13)     |
| C4 | 0.0356<br>(16) | 0.0348<br>(14) | 0.0346<br>(15) | 0.0000 (12)     | -0.0046<br>(13) | 0.0013 (11)     |
| C5 | 0.0254<br>(15) | 0.0362<br>(14) | 0.0283<br>(14) | 0.0048 (11)     | -0.0018<br>(12) | 0.0023 (11)     |
| C6 | 0.0284<br>(15) | 0.0313<br>(13) | 0.0321<br>(15) | 0.0032 (11)     | -0.0023<br>(12) | -0.0040<br>(11) |
| C7 | 0.0251<br>(14) | 0.0273<br>(13) | 0.0341<br>(15) | 0.0037 (11)     | -0.0038<br>(12) | -0.0001<br>(11) |
| C8 | 0.0364<br>(17) | 0.0287<br>(14) | 0.0410<br>(16) | 0.0013 (12)     | 0.0006 (14)     | -0.0010<br>(11) |

|     |                |                |                |                 |                 |                 |
|-----|----------------|----------------|----------------|-----------------|-----------------|-----------------|
| C9  | 0.0376<br>(18) | 0.0249<br>(13) | 0.058 (2)      | -0.0013<br>(12) | 0.0038 (16)     | 0.0068 (13)     |
| C10 | 0.0421<br>(18) | 0.0312<br>(14) | 0.0391<br>(16) | 0.0041 (12)     | 0.0085 (14)     | 0.0076 (11)     |
| C11 | 0.0315<br>(16) | 0.0270<br>(13) | 0.0351<br>(15) | 0.0066 (11)     | 0.0038 (13)     | 0.0031 (11)     |
| C12 | 0.0366<br>(16) | 0.0284<br>(13) | 0.0269<br>(14) | -0.0018<br>(11) | 0.0054 (13)     | -0.0036<br>(10) |
| C13 | 0.0401<br>(18) | 0.0430<br>(15) | 0.0310<br>(15) | -0.0077<br>(13) | 0.0023 (14)     | -0.0045<br>(12) |
| C14 | 0.058 (2)      | 0.0343<br>(15) | 0.0416<br>(17) | -0.0156<br>(14) | 0.0087 (17)     | 0.0002 (12)     |
| C15 | 0.064 (2)      | 0.0272<br>(13) | 0.0347<br>(16) | -0.0018<br>(14) | 0.0032 (16)     | 0.0004 (11)     |
| C16 | 0.0484<br>(19) | 0.0366<br>(15) | 0.0350<br>(16) | 0.0033 (13)     | -0.0024<br>(15) | -0.0028<br>(12) |
| C17 | 0.0400<br>(18) | 0.0285<br>(13) | 0.0356<br>(16) | -0.0042<br>(12) | -0.0016<br>(14) | 0.0015 (11)     |
| C18 | 0.0334<br>(16) | 0.0262<br>(12) | 0.0324<br>(15) | 0.0000 (11)     | 0.0012 (13)     | 0.0016 (10)     |
| C19 | 0.0328<br>(16) | 0.0441<br>(15) | 0.0299<br>(15) | 0.0004 (12)     | -0.0009<br>(13) | -0.0006<br>(11) |
| C20 | 0.046 (2)      | 0.0522<br>(17) | 0.0303<br>(15) | 0.0006 (14)     | -0.0001<br>(15) | -0.0036<br>(12) |
| C21 | 0.049 (2)      | 0.0363<br>(15) | 0.0369<br>(17) | 0.0032 (13)     | 0.0128 (16)     | -0.0032<br>(12) |
| C22 | 0.0320<br>(16) | 0.0314<br>(14) | 0.0485<br>(18) | 0.0013 (12)     | 0.0031 (14)     | 0.0023 (12)     |
| C23 | 0.0383<br>(17) | 0.0322<br>(13) | 0.0328<br>(15) | 0.0012 (12)     | -0.0021<br>(14) | 0.0038 (11)     |
| N1  | 0.0326<br>(14) | 0.0419<br>(12) | 0.0292<br>(13) | 0.0010 (10)     | 0.0021 (11)     | -0.0003<br>(10) |
| N2  | 0.0408<br>(15) | 0.0473<br>(14) | 0.0356<br>(14) | 0.0001 (12)     | 0.0047 (12)     | -0.0082<br>(11) |

|    |                |                |                |             |             |                 |
|----|----------------|----------------|----------------|-------------|-------------|-----------------|
| N3 | 0.0345<br>(14) | 0.0396<br>(12) | 0.0360<br>(14) | 0.0015 (10) | 0.0005 (11) | -0.0054<br>(10) |
| N4 | 0.0329<br>(14) | 0.0256<br>(10) | 0.0295<br>(12) | 0.0023 (9)  | 0.0012 (11) | 0.0009 (9)      |
| P1 | 0.0329 (4)     | 0.0351 (4)     | 0.0287 (4)     | 0.0011 (3)  | 0.0018 (3)  | 0.0015 (3)      |

Geometric parameters (Å)

|         |           |         |           |
|---------|-----------|---------|-----------|
| C1—C2   | 1.342 (4) | C12—P1  | 1.834 (3) |
| C1—N1   | 1.377 (3) | C13—C14 | 1.399 (4) |
| C1—H1   | 0.9500    | C13—H13 | 0.9500    |
| C2—C3   | 1.405 (4) | C14—C15 | 1.380 (4) |
| C2—H2   | 0.9500    | C14—H14 | 0.9500    |
| C3—C4   | 1.356 (4) | C15—C16 | 1.377 (4) |
| C3—H3   | 0.9500    | C15—H15 | 0.9500    |
| C4—C5   | 1.412 (3) | C16—C17 | 1.386 (4) |
| C4—H4   | 0.9500    | C16—H16 | 0.9500    |
| C5—N1   | 1.367 (3) | C17—H17 | 0.9500    |
| C5—C6   | 1.402 (3) | C18—C23 | 1.394 (4) |
| C6—N3   | 1.358 (3) | C18—C19 | 1.397 (4) |
| C6—C7   | 1.458 (4) | C18—P1  | 1.831 (3) |
| C7—N4   | 1.348 (3) | C19—C20 | 1.374 (4) |
| C7—C8   | 1.391 (3) | C19—H19 | 0.9500    |
| C8—C9   | 1.376 (4) | C20—C21 | 1.385 (4) |
| C8—H8   | 0.9500    | C20—H20 | 0.9500    |
| C9—C10  | 1.391 (4) | C21—C22 | 1.370 (4) |
| C9—H9   | 0.9500    | C21—H21 | 0.9500    |
| C10—C11 | 1.396 (3) | C22—C23 | 1.398 (4) |
| C10—H10 | 0.9500    | C22—H22 | 0.9500    |

|          |           |             |           |
|----------|-----------|-------------|-----------|
| C11—N4   | 1.349 (3) | C23—H23     | 0.9500    |
| C11—P1   | 1.836 (3) | N1—N2       | 1.365 (3) |
| C12—C13  | 1.392 (4) | N2—N3       | 1.313 (3) |
| C12—C17  | 1.401 (4) |             |           |
| C2—C1—N1 | 117.9 (3) | C15—C14—C13 | 120.2 (3) |
| C2—C1—H1 | 121.0     | C15—C14—H14 | 119.9     |
| N1—C1—H1 | 121.0     | C13—C14—H14 | 119.9     |
| C1—C2—C3 | 121.1 (3) | C16—C15—C14 | 120.2 (3) |
| C1—C2—H2 | 119.4     | C16—C15—H15 | 119.9     |
| C3—C2—H2 | 119.4     | C14—C15—H15 | 119.9     |
| C4—C3—C2 | 120.7 (3) | C15—C16—C17 | 120.2 (3) |
| C4—C3—H3 | 119.6     | C15—C16—H16 | 119.9     |
| C2—C3—H3 | 119.6     | C17—C16—H16 | 119.9     |
| C3—C4—C5 | 118.8 (3) | C16—C17—C12 | 120.6 (2) |
| C3—C4—H4 | 120.6     | C16—C17—H17 | 119.7     |
| C5—C4—H4 | 120.6     | C12—C17—H17 | 119.7     |
| N1—C5—C6 | 103.2 (2) | C23—C18—C19 | 118.5 (3) |
| N1—C5—C4 | 118.3 (2) | C23—C18—P1  | 125.9 (2) |
| C6—C5—C4 | 138.5 (2) | C19—C18—P1  | 115.5 (2) |
| N3—C6—C5 | 108.3 (2) | C20—C19—C18 | 121.1 (3) |
| N3—C6—C7 | 122.5 (2) | C20—C19—H19 | 119.5     |
| C5—C6—C7 | 129.2 (2) | C18—C19—H19 | 119.5     |
| N4—C7—C8 | 122.4 (2) | C19—C20—C21 | 120.1 (3) |
| N4—C7—C6 | 115.0 (2) | C19—C20—H20 | 120.0     |
| C8—C7—C6 | 122.6 (2) | C21—C20—H20 | 120.0     |
| C9—C8—C7 | 118.7 (2) | C22—C21—C20 | 120.0 (3) |
| C9—C8—H8 | 120.6     | C22—C21—H21 | 120.0     |

|             |             |                 |             |
|-------------|-------------|-----------------|-------------|
| C7—C8—H8    | 120.6       | C20—C21—H21     | 120.0       |
| C8—C9—C10   | 119.8 (2)   | C21—C22—C23     | 120.4 (3)   |
| C8—C9—H9    | 120.1       | C21—C22—H22     | 119.8       |
| C10—C9—H9   | 120.1       | C23—C22—H22     | 119.8       |
| C9—C10—C11  | 118.3 (3)   | C18—C23—C22     | 120.0 (3)   |
| C9—C10—H10  | 120.8       | C18—C23—H23     | 120.0       |
| C11—C10—H10 | 120.8       | C22—C23—H23     | 120.0       |
| N4—C11—C10  | 122.2 (2)   | N2—N1—C5        | 111.8 (2)   |
| N4—C11—P1   | 113.37 (18) | N2—N1—C1        | 125.0 (2)   |
| C10—C11—P1  | 123.9 (2)   | C5—N1—C1        | 123.1 (2)   |
| C13—C12—C17 | 118.6 (2)   | N3—N2—N1        | 106.1 (2)   |
| C13—C12—P1  | 117.6 (2)   | N2—N3—C6        | 110.6 (2)   |
| C17—C12—P1  | 123.75 (19) | C7—N4—C11       | 118.5 (2)   |
| C12—C13—C14 | 120.2 (3)   | C18—P1—C12      | 102.74 (11) |
| C12—C13—H13 | 119.9       | C18—P1—C11      | 104.60 (12) |
| C14—C13—H13 | 119.9       | C12—P1—C11      | 101.13 (11) |
| N1—C1—C2—C3 | 0.4 (5)     | C20—C21—C22—C23 | 0.2 (4)     |
| C1—C2—C3—C4 | -0.5 (5)    | C19—C18—C23—C22 | -0.7 (3)    |
| C2—C3—C4—C5 | -0.4 (4)    | P1—C18—C23—C22  | 175.05 (18) |
| C3—C4—C5—N1 | 1.4 (4)     | C21—C22—C23—C18 | 0.2 (4)     |
| C3—C4—C5—C6 | -178.6 (3)  | C6—C5—N1—N2     | -0.8 (3)    |
| N1—C5—C6—N3 | 0.5 (3)     | C4—C5—N1—N2     | 179.2 (2)   |
| C4—C5—C6—N3 | -179.6 (3)  | C6—C5—N1—C1     | 178.4 (2)   |
| N1—C5—C6—C7 | 179.9 (3)   | C4—C5—N1—C1     | -1.5 (4)    |
| C4—C5—C6—C7 | -0.1 (5)    | C2—C1—N1—N2     | 179.8 (3)   |
| N3—C6—C7—N4 | -172.5 (2)  | C2—C1—N1—C5     | 0.6 (4)     |
| C5—C6—C7—N4 | 8.1 (4)     | C5—N1—N2—N3     | 0.9 (3)     |



|                 |            |                |              |
|-----------------|------------|----------------|--------------|
| N3—C6—C7—C8     | 6.8 (4)    | C1—N1—N2—N3    | -178.4 (3)   |
| C5—C6—C7—C8     | -172.6 (3) | N1—N2—N3—C6    | -0.6 (3)     |
| N4—C7—C8—C9     | -1.5 (4)   | C5—C6—N3—N2    | 0.1 (3)      |
| C6—C7—C8—C9     | 179.2 (3)  | C7—C6—N3—N2    | -179.4 (2)   |
| C7—C8—C9—C10    | -0.3 (4)   | C8—C7—N4—C11   | 2.1 (4)      |
| C8—C9—C10—C11   | 1.4 (4)    | C6—C7—N4—C11   | -178.6 (2)   |
| C9—C10—C11—N4   | -0.8 (4)   | C10—C11—N4—C7  | -0.9 (4)     |
| C9—C10—C11—P1   | 170.2 (2)  | P1—C11—N4—C7   | -172.77 (18) |
| C17—C12—C13—C14 | -1.7 (4)   | C23—C18—P1—C12 | -60.1 (2)    |
| P1—C12—C13—C14  | -179.3 (2) | C19—C18—P1—C12 | 115.75 (19)  |
| C12—C13—C14—C15 | 1.6 (4)    | C23—C18—P1—C11 | 45.1 (2)     |
| C13—C14—C15—C16 | -0.2 (4)   | C19—C18—P1—C11 | -138.98 (18) |
| C14—C15—C16—C17 | -1.2 (4)   | C13—C12—P1—C18 | -114.6 (2)   |
| C15—C16—C17—C12 | 1.0 (4)    | C17—C12—P1—C18 | 67.9 (2)     |
| C13—C12—C17—C16 | 0.4 (4)    | C13—C12—P1—C11 | 137.4 (2)    |
| P1—C12—C17—C16  | 177.8 (2)  | C17—C12—P1—C11 | -40.0 (3)    |
| C23—C18—C19—C20 | 0.8 (4)    | N4—C11—P1—C18  | -149.50 (19) |
| P1—C18—C19—C20  | -175.4 (2) | C10—C11—P1—C18 | 38.8 (3)     |
| C18—C19—C20—C21 | -0.4 (4)   | N4—C11—P1—C12  | -43.0 (2)    |
| C19—C20—C21—C22 | -0.1 (4)   | C10—C11—P1—C12 | 145.3 (2)    |

All e.s.d.'s (except the e.s.d. in the dihedral angle between two l.s. planes) are estimated using the full covariance matrix. The cell e.s.d.'s are taken into account individually in the estimation of e.s.d.'s in distances, angles and torsion angles; correlations between e.s.d.'s in cell parameters are only used when they are defined by crystal symmetry. An approximate (isotropic) treatment of cell e.s.d.'s is used for estimating e.s.d.'s involving l.s. planes.

Data collection: *Collect* (Nonius B.V., 1998); cell refinement: *DENZO* (Nonius B.V., 1998); data reduction: *DENZO* (Nonius B.V., 1998); program(s) used to solve structure: *SHELXS97* (Sheldrick, 1997); program(s) used to refine structure: *SHELXL97* (Sheldrick, 1997); molecular graphics: *PLATON 98* (Spek, 1998); software used to prepare material for publication: *SHELXL97* (Sheldrick, 1997).

Compound **3e (B)**:

*Crystal data*

|                                                     |                                                                                         |
|-----------------------------------------------------|-----------------------------------------------------------------------------------------|
| <u>C<sub>25</sub>H<sub>21</sub>N<sub>4</sub>PSe</u> | $F_{000} = \underline{496}$                                                             |
| $M_r = \underline{487.39}$                          | $D_x = \underline{1.456} \text{ Mg m}^{-3}$                                             |
| <u>Triclinic, <i>P</i></u>                          |                                                                                         |
| Hall symbol: <u>-P 1</u>                            | <u>Mo K<math>\alpha</math></u> radiation<br>$\lambda = \underline{0.71073} \text{ \AA}$ |
| $a = \underline{8.6696} \text{ (8)} \text{ \AA}$    | Cell parameters from <u>13838</u> reflections                                           |
| $b = \underline{11.0202} \text{ (11)} \text{ \AA}$  | $\theta = \underline{1.0-27.5}^\circ$                                                   |
| $c = \underline{12.2054} \text{ (15)} \text{ \AA}$  | $\mu = \underline{1.78} \text{ mm}^{-1}$                                                |
| $\alpha = \underline{88.075} \text{ (6)}^\circ$     | $T = \underline{173} \text{ (2)} \text{ K}$                                             |
| $\beta = \underline{87.392} \text{ (6)}^\circ$      | Cell measurement pressure: <u>? kPa</u>                                                 |
| $\gamma = \underline{72.639} \text{ (6)}^\circ$     | <u>Prism, colorless</u>                                                                 |
| $V = \underline{1111.6} \text{ (2)} \text{ \AA}^3$  | <u>0.16</u> $\times$ <u>0.12</u> $\times$ <u>0.10</u> mm                                |
| $Z = \underline{2}$                                 |                                                                                         |

*Data collection*

|                                                                                    |                                                |
|------------------------------------------------------------------------------------|------------------------------------------------|
| <u>KappaCCD diffractometer</u>                                                     | <u>10682</u> measured reflections              |
| Radiation source: <u>fine-focus sealed tube</u>                                    | <u>5065</u> independent reflections            |
| Monochromator: <u>graphite</u>                                                     | <u>2903</u> reflections with $I > 2\sigma(I)$  |
| Detector resolution: <u>? pixels mm<sup>-1</sup></u>                               | $R_{\text{int}} = \underline{0.079}$           |
| $T = \underline{173} \text{ (2)} \text{ K}$                                        | $\theta_{\text{max}} = \underline{27.6}^\circ$ |
| $P = \underline{?} \text{ kPa}$                                                    | $\theta_{\text{min}} = \underline{1.7}^\circ$  |
| <u>phi and <math>\omega</math> scans</u>                                           | $h = \underline{-11} \quad \underline{9}$      |
| Absorption correction: <u>multi-scan<br/>MULscanABS in PLATON (Spek,<br/>2003)</u> | $k = \underline{-14} \quad \underline{14}$     |
| $T_{\text{min}} = \underline{0.724}$ , $T_{\text{max}} = \underline{0.846}$        | $l = \underline{-13} \quad \underline{15}$     |

### Refinement

|                                                                       |                                                                                    |
|-----------------------------------------------------------------------|------------------------------------------------------------------------------------|
| Refinement on $F^2$                                                   | Secondary atom site location: <u>difference Fourier map</u>                        |
| Least-squares matrix: <u>full</u>                                     | Hydrogen site location: <u>inferred from neighbouring sites</u>                    |
| $R[F^2 > 2\sigma(F^2)] = \underline{0.092}$                           | <u>H-atom parameters constrained</u>                                               |
| $wR(F^2) = \underline{0.263}$                                         | $w = 1/[\sigma^2(F_o^2) + (0.113P)^2 + 2.7079P]$<br>where $P = (F_o^2 + 2F_c^2)/3$ |
| $S = \underline{1.10}$                                                | $(\Delta/\sigma)_{\max} < \underline{0.001}$                                       |
| <u>5065</u> reflections                                               | $\Delta\rho_{\max} = \underline{0.63} \text{ e } \text{\AA}^{-3}$                  |
| <u>282</u> parameters                                                 | $\Delta\rho_{\min} = \underline{-0.88} \text{ e } \text{\AA}^{-3}$                 |
| <u>?</u> constraints                                                  | Extinction correction: <u>none</u>                                                 |
| Primary atom site location: <u>structure-invariant direct methods</u> |                                                                                    |

Refinement of  $F^2$  against ALL reflections. The weighted  $R$ -factor  $wR$  and goodness of fit  $S$  are based on  $F^2$ , conventional  $R$ -factors  $R$  are based on  $F$ , with  $F$  set to zero for negative  $F^2$ . The threshold expression of  $F^2 > 2\sigma(F^2)$  is used only for calculating  $R$ -factors(gt) *etc.* and is not relevant to the choice of reflections for refinement.  $R$ -factors based on  $F^2$  are statistically about twice as large as those based on  $F$ , and  $R$ -factors based on ALL data will be even larger.

### Fractional atomic coordinates and isotropic or equivalent isotropic displacement parameters ( $\text{\AA}^2$ )

|    | $x$         | $y$         | $z$         | $U_{\text{iso}}^*/U_{\text{eq}}$ |
|----|-------------|-------------|-------------|----------------------------------|
| C1 | 0.6687 (10) | -0.2313 (7) | -0.0289 (8) | 0.041 (2)                        |
| H1 | 0.6735      | -0.2967     | -0.0788     | 0.049*                           |
| C2 | 0.6005 (10) | -0.2332 (7) | 0.0724 (8)  | 0.043 (2)                        |
| H2 | 0.5573      | -0.3003     | 0.0945      | 0.052*                           |
| C3 | 0.5939 (10) | -0.1366 (7) | 0.1442 (7)  | 0.0383 (19)                      |
| H3 | 0.5455      | -0.1388     | 0.2154      | 0.046*                           |
| C4 | 0.6540 (9)  | -0.0399 (7) | 0.1162 (6)  | 0.0303 (17)                      |

|      |             |             |             |             |
|------|-------------|-------------|-------------|-------------|
| H4   | 0.6494      | 0.0247      | 0.1669      | 0.036*      |
| C5   | 0.7245 (8)  | -0.0369 (6) | 0.0090 (6)  | 0.0278 (17) |
| C6   | 0.7978 (8)  | 0.0405 (6)  | -0.0533 (6) | 0.0253 (16) |
| C7   | 0.8244 (8)  | 0.1601 (7)  | -0.0289 (6) | 0.0279 (17) |
| C8   | 0.9074 (9)  | 0.2210 (7)  | -0.1025 (6) | 0.0308 (17) |
| H8   | 0.9495      | 0.1847      | -0.1711     | 0.037*      |
| C9   | 0.9263 (9)  | 0.3351 (7)  | -0.0724 (6) | 0.0320 (17) |
| H9   | 0.9797      | 0.3796      | -0.1214     | 0.038*      |
| C10  | 0.8677 (9)  | 0.3845 (7)  | 0.0288 (6)  | 0.0311 (17) |
| H10  | 0.8835      | 0.4613      | 0.0518      | 0.037*      |
| C11  | 0.7848 (8)  | 0.3186 (6)  | 0.0963 (6)  | 0.0249 (16) |
| C12  | 0.8150 (8)  | 0.4679 (6)  | 0.2812 (6)  | 0.0247 (15) |
| C13  | 0.9782 (9)  | 0.4065 (7)  | 0.2901 (6)  | 0.0300 (17) |
| H13  | 1.0227      | 0.3221      | 0.2649      | 0.036*      |
| C14  | 1.0746 (10) | 0.4666 (7)  | 0.3347 (6)  | 0.0338 (18) |
| H14  | 1.1862      | 0.4224      | 0.3414      | 0.041*      |
| C15  | 1.0160 (10) | 0.5918 (7)  | 0.3716 (6)  | 0.0329 (18) |
| C18  | 1.1258 (11) | 0.6564 (8)  | 0.4200 (7)  | 0.046 (2)   |
| H18A | 1.0610      | 0.7310      | 0.4604      | 0.069*      |
| H18B | 1.1898      | 0.6834      | 0.3611      | 0.069*      |
| H18C | 1.1985      | 0.5972      | 0.4702      | 0.069*      |
| C16  | 0.8540 (10) | 0.6507 (7)  | 0.3611 (7)  | 0.038 (2)   |
| H16  | 0.8097      | 0.7354      | 0.3857      | 0.046*      |
| C17  | 0.7535 (10) | 0.5920 (7)  | 0.3166 (6)  | 0.0331 (18) |
| H17  | 0.6419      | 0.6362      | 0.3100      | 0.040*      |
| C19  | 0.6952 (8)  | 0.2530 (6)  | 0.3213 (6)  | 0.0250 (15) |
| C20  | 0.8219 (9)  | 0.1411 (7)  | 0.3190 (6)  | 0.0292 (17) |

|      |              |              |              |             |
|------|--------------|--------------|--------------|-------------|
| H20  | 0.9026       | 0.1278       | 0.2617       | 0.035*      |
| C21  | 0.8311 (9)   | 0.0487 (7)   | 0.3998 (6)   | 0.0298 (17) |
| H21  | 0.9183       | -0.0278      | 0.3967       | 0.036*      |
| C22  | 0.7153 (9)   | 0.0649 (7)   | 0.4863 (6)   | 0.0322 (18) |
| C25  | 0.7301 (11)  | -0.0331 (8)  | 0.5759 (7)   | 0.049 (2)   |
| H25A | 0.7921       | -0.1167      | 0.5482       | 0.073*      |
| H25B | 0.6221       | -0.0353      | 0.6013       | 0.073*      |
| H25C | 0.7859       | -0.0117      | 0.6371       | 0.073*      |
| C23  | 0.5894 (9)   | 0.1778 (8)   | 0.4867 (7)   | 0.038 (2)   |
| H23  | 0.5091       | 0.1908       | 0.5443       | 0.046*      |
| C24  | 0.5757 (9)   | 0.2723 (7)   | 0.4067 (6)   | 0.0317 (18) |
| H24  | 0.4878       | 0.3483       | 0.4092       | 0.038*      |
| N1   | 0.7305 (7)   | -0.1347 (5)  | -0.0588 (5)  | 0.0318 (15) |
| N2   | 0.8016 (8)   | -0.1189 (6)  | -0.1577 (5)  | 0.0406 (17) |
| N3   | 0.8405 (8)   | -0.0134 (6)  | -0.1534 (5)  | 0.0365 (16) |
| N4   | 0.7625 (7)   | 0.2083 (5)   | 0.0696 (5)   | 0.0248 (13) |
| P1   | 0.6831 (2)   | 0.38533 (17) | 0.22541 (15) | 0.0248 (4)  |
| Se1  | 0.44749 (10) | 0.50076 (8)  | 0.19694 (8)  | 0.0445 (3)  |

Atomic displacement parameters ( $\text{\AA}^2$ )

|    | $U^{11}$  | $U^{22}$  | $U^{33}$  | $U^{12}$   | $U^{13}$   | $U^{23}$   |
|----|-----------|-----------|-----------|------------|------------|------------|
| C1 | 0.040 (5) | 0.024 (4) | 0.060 (6) | -0.006 (4) | -0.027 (4) | -0.008 (4) |
| C2 | 0.044 (5) | 0.029 (4) | 0.058 (6) | -0.012 (4) | -0.008 (4) | 0.007 (4)  |
| C3 | 0.041 (5) | 0.037 (4) | 0.039 (5) | -0.014 (4) | -0.007 (4) | 0.005 (4)  |
| C4 | 0.031 (4) | 0.027 (4) | 0.030 (4) | -0.005 (3) | -0.006 (3) | -0.002 (3) |
| C5 | 0.022 (4) | 0.023 (4) | 0.033 (4) | 0.002 (3)  | -0.011 (3) | -0.005 (3) |
| C6 | 0.021 (4) | 0.025 (4) | 0.027 (4) | -0.003 (3) | -0.003 (3) | -0.003 (3) |

|     |            |            |             |             |             |             |
|-----|------------|------------|-------------|-------------|-------------|-------------|
| C7  | 0.024 (4)  | 0.027 (4)  | 0.030 (4)   | -0.003 (3)  | -0.004 (3)  | -0.005 (3)  |
| C8  | 0.024 (4)  | 0.041 (4)  | 0.026 (4)   | -0.007 (3)  | -0.003 (3)  | 0.000 (3)   |
| C9  | 0.032 (4)  | 0.038 (4)  | 0.033 (5)   | -0.023 (3)  | -0.003 (3)  | 0.009 (3)   |
| C10 | 0.034 (4)  | 0.030 (4)  | 0.034 (5)   | -0.016 (3)  | -0.006 (3)  | 0.002 (3)   |
| C11 | 0.021 (4)  | 0.025 (4)  | 0.027 (4)   | -0.004 (3)  | -0.004 (3)  | -0.001 (3)  |
| C12 | 0.028 (4)  | 0.025 (4)  | 0.025 (4)   | -0.013 (3)  | -0.003 (3)  | -0.001 (3)  |
| C13 | 0.035 (4)  | 0.023 (4)  | 0.033 (4)   | -0.010 (3)  | -0.001 (3)  | -0.001 (3)  |
| C14 | 0.034 (4)  | 0.033 (4)  | 0.037 (5)   | -0.014 (3)  | -0.005 (3)  | -0.001 (3)  |
| C15 | 0.042 (5)  | 0.036 (4)  | 0.028 (4)   | -0.022 (4)  | -0.007 (3)  | -0.002 (3)  |
| C18 | 0.054 (5)  | 0.050 (5)  | 0.045 (5)   | -0.031 (4)  | -0.011 (4)  | -0.010 (4)  |
| C16 | 0.043 (5)  | 0.031 (4)  | 0.040 (5)   | -0.008 (4)  | -0.004 (4)  | -0.017 (4)  |
| C17 | 0.037 (4)  | 0.026 (4)  | 0.037 (5)   | -0.009 (3)  | 0.001 (3)   | -0.009 (3)  |
| C19 | 0.026 (4)  | 0.029 (4)  | 0.025 (4)   | -0.016 (3)  | -0.003 (3)  | -0.006 (3)  |
| C20 | 0.026 (4)  | 0.034 (4)  | 0.030 (4)   | -0.011 (3)  | 0.002 (3)   | -0.009 (3)  |
| C21 | 0.035 (4)  | 0.023 (4)  | 0.033 (4)   | -0.012 (3)  | -0.005 (3)  | -0.001 (3)  |
| C22 | 0.041 (5)  | 0.042 (4)  | 0.025 (4)   | -0.028 (4)  | -0.012 (3)  | 0.001 (3)   |
| C25 | 0.057 (6)  | 0.052 (5)  | 0.046 (5)   | -0.030 (5)  | -0.009 (4)  | 0.008 (4)   |
| C23 | 0.032 (4)  | 0.057 (5)  | 0.032 (5)   | -0.024 (4)  | 0.005 (3)   | -0.010 (4)  |
| C24 | 0.028 (4)  | 0.034 (4)  | 0.032 (4)   | -0.008 (3)  | 0.000 (3)   | -0.002 (3)  |
| N1  | 0.032 (4)  | 0.025 (3)  | 0.037 (4)   | -0.006 (3)  | -0.010 (3)  | -0.008 (3)  |
| N2  | 0.049 (4)  | 0.036 (4)  | 0.034 (4)   | -0.006 (3)  | -0.008 (3)  | -0.013 (3)  |
| N3  | 0.042 (4)  | 0.033 (4)  | 0.032 (4)   | -0.006 (3)  | 0.002 (3)   | -0.014 (3)  |
| N4  | 0.024 (3)  | 0.024 (3)  | 0.028 (3)   | -0.010 (3)  | -0.002 (2)  | -0.002 (2)  |
| P1  | 0.0230 (9) | 0.0232 (9) | 0.0300 (11) | -0.0087 (8) | -0.0029 (8) | -0.0045 (7) |
| Se1 | 0.0340 (5) | 0.0406 (5) | 0.0593 (7)  | -0.0112 (4) | -0.0020 (4) | -0.0036 (4) |

Geometric parameters (Å)

|         |            |          |            |
|---------|------------|----------|------------|
| C1—C2   | 1.348 (12) | C14—C15  | 1.402 (10) |
| C1—N1   | 1.361 (10) | C14—H14  | 0.9500     |
| C1—H1   | 0.9500     | C15—C16  | 1.371 (11) |
| C2—C3   | 1.387 (12) | C15—C18  | 1.499 (11) |
| C2—H2   | 0.9500     | C18—H18A | 0.9800     |
| C3—C4   | 1.347 (11) | C18—H18B | 0.9800     |
| C3—H3   | 0.9500     | C18—H18C | 0.9800     |
| C4—C5   | 1.422 (11) | C16—C17  | 1.369 (11) |
| C4—H4   | 0.9500     | C16—H16  | 0.9500     |
| C5—N1   | 1.368 (9)  | C17—H17  | 0.9500     |
| C5—C6   | 1.394 (10) | C19—C20  | 1.385 (10) |
| C6—N3   | 1.363 (9)  | C19—C24  | 1.410 (10) |
| C6—C7   | 1.447 (10) | C19—P1   | 1.821 (7)  |
| C7—N4   | 1.353 (9)  | C20—C21  | 1.381 (10) |
| C7—C8   | 1.401 (11) | C20—H20  | 0.9500     |
| C8—C9   | 1.379 (11) | C21—C22  | 1.401 (11) |
| C8—H8   | 0.9500     | C21—H21  | 0.9500     |
| C9—C10  | 1.380 (10) | C22—C23  | 1.389 (11) |
| C9—H9   | 0.9500     | C22—C25  | 1.493 (11) |
| C10—C11 | 1.393 (10) | C25—H25A | 0.9800     |
| C10—H10 | 0.9500     | C25—H25B | 0.9800     |
| C11—N4  | 1.340 (9)  | C25—H25C | 0.9800     |
| C11—P1  | 1.834 (7)  | C23—C24  | 1.386 (11) |
| C12—C13 | 1.382 (10) | C23—H23  | 0.9500     |
| C12—C17 | 1.388 (10) | C24—H24  | 0.9500     |
| C12—P1  | 1.826 (7)  | N1—N2    | 1.359 (9)  |
| C13—C14 | 1.353 (11) | N2—N3    | 1.307 (9)  |

|           |           |               |             |
|-----------|-----------|---------------|-------------|
| C13—H13   | 0.9500    | P1—Se1        | 2.0965 (19) |
| C2—C1—N1  | 119.3 (7) | H18A—C18—H18B | 109.5       |
| C2—C1—H1  | 120.4     | C15—C18—H18C  | 109.5       |
| N1—C1—H1  | 120.4     | H18A—C18—H18C | 109.5       |
| C1—C2—C3  | 119.6 (8) | H18B—C18—H18C | 109.5       |
| C1—C2—H2  | 120.2     | C17—C16—C15   | 122.4 (7)   |
| C3—C2—H2  | 120.2     | C17—C16—H16   | 118.8       |
| C4—C3—C2  | 122.1 (8) | C15—C16—H16   | 118.8       |
| C4—C3—H3  | 119.0     | C16—C17—C12   | 119.9 (7)   |
| C2—C3—H3  | 119.0     | C16—C17—H17   | 120.1       |
| C3—C4—C5  | 118.5 (7) | C12—C17—H17   | 120.1       |
| C3—C4—H4  | 120.8     | C20—C19—C24   | 119.7 (7)   |
| C5—C4—H4  | 120.8     | C20—C19—P1    | 123.1 (6)   |
| N1—C5—C6  | 104.2 (6) | C24—C19—P1    | 117.0 (5)   |
| N1—C5—C4  | 117.6 (7) | C21—C20—C19   | 120.2 (7)   |
| C6—C5—C4  | 138.1 (7) | C21—C20—H20   | 119.9       |
| N3—C6—C5  | 107.5 (6) | C19—C20—H20   | 119.9       |
| N3—C6—C7  | 121.2 (7) | C20—C21—C22   | 121.7 (7)   |
| C5—C6—C7  | 131.2 (6) | C20—C21—H21   | 119.2       |
| N4—C7—C8  | 122.9 (7) | C22—C21—H21   | 119.2       |
| N4—C7—C6  | 114.9 (6) | C23—C22—C21   | 117.0 (7)   |
| C8—C7—C6  | 122.2 (7) | C23—C22—C25   | 121.6 (7)   |
| C9—C8—C7  | 118.1 (7) | C21—C22—C25   | 121.3 (7)   |
| C9—C8—H8  | 120.9     | C22—C25—H25A  | 109.5       |
| C7—C8—H8  | 120.9     | C22—C25—H25B  | 109.5       |
| C8—C9—C10 | 120.0 (7) | H25A—C25—H25B | 109.5       |
| C8—C9—H9  | 120.0     | C22—C25—H25C  | 109.5       |



|              |           |                 |            |
|--------------|-----------|-----------------|------------|
| C10—C9—H9    | 120.0     | H25A—C25—H25C   | 109.5      |
| C9—C10—C11   | 118.1 (7) | H25B—C25—H25C   | 109.5      |
| C9—C10—H10   | 120.9     | C24—C23—C22     | 122.9 (7)  |
| C11—C10—H10  | 120.9     | C24—C23—H23     | 118.6      |
| N4—C11—C10   | 123.6 (6) | C22—C23—H23     | 118.6      |
| N4—C11—P1    | 114.9 (5) | C23—C24—C19     | 118.5 (7)  |
| C10—C11—P1   | 121.3 (5) | C23—C24—H24     | 120.7      |
| C13—C12—C17  | 118.9 (7) | C19—C24—H24     | 120.7      |
| C13—C12—P1   | 120.1 (5) | N2—N1—C1        | 126.3 (7)  |
| C17—C12—P1   | 120.9 (6) | N2—N1—C5        | 110.8 (6)  |
| C14—C13—C12  | 119.9 (7) | C1—N1—C5        | 122.9 (7)  |
| C14—C13—H13  | 120.0     | N3—N2—N1        | 106.8 (6)  |
| C12—C13—H13  | 120.0     | N2—N3—C6        | 110.6 (6)  |
| C13—C14—C15  | 122.5 (7) | C11—N4—C7       | 117.2 (6)  |
| C13—C14—H14  | 118.8     | C19—P1—C12      | 104.2 (3)  |
| C15—C14—H14  | 118.8     | C19—P1—C11      | 107.4 (3)  |
| C16—C15—C14  | 116.4 (7) | C12—P1—C11      | 105.0 (3)  |
| C16—C15—C18  | 122.3 (7) | C19—P1—Se1      | 114.6 (2)  |
| C14—C15—C18  | 121.3 (7) | C12—P1—Se1      | 114.7 (2)  |
| C15—C18—H18A | 109.5     | C11—P1—Se1      | 110.3 (2)  |
| C15—C18—H18B | 109.5     |                 |            |
| N1—C1—C2—C3  | 0.2 (12)  | C22—C23—C24—C19 | -0.2 (12)  |
| C1—C2—C3—C4  | -0.1 (12) | C20—C19—C24—C23 | 0.3 (11)   |
| C2—C3—C4—C5  | 0.8 (11)  | P1—C19—C24—C23  | -174.4 (6) |
| C3—C4—C5—N1  | -1.5 (10) | C2—C1—N1—N2     | -179.5 (7) |
| C3—C4—C5—C6  | 179.8 (8) | C2—C1—N1—C5     | -1.1 (11)  |
| N1—C5—C6—N3  | 0.9 (7)   | C6—C5—N1—N2     | -0.6 (7)   |

|                 |            |                |            |
|-----------------|------------|----------------|------------|
| C4—C5—C6—N3     | 179.6 (8)  | C4—C5—N1—N2    | -179.6 (6) |
| N1—C5—C6—C7     | 178.0 (7)  | C6—C5—N1—C1    | -179.2 (6) |
| C4—C5—C6—C7     | -3.2 (14)  | C4—C5—N1—C1    | 1.7 (10)   |
| N3—C6—C7—N4     | 174.0 (6)  | C1—N1—N2—N3    | 178.6 (6)  |
| C5—C6—C7—N4     | -2.8 (11)  | C5—N1—N2—N3    | 0.0 (8)    |
| N3—C6—C7—C8     | -5.7 (10)  | N1—N2—N3—C6    | 0.5 (8)    |
| C5—C6—C7—C8     | 177.5 (7)  | C5—C6—N3—N2    | -0.9 (8)   |
| N4—C7—C8—C9     | 0.0 (10)   | C7—C6—N3—N2    | -178.4 (6) |
| C6—C7—C8—C9     | 179.7 (7)  | C10—C11—N4—C7  | -0.2 (10)  |
| C7—C8—C9—C10    | 1.6 (11)   | P1—C11—N4—C7   | 175.0 (5)  |
| C8—C9—C10—C11   | -2.4 (11)  | C8—C7—N4—C11   | -0.7 (10)  |
| C9—C10—C11—N4   | 1.8 (11)   | C6—C7—N4—C11   | 179.6 (6)  |
| C9—C10—C11—P1   | -173.1 (5) | C20—C19—P1—C12 | -80.7 (6)  |
| C17—C12—C13—C14 | 1.2 (11)   | C24—C19—P1—C12 | 93.8 (6)   |
| P1—C12—C13—C14  | -177.9 (6) | C20—C19—P1—C11 | 30.3 (7)   |
| C12—C13—C14—C15 | -1.1 (12)  | C24—C19—P1—C11 | -155.2 (6) |
| C13—C14—C15—C16 | 0.6 (12)   | C20—C19—P1—Se1 | 153.2 (5)  |
| C13—C14—C15—C18 | -179.5 (8) | C24—C19—P1—Se1 | -32.4 (6)  |
| C14—C15—C16—C17 | -0.4 (12)  | C13—C12—P1—C19 | 62.3 (6)   |
| C18—C15—C16—C17 | 179.8 (8)  | C17—C12—P1—C19 | -116.7 (6) |
| C15—C16—C17—C12 | 0.6 (13)   | C13—C12—P1—C11 | -50.4 (7)  |
| C13—C12—C17—C16 | -1.0 (11)  | C17—C12—P1—C11 | 130.5 (6)  |
| P1—C12—C17—C16  | 178.1 (6)  | C13—C12—P1—Se1 | -171.6 (5) |
| C24—C19—C20—C21 | 0.1 (11)   | C17—C12—P1—Se1 | 9.4 (7)    |
| P1—C19—C20—C21  | 174.4 (6)  | N4—C11—P1—C19  | 37.3 (6)   |
| C19—C20—C21—C22 | -0.5 (11)  | C10—C11—P1—C19 | -147.4 (6) |
| C20—C21—C22—C23 | 0.6 (11)   | N4—C11—P1—C12  | 147.7 (5)  |

|                 |            |                |           |
|-----------------|------------|----------------|-----------|
| C20—C21—C22—C25 | -177.3 (7) | C10—C11—P1—C12 | -36.9 (6) |
| C21—C22—C23—C24 | -0.2 (11)  | N4—C11—P1—Se1  | -88.3 (5) |
| C25—C22—C23—C24 | 177.7 (8)  | C10—C11—P1—Se1 | 87.1 (6)  |

All e.s.d.'s (except the e.s.d. in the dihedral angle between two l.s. planes) are estimated using the full covariance matrix. The cell e.s.d.'s are taken into account individually in the estimation of e.s.d.'s in distances, angles and torsion angles; correlations between e.s.d.'s in cell parameters are only used when they are defined by crystal symmetry. An approximate (isotropic) treatment of cell e.s.d.'s is used for estimating e.s.d.'s involving l.s. planes.

Data collection: Collect (Nonius B.V., 1998); cell refinement: DENZO (Nonius B.V., 1998); data reduction: DENZO (Nonius B.V., 1998); program(s) used to solve structure: SHELXS97 (Sheldrick, 1997); program(s) used to refine structure: SHELXL97 (Sheldrick, 1997); molecular graphics: PLATON 98 (Spek, 1998); software used to prepare material for publication: SHELXL97 (Sheldrick, 1997).
